# Supplementary material for: High-throughput optimization of the C–H arylation of oxetanes via Ni/aldehyde photocatalysis
Source: Royal Society of Chemistry journal article supplement (doi:10.1039/d4ob01271b), 2024-01-01
Supplement: d4ob01271b1.pdf [file d4ob01271b1.pdf]

# High-Throughput Optimization of the C–H Arylation of Oxetanes via Ni/Aldehyde Photocatalysis

Justin B. Diccianni\*, Bo Hao‡, Wei Liu‡, Iulia I. Strambeanu

Chemical Capabilities, Analytical and Purification, Global Discovery Chemistry, Therapeutics Discovery, Janssen Research & Development, LLC, Welsh & McKean Roads, Spring House, Pennsylvania 19477, United States

## Supporting Information

|                                                                                      |    |
|--------------------------------------------------------------------------------------|----|
| I. General Experimental Information .....                                            | 2  |
| General Information. ....                                                            | 2  |
| Instrumentation. ....                                                                | 2  |
| II. General Procedures .....                                                         | 3  |
| General Procedure A. General procedure for oxetane arylation via HTE .....           | 3  |
| General Procedure B. General procedure for preparative scale oxetane arylation ..... | 3  |
| General Procedure C. General procedure for parallel oxetane arylation .....          | 3  |
| III. Control reactions .....                                                         | 4  |
| IV. Additional substrates.....                                                       | 6  |
| V. Reaction Kinetics .....                                                           | 7  |
| VI. Compound Characterization .....                                                  | 8  |
| VII. Pictures of NMR Spectra .....                                                   | 20 |
| VIII. HTE Data .....                                                                 | 55 |
| IX. Mass Table for Parallel Oxetane Arylation.....                                   | 73 |

## I. General Experimental Information

**General Information.** All reagents and starting materials were purchased and used as received without further purification. Solvents were used from sealed anhydrous bottles. Catalysts were purchased from commercial sources and stored inside of an MBraun glovebox ( $O_2 < 0.1$  ppm and  $H_2O < 0.1$  ppm) High-throughput experiments were set up inside of the glovebox, in aluminum 24- or 96-position reactor blocks (Analytical Sales & Services, SKU 24253 and SKU 96973) filled with 1 mL borosilicate vials (Analytical Sales & Services, 8 x 30 mm, flat bottom, SKU 84001) containing 4.80 mm parylene coated magnetic stir bars (Analytical Sales & Services, SKU 13258) and sealed with a film of PFA supported by a rubber mat and an aluminum backed screw-down plate cap, while stirring and heating were achieved by tumble stirring (V&P Scientific Magnetic Tumble Stirrer, 500 rpm) and heating on a temperature-controlled heating block. Liquid dispensing was achieved using standard single channel and multi-channel pipettes without additional calibration. Slurry transfer was achieved in parallel using a multi-channel pipette and clipped pipette tips to permit transfer of heterogenous mixtures. Scale-up reactions were performed in standard lab glassware or disposable borosilicate vials with stirring. Purified compounds were obtained in >95% purity, as assessed by UPLC-MS and/or  $^1H$  NMR, unless otherwise indicated. Analytical thin layer chromatography (TLC) was performed using 250  $\mu m$  Silica Gel 60 F254 pre-coated plates. Chemical shifts ( $\delta$ ) are reported in parts per million (ppm) downfield relative to tetramethylsilane (TMS, 0.0 ppm),  $CDCl_3$  (7.26 ppm for  $^1H$  NMR, 77.23 ppm for  $^{13}C$  NMR) or  $(CD_3)_2SO$  (2.50 ppm for  $^1H$  NMR, 39.58 ppm for  $^{13}C$  NMR). Ratios of diastereomers were determined by  $^1H$  NMR analysis of the crude reaction mixtures before purification. In reactions with substituted oxetanes, the relative stereochemistry of the major diastereomers was determined by analysis of coupling constants. Coupling constants (J) are reported in Hz. Multiplicities are reported using the following abbreviations: s, singlet; d, doublet; t, triplet; q, quartet; p, pentet; m, multiplet; b, broad.

**Instrumentation.** Irradiation of all reactions was performed with Analytical Sales and Services Lumidox II equipment – 24- and 96-position LED arrays (lens mat with active cooling,  $\lambda=375$  nm, optical power = stage 1). Analytical samples were performed on a Waters Acquity I-Class Ultra-High Pressure Liquid Chromatography-Mass Spec with a PDA detector and SQD2 mass-detection (ESI-pos/neg). Charged-Aerosol Detection was performed using a Waters Acquity I-Class UPLC-MS equipped with PDA and SQD2 detectors (ESI positive ionization mode); column: Waters CSH C18, 2.1mm x 50 mm (Waters # 186006101) with Waters ACQUITY UPLC Col. In-Line Filter Kit (Waters #205000343); Mobile Phase A: 0.1 % trifluoroacetic acid in MilliQ water, Mobile Phase B: 0.1% trifluoroacetic acid in Optima grade Acetonitrile. Corona Aerosol Detection (CAD) analysis was conducted with Thermo Corona™ Veo™ RS Charged Aerosol Detector. The flow rate was 2 mL/min using a gradient from 5-100% Acetonitrile over 2 minutes. The total run time for each injection was 2.3 minutes. Flash column chromatography was performed using an Isco with RediSep silica columns. Proton nuclear magnetic resonance ( $^1H$  NMR) spectra were recorded using a Bruker AVANCE III HD NanoBay 400 NMR spectrometer. Carbon-13 nuclear magnetic resonance ( $^{13}C$  NMR) spectra were recorded using a Bruker AVANCE III HD NanoBay 400 NMR spectrometer at 101 MHz. Reverse phase purification was performed using a Waters mass-triggered liquid chromatography using Waters XSelect CSH (C18, 5u, 19x100 mm) or Waters XBridge BEH (C18, 5u, 19x100 mm) reversed-phase columns and appropriate linear gradients of increasing concentration of acetonitrile in water, 0.1% TFA or FA. Fractions

containing the desired product were combined and concentrated by centrifuge evaporation. High-throughput NMR data were collected using a Bruker AVANCE III HD solution-state NMR spectrometer equipped with a room temperature 1 mm TXI Microprobe at 400 MHz proton frequency at 298 K. The pulse sequence used was a one-dimensional (1D) proton experiment with water presaturation (zgpr). The acquisition time was 2.04 s using 32768 points for 20 ppm sweep width. High resolution mass spectra (HRMS) are reported as *m/z* (relative ratio). An Agilent 1260 Infinity Series was used for ESI-TOF analysis (Agilent model 6230). Accurate *m/z* are reported for the molecular ion [M+H]<sup>+</sup> unless stated otherwise.

## II. General Procedures

### General Procedure A. General procedure for oxetane arylation via HTE

In a nitrogen-filled glovebox, a 96-well plate of 1 mL vials was charged with base (20 μmol, 2 equiv) and Ni catalyst (1 μmol, 0.1 equiv) as solids. A solution of aldehyde (5 μmol, 0.5 equiv) or other HAT reagent was added to the wells in the chosen solvent. A solution of aryl halide (10 μmol, 1 equiv) and oxetane (6.5 μmol, 10 equiv) in the chosen solvent was added to the wells. The plate was sealed, removed from the glovebox, and irradiated with 375 nm light on a 96 well plate Lumidox® II at power level 1 (50 mW) for 20 h. A solution of Ph<sub>3</sub>N (0.5 mL, 0.01 M) internal standard in MeCN was added to each well and the plate was centrifuged to settle out the solids. Aliquots of 25 μL were taken from the supernatants and diluted with 0.75 mL MeCN. Analysis was performed by UPLC-MS and yields were determined by calibration against an authentic product standard.

### General Procedure B. General procedure for preparative scale oxetane arylation

A 1 dram vial was charged with aryl halide (0.2 mmol, 1 equiv) and brought into a nitrogen-filled glovebox. KF (23.2 mg, 0.4 mmol, 2 equiv) was added to the vial. A solution of (dtbbpy)NiBr<sub>2</sub> (11.2 mg, 0.02 mmol, 10 mol %) and *p*-cyanobenzaldehyde (13.2 mg, 0.1 mmol, 0.5 equiv) in 2 mL of 3:1 TFT:acetone was added to the vial. Oxetane (130 mL, 2 mmol, 10 equiv) was added then the vial was capped and removed from the glovebox. The reaction mixture was irradiated with 375 nm light on a 24 well plate Lumidox® II at power level 1 (60 mW) for 20 h while being cooled with two fans. The reaction mixture was filtered, and volatiles were removed from the filtrate under vacuum. The residue was purified by chromatography (silica, EtOAc/heptane).

### General Procedure C. General procedure for parallel oxetane arylation

In a nitrogen-filled glovebox, to 1-dram vials containing the appropriate aryl halide substrate (0.1 mmol) was added (dtbbpy)NiBr<sub>2</sub> 4H<sub>2</sub>O (5.59 mg, 0.01 mmol, 0.1 eq.), 4-cyanobenzaldehyde (6.6 mg, 0.05 mmol, 0.5 eq.), potassium fluoride (11.6 mg, 0.2 mmol, 2 eq.), trifluorotoluene (0.75 mL) and acetone (0.25 mL), followed by oxetane (65 μL, 1 mmol, 10 eq.). The 24-well plate was then sealed, stirred, and irradiated with LED arrays (24 well plate Lumidox® II at power level 1, 60 mW) overnight. Afterwards, the solvent was reduced to ~0.1 mL by Genevac. To each vial was added 0.2 mL of 1,3,5-trimethoxybenzene in d<sub>6</sub>-DMSO (0.1 M) as the internal standard. After stirring for 10 mins, a 0.1 mL aliquot was taken and filtered into a 96-well plate, followed by 0.2 mL d<sub>6</sub>-DMSO rinse. The plate was sealed and analyzed by HT-NMR of the crude reaction mixtures.

### III. Control reactions

Experiments were set up according to General Procedure A with the modifications indicated in the table. Yields were determined by UPLC calibrated against an authentic product sample.

**Table S1.** Control reactions

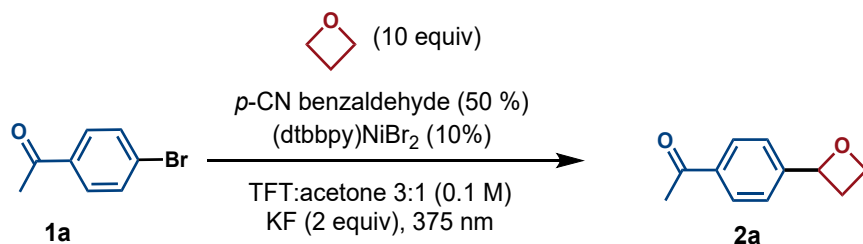

|    | Deviation from standard conditions | UPLC Yield (%) |
|----|------------------------------------|----------------|
| 1  | None                               | 95             |
| 2  | No ligand                          | 10             |
| 3  | No Ni                              | 0              |
| 4  | No aldehyde                        | 0              |
| 5  | No base                            | 50             |
| 6  | 1 equiv TEMPO added                | 13             |
| 7  | No light                           | 0              |
| 8  | 445 nm                             | 0              |
| 9  | 405 nm                             | 23             |
| 10 | 395 nm                             | 82             |
| 11 | 365 nm                             | 42             |

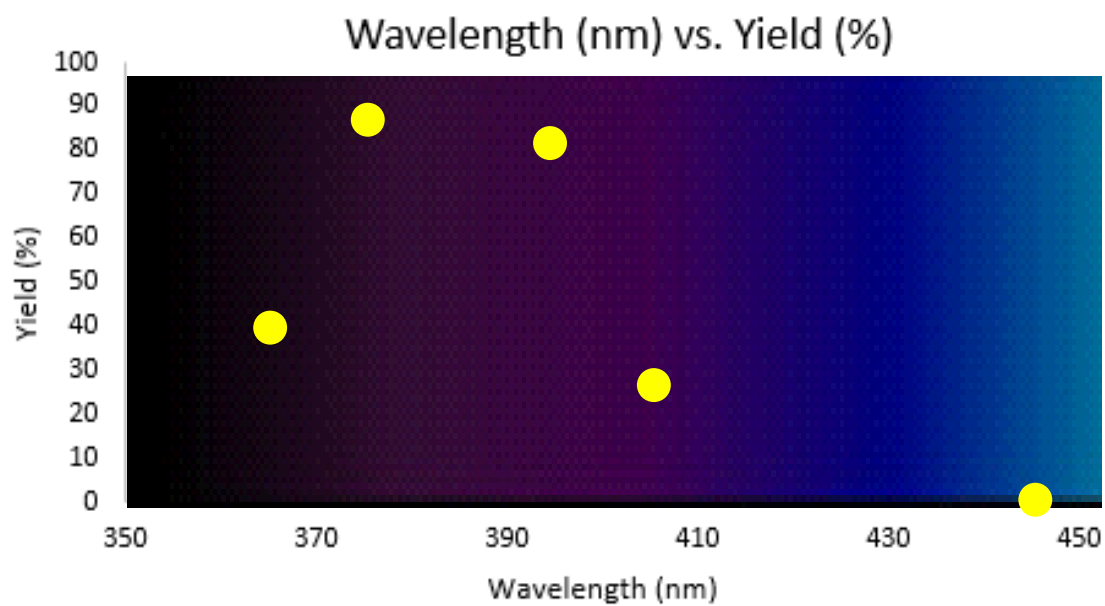

**Figure S1.** Yield of model reaction vs. wavelength of light employed.

## IV. Additional substrates

Compounds were synthesized according to General Procedure A using the substrates indicated.

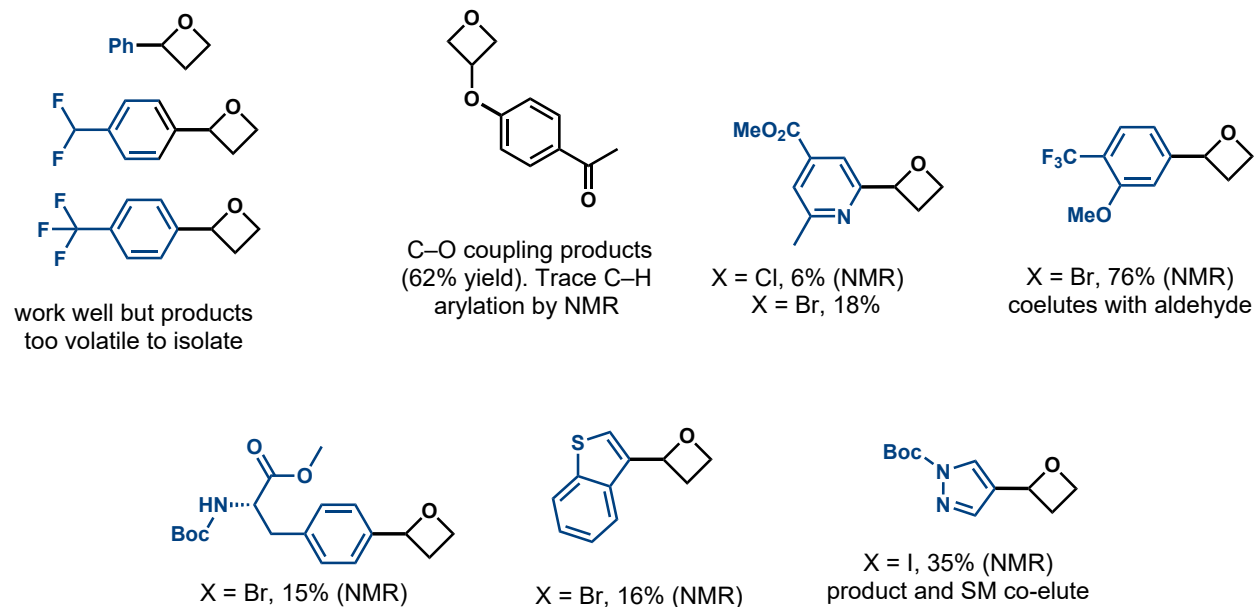

**Figure S2.** Additional substrates that were not isolated in pure form.

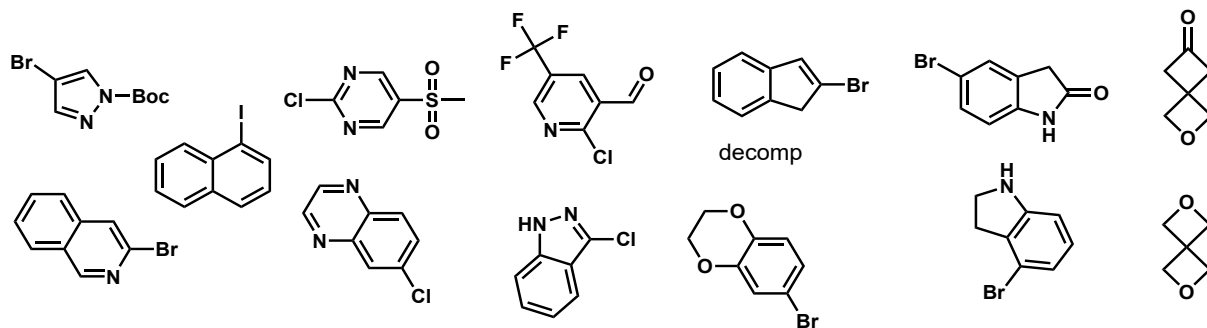

**Figure S3.** Substrates that did not couple under the standard reaction conditions.

## V. Reaction Kinetics

Parallel experiments were set up according to General Procedure A and quenched at the indicated time points. The reactions were analyzed by UPLC and calibrated with authentic samples of product and starting material. Reactions were conducted in duplicate.

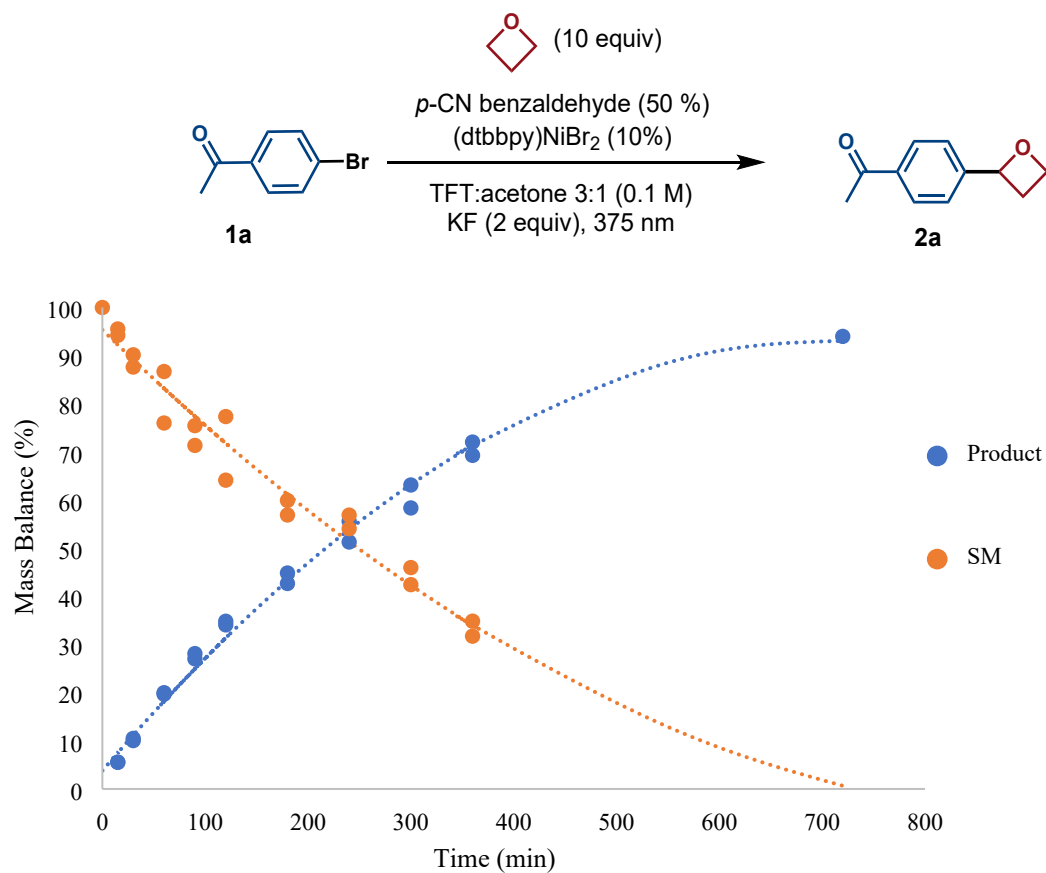

**Figure S4.** Reaction kinetics measured by UPLC analysis in duplicate.

## VI. Compound Characterization

### 1-(4-(oxetan-2-yl)phenyl)ethan-1-one (2a)

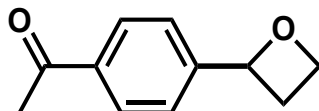

**2a**

Synthesized following General Procedure B starting with 4-bromoacetophenone (0.3 mmol). A colorless oil (46 mg, 88%) was obtained after purification by silica gel chromatography.

$^1\text{H}$  NMR (400 MHz,  $\text{CDCl}_3$ )  $\delta$  7.99 (d,  $J$  = 8.4 Hz, 2H), 7.51 (d,  $J$  = 8.2 Hz, 2H), 5.87 (t,  $J$  = 7.6 Hz, 1H), 4.86 (td,  $J$  = 8.0, 5.9 Hz, 1H), 4.69 (dt,  $J$  = 9.2, 5.9 Hz, 1H), 3.09 (dtd,  $J$  = 11.0, 8.1, 5.8 Hz, 1H), 2.70 – 2.55 (m, 4H).  $^{13}\text{C}$  NMR (101 MHz,  $\text{CDCl}_3$ )  $\delta$  197.8, 148.9, 136.5, 128.7, 125.1, 82.2, 68.5, 30.6, 26.7. HRMS (ESI)  $m/z$ :  $[\text{M}+\text{H}]^+$  calculated for  $\text{C}_{11}\text{H}_{13}\text{O}_2^+$  177.0916; found 177.0920.

### 1-(3-(oxetan-2-yl)phenyl)ethan-1-one (2b)

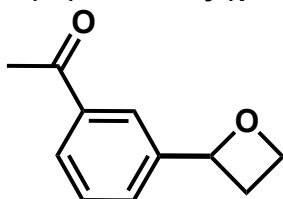

**2b**

Synthesized following General Procedure B starting with 3-bromoacetophenone (0.2 mmol). A colorless oil (23 mg, 65%) was obtained after purification by silica gel chromatography.

$^1\text{H}$  NMR (400 MHz,  $\text{CDCl}_3$ )  $\delta$  8.01 (t,  $J$  = 1.9 Hz, 1H), 7.90 (dt,  $J$  = 7.8, 1.5 Hz, 1H), 7.66 (d,  $J$  = 7.9 Hz, 1H), 7.50 (t,  $J$  = 7.6 Hz, 1H), 5.87 (t,  $J$  = 7.5 Hz, 1H), 4.87 (td,  $J$  = 8.1, 5.9 Hz, 1H), 4.69 (dt,  $J$  = 9.2, 5.8 Hz, 1H), 3.08 (dtd,  $J$  = 11.0, 8.0, 5.7 Hz, 1H), 2.73 – 2.59 (m, 1H), 2.63 (s, 3H).  $^{13}\text{C}$  NMR (101 MHz,  $\text{CDCl}_3$ )  $\delta$  198.1, 144.3, 137.4, 129.9, 128.9, 127.8, 124.9, 82.3, 68.4, 30.7, 26.8. HRMS (ESI)  $m/z$ :  $[\text{M}+\text{H}]^+$  calculated for  $\text{C}_{11}\text{H}_{13}\text{O}_2^+$  177.0916; found 177.0918.

### 6-(oxetan-2-yl)chroman-4-one (2c)

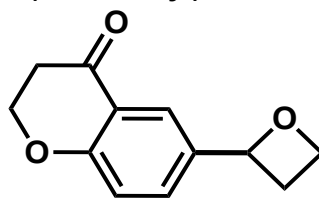

**2c**

Synthesized following General Procedure B starting with 6-bromochroman-4-one (0.2 mmol). A colorless oil (16 mg, 38%) was obtained after purification by silica gel chromatography.



$^1\text{H}$  NMR (400 MHz,  $\text{CDCl}_3$ )  $\delta$  7.96 (d,  $J$  = 2.3 Hz, 1H), 7.66 (dd,  $J$  = 8.6, 2.3 Hz, 1H), 7.04 (d,  $J$  = 8.6 Hz, 1H), 5.79 (t,  $J$  = 7.5 Hz, 1H), 4.84 (td,  $J$  = 8.1, 5.9 Hz, 1H), 4.67 (dt,  $J$  = 9.2, 5.7 Hz, 1H), 4.57 (dd,  $J$  = 6.9, 6.0 Hz, 2H), 3.02 (dtd,  $J$  = 11.1, 8.0, 5.6 Hz, 1H), 2.85 (dd,  $J$  = 7.0, 5.9 Hz, 2H), 2.68 (dddd,  $J$  = 11.1, 9.3, 7.9, 7.3 Hz, 1H).  $^{13}\text{C}$  NMR (101 MHz,  $\text{CDCl}_3$ )  $\delta$  191.7, 161.6, 136.7, 133.5, 124.2, 121.0, 118.3, 82.2, 68.1, 67.1, 37.8, 30.7. HRMS (ESI)  $m/z$ :  $[\text{M}+\text{H}]^+$  calculated for  $\text{C}_{12}\text{H}_{13}\text{O}_3^+$  205.0865; found 205.0868.

#### 2-(3-bromo-4-methylphenyl)oxetane (2e)

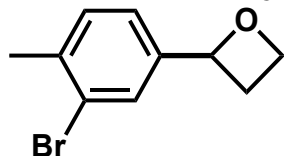

#### 2e

Synthesized following General Procedure B starting with 2-bromo-4-iodo-1-methylbenzene (0.2 mmol). A colorless oil (18 mg, 39%) was obtained after purification by silica gel chromatography.

$^1\text{H}$  NMR (400 MHz,  $\text{CDCl}_3$ )  $\delta$  7.63 (s, 1H), 7.25 - 7.22 (m, 2H), 5.74 (t,  $J$  = 7.5 Hz, 1H), 4.81 (td,  $J$  = 8.0, 5.9 Hz, 1H), 4.65 (dt,  $J$  = 9.2, 5.8 Hz, 1H), 3.01 (dtd,  $J$  = 11.0, 8.0, 5.7 Hz, 1H), 2.62 (dddd,  $J$  = 11.1, 9.2, 7.8, 7.1 Hz, 1H), 2.40 (s, 3H).  $^{13}\text{C}$  NMR (101 MHz,  $\text{CDCl}_3$ )  $\delta$  143.1, 137.3, 130.9, 129.2, 125.1, 124.1, 82.00, 68.3, 30.8, 22.7. HRMS (ESI)  $m/z$ :  $[\text{M}+\text{H}]^+$  calculated for  $\text{C}_{10}\text{H}_{12}\text{BrO}^+$  227.0072; found 227.0065.

#### 4-((2-fluoro-4-(oxetan-2-yl)phenyl)sulfonyl)morpholine (2f)

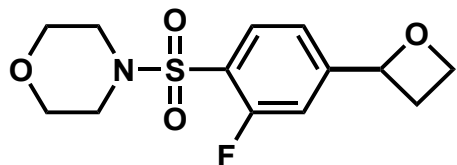

#### 2f

Synthesized following General Procedure B starting with 4-((4-bromo-2-fluorophenyl)sulfonyl)morpholine (0.3 mmol). A colorless oil (48 mg, 53%) was obtained after purification by silica gel chromatography.

$^1\text{H}$  NMR (400 MHz,  $\text{CDCl}_3$ )  $\delta$  7.83 (dd,  $J$  = 8.1, 6.9 Hz, 1H), 7.34 (dd,  $J$  = 10.8, 1.6 Hz, 1H), 7.30 - 7.27 (m, 1H), 5.84 (t,  $J$  = 7.6 Hz, 1H), 4.87 (td,  $J$  = 7.9, 6.0 Hz, 1H), 4.68 (dt,  $J$  = 9.2, 5.9 Hz, 1H), 3.79 - 3.72 (m, 4H), 3.23 - 3.06 (m, 5H), 2.60 (ddt,  $J$  = 11.2, 9.2, 7.3 Hz, 1H).  $^{19}\text{F}$  NMR (377 MHz,  $\text{CDCl}_3$ )  $\delta$  -106.58.  $^{13}\text{C}$  NMR (101 MHz,  $\text{CDCl}_3$ )  $\delta$  159.4 (d,  $J$  = 257.6 Hz), 152.5 (d,  $J$  = 7.4 Hz), 131.7, 123.4 (d,  $J$  = 15.1 Hz), 120.6 (d,  $J$  = 3.4 Hz), 113.8 (d,  $J$  = 23.1 Hz), 81.1 (d,  $J$  = 1.5 Hz), 68.6, 66.4, 45.8 (d,  $J$  = 2.0 Hz), 30.4. HRMS (ESI)  $m/z$ :  $[\text{M}+\text{H}]^+$  calculated for  $\text{C}_{13}\text{H}_{17}\text{FNO}_4\text{S}^+$  302.0862; found 302.0861.

**6-(oxetan-2-yl)-2,3-dihydrobenzo[b]thiophene 1,1-dioxide (2g)**

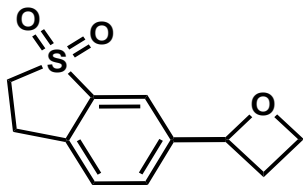

**2g**

Synthesized following General Procedure B starting with 6-bromo-2,3-dihydrobenzo[b]thiophene 1,1-dioxide (0.2 mmol). A colorless oil (18 mg, 41%) was obtained after purification by silica gel chromatography.

$^1\text{H}$  NMR (400 MHz,  $\text{CDCl}_3$ )  $\delta$  7.81 (dd,  $J = 1.6, 0.7$  Hz, 1H), 7.68 - 7.61 (m, 1H), 7.40 (dt,  $J = 8.0, 0.9$  Hz, 1H), 5.86 (t,  $J = 7.5$  Hz, 1H), 4.85 (td,  $J = 8.0, 6.0$  Hz, 1H), 4.67 (dt,  $J = 9.2, 5.9$  Hz, 1H), 3.52 (ddd,  $J = 7.3, 6.3, 0.8$  Hz, 2H), 3.39 (t,  $J = 6.9$  Hz, 2H), 3.09 (dtd,  $J = 11.1, 8.1, 5.8$  Hz, 1H), 2.60 (dddd,  $J = 11.2, 9.2, 7.8, 7.1$  Hz, 1H).  $^{13}\text{C}$  NMR (101 MHz,  $\text{CDCl}_3$ )  $\delta$  145.4, 139.2, 136.5, 130.4, 127.4, 118.1, 81.8, 68.4, 50.9, 30.7, 25.2. HRMS (ESI)  $m/z$ :  $[\text{M}+\text{H}]^+$  calculated for  $\text{C}_{11}\text{H}_{13}\text{O}_3\text{S}^+$  225.0585; found 275.0587.

**2-fluoro-4-(oxetan-2-yl)benzonitrile (2h)**

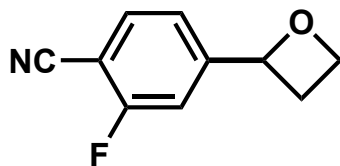

**2h**

Synthesized following General Procedure B starting with 4-bromo-2-fluorobenzonitrile (0.2 mmol). A colorless oil (24 mg, 68%) was obtained after purification by silica gel chromatography.

$^1\text{H}$  NMR (400 MHz,  $\text{CDCl}_3$ )  $\delta$  7.64 (dd,  $J = 8.0, 6.4$  Hz, 1H), 7.36 - 7.28 (m, 1H), 7.28 - 7.22 (m, 1H), 5.82 (t,  $J = 8.1$  Hz, 1H), 4.86 (ddd,  $J = 8.3, 7.6, 6.0$  Hz, 1H), 4.67 (dt,  $J = 9.2, 5.9$  Hz, 1H), 3.13 (dtd,  $J = 11.1, 8.2, 5.9$  Hz, 1H), 2.57 (dddd,  $J = 11.1, 9.2, 7.6, 7.0$  Hz, 1H).  $^{19}\text{F}$  NMR (377 MHz,  $\text{CDCl}_3$ )  $\delta$  -105.85.  $^{13}\text{C}$  NMR (101 MHz,  $\text{CDCl}_3$ )  $\delta$  163.5 (d,  $J = 260.6$  Hz), 152.5 (d,  $J = 7.2$  Hz), 133.8, 121.0 (d,  $J = 3.4$  Hz), 114.0, 112.8 (d,  $J = 20.5$  Hz), 100.3 (d,  $J = 15.8$  Hz), 81.1 (d,  $J = 1.7$  Hz), 68.6, 30.4. HRMS (ESI)  $m/z$ :  $[\text{M}+\text{H}]^+$  calculated for  $\text{C}_{10}\text{H}_9\text{FNO}^+$  178.0668; found 178.0669.

**2-(4-(oxetan-2-yl)phenyl)-1,3,4-oxadiazole (2i)**

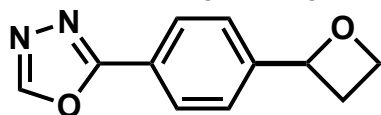

**2i**

Synthesized following General Procedure B starting with 2-(4-bromophenyl)-1,3,4-oxadiazole (0.2 mmol). A colorless oil (26 mg, 64%) was obtained after purification by silica gel chromatography.

$^1\text{H}$  NMR (400 MHz,  $\text{CDCl}_3$ )  $\delta$  8.47 (s, 1H), 8.09 (d,  $J$  = 8.0 Hz, 2H), 7.57 (d,  $J$  = 8.2 Hz, 2H), 5.86 (t,  $J$  = 7.6 Hz, 1H), 4.86 (td,  $J$  = 8.0, 5.9 Hz, 1H), 4.68 (dt,  $J$  = 9.2, 5.8 Hz, 1H), 3.09 (dtd,  $J$  = 11.1, 8.1, 5.8 Hz, 1H), 2.70 – 2.57 (m, 1H).  $^{13}\text{C}$  NMR (101 MHz,  $\text{CDCl}_3$ )  $\delta$  164.6, 152.6, 147.9, 127.4, 125.7, 122.8, 82.1, 68.5, 30.7. HRMS (ESI)  $m/z$ :  $[\text{M}+\text{H}]^+$  calculated for  $\text{C}_{11}\text{H}_{11}\text{N}_2\text{O}_2$  + 203.0821; found 203.0820.

#### 1-(4-(oxetan-2-yl)phenyl)-1H-pyrrole (2j)

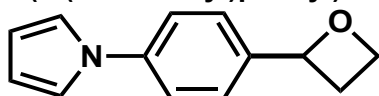

**2j**

Synthesized following General Procedure B starting with 1-(4-bromophenyl)-1H-pyrrole (0.2 mmol). A colorless oil (26 mg, 65%) was obtained after purification by silica gel chromatography.

$^1\text{H}$  NMR (400 MHz,  $\text{CDCl}_3$ )  $\delta$  7.54 – 7.46 (m, 2H), 7.45 – 7.37 (m, 2H), 7.10 (t,  $J$  = 2.2 Hz, 2H), 6.35 (t,  $J$  = 2.2 Hz, 2H), 5.83 (t,  $J$  = 7.5 Hz, 1H), 4.85 (td,  $J$  = 8.0, 5.9 Hz, 1H), 4.67 (dt,  $J$  = 9.2, 5.8 Hz, 1H), 3.05 (dtd,  $J$  = 11.0, 8.0, 5.6 Hz, 1H), 2.69 (dddd,  $J$  = 11.0, 9.2, 7.9, 7.2 Hz, 1H).  $^{13}\text{C}$  NMR (101 MHz,  $\text{CDCl}_3$ )  $\delta$  140.9, 140.3, 126.6, 120.5, 119.3, 110.5, 82.4, 68.2, 30.8. HRMS (ESI)  $m/z$ :  $[\text{M}+\text{H}]^+$  calculated for  $\text{C}_{13}\text{H}_{14}\text{NO}$  + 200.1075; found 200.1077.

#### 1-(4-(oxetan-2-yl)phenyl)cyclopropane-1-carbonitrile (2k)

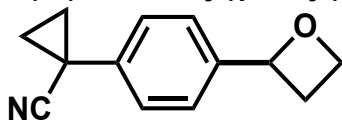

**2k**

Synthesized following General Procedure B starting with 1-(4-bromophenyl)cyclopropane-1-carbonitrile (0.2 mmol). A colorless oil (27 mg, 68%) was obtained after purification by silica gel chromatography.

$^1\text{H}$  NMR (400 MHz,  $\text{CDCl}_3$ )  $\delta$  7.42 (d,  $J$  = 8.0 Hz, 2H), 7.31 (d,  $J$  = 8.1 Hz, 2H), 5.79 (t,  $J$  = 7.5 Hz, 1H), 4.83 (td,  $J$  = 8.0, 5.8 Hz, 1H), 4.65 (dt,  $J$  = 9.3, 5.8 Hz, 1H), 3.03 (dtd,  $J$  = 11.1, 8.0, 5.6 Hz, 1H), 2.69 – 2.55 (m, 1H), 1.73 (q,  $J$  = 5.0 Hz, 2H), 1.41 (q,  $J$  = 5.0 Hz, 2H).  $^{13}\text{C}$  NMR (101 MHz,  $\text{CDCl}_3$ )  $\delta$  143.2, 135.6, 126.0, 125.8, 122.6, 82.3, 68.3, 30.7, 18.2, 13.7. HRMS  $m/z$ :  $[\text{M}+\text{Na}]^+$  calcd. for  $\text{C}_{13}\text{H}_{13}\text{NONa}$ , 222.0895; found 222.0903.

***tert*-butyl-5-(oxetan-2-yl)-1H-indole-1-carboxylate (2l)**

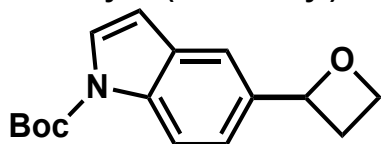

**2l**

Synthesized following General Procedure B starting with *tert*-butyl 5-bromo-1H-indole-1-carboxylate (0.2 mmol). A colorless oil (28 mg, 51%) was obtained after purification by silica gel chromatography.

<sup>1</sup>H NMR (400 MHz, CDCl<sub>3</sub>) δ 8.15 (d, *J* = 8.6 Hz, 1H), 7.66 (dd, *J* = 1.7, 0.8 Hz, 1H), 7.60 (d, *J* = 3.7 Hz, 1H), 7.39 (dd, *J* = 8.6, 1.7 Hz, 1H), 6.57 (dd, *J* = 3.7, 0.8 Hz, 1H), 5.91 (t, *J* = 7.5 Hz, 1H), 4.85 (td, *J* = 8.0, 5.8 Hz, 1H), 4.69 (dt, *J* = 9.2, 5.7 Hz, 1H), 3.05 (dtd, *J* = 11.0, 8.0, 5.6 Hz, 1H), 2.71 (dddd, *J* = 11.0, 9.2, 7.9, 7.2 Hz, 1H), 1.67 (s, 9H). <sup>13</sup>C NMR (101 MHz, CDCl<sub>3</sub>) δ 149.7, 138.1, 134.9, 130.7, 126.4, 121.8, 117.8, 115.2, 107.4, 83.7, 83.3, 68.1, 31.2, 28.2. HRMS (ESI) *m/z*: [M+H]<sup>+</sup> calculated for C<sub>16</sub>H<sub>20</sub>NO<sub>3</sub><sup>+</sup> 274.1443; found 274.1442.

**2-(oxetan-2-yl)benzo[*d*]thiazole (2m)**

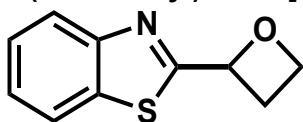

**2m**

Synthesized following General Procedure B starting with 2-bromobenzo[*d*]thiazole (0.2 mmol). A colorless oil (23 mg, 59%) was obtained after purification by silica gel chromatography.

<sup>1</sup>H NMR (400 MHz, CDCl<sub>3</sub>) δ 7.94 (ddd, *J* = 8.2, 1.3, 0.7 Hz, 1H), 7.88 (ddd, *J* = 7.9, 1.3, 0.6 Hz, 1H), 7.43 (ddd, *J* = 8.3, 7.2, 1.3 Hz, 1H), 7.34 (ddd, *J* = 8.3, 7.2, 1.2 Hz, 1H), 6.04 (dd, *J* = 8.3, 6.5 Hz, 1H), 4.89 – 4.74 (m, 2H), 3.19 (dtd, *J* = 11.5, 8.4, 6.4 Hz, 1H), 2.82 (dddd, *J* = 11.4, 9.0, 7.3, 6.5 Hz, 1H). <sup>13</sup>C NMR (101 MHz, CDCl<sub>3</sub>) δ 175.2, 153.5, 134.9, 126.2, 125.1, 123.1, 122.0, 80.4, 69.9, 29.4. HRMS (ESI) *m/z*: [M+H]<sup>+</sup> calculated for C<sub>10</sub>H<sub>10</sub>NOS<sup>+</sup> 192.0483; found 192.0488.

**1-(5-(oxetan-2-yl)thiophen-2-yl)ethan-1-one (2n)**

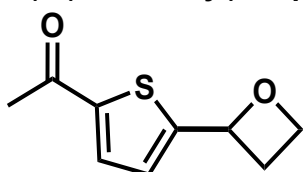

**2n**

Synthesized following General Procedure B starting with 1-(5-bromothiophen-2-yl)ethan-1-one (0.2 mmol). A colorless oil (16 mg, 44%) was obtained after purification by silica gel chromatography.

$^1\text{H}$  NMR (400 MHz,  $\text{CDCl}_3$ )  $\delta$  7.59 (d,  $J$  = 3.8 Hz, 1H), 7.04 (dd,  $J$  = 3.8, 0.8 Hz, 1H), 5.95 (t,  $J$  = 7.3 Hz, 1H), 4.79 (td,  $J$  = 8.0, 6.0 Hz, 1H), 4.70 (dt,  $J$  = 9.1, 5.9 Hz, 1H), 3.12 (dtd,  $J$  = 11.3, 8.1, 6.0 Hz, 1H), 2.76 (dddd,  $J$  = 11.3, 9.1, 7.7, 6.9 Hz, 1H), 2.55 (s, 3H).  $^{13}\text{C}$  NMR (101 MHz,  $\text{CDCl}_3$ )  $\delta$  190.7, 156.4, 143.9, 132.4, 124.65, 78.5, 68.3, 31.5, 26.7. HRMS (ESI)  $m/z$ :  $[\text{M}+\text{H}]^+$  calculated for  $\text{C}_9\text{H}_{10}\text{O}_2\text{S}^+$  183.0480; found 183.0475.

### 3-methyl-5-(oxetan-2-yl)picolinonitrile (2o)

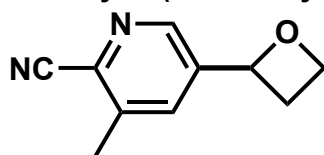

**2o**

Synthesized following General Procedure B starting with 5-bromo-3-methylpicolinonitrile (0.2 mmol). A colorless oil (25 mg, 72%) was obtained after purification by silica gel chromatography.

$^1\text{H}$  NMR (400 MHz,  $\text{CDCl}_3$ )  $\delta$  8.51 (d,  $J$  = 2.0 Hz, 1H), 7.78 (d,  $J$  = 2.0 Hz, 1H), 5.87 (t,  $J$  = 7.6 Hz, 1H), 4.89 (td,  $J$  = 8.0, 6.0 Hz, 1H), 4.69 (dt,  $J$  = 9.2, 5.9 Hz, 1H), 3.14 (dtd,  $J$  = 11.2, 8.2, 5.9 Hz, 1H), 2.69 – 2.56 (m, 4H).  $^{13}\text{C}$  NMR (101 MHz,  $\text{CDCl}_3$ )  $\delta$  145.6, 142.5, 138.5, 134.6, 133.1, 116.4, 79.7, 68.8, 30.4, 18.7. HRMS  $m/z$ :  $[\text{M}+\text{H}]^+$  calcd. for  $\text{C}_{10}\text{H}_{10}\text{N}_2\text{O}$ , 175.0871; found 175.0869.

### 4-(5-(4-(oxetan-2-yl)phenyl)-3-(trifluoromethyl)-1H-pyrazol-1-yl)benzenesulfonamide (2p)

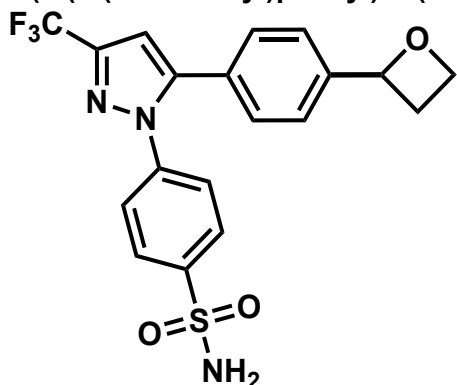

**2p**

Synthesized following General Procedure B starting with 4-(5-(4-bromophenyl)-3-(trifluoromethyl)-1H-pyrazol-1-yl)benzenesulfonamide (0.1 mmol). A colorless oil (27 mg, 63%) was obtained after purification by silica gel chromatography.

$^1\text{H}$  NMR (400 MHz,  $\text{CDCl}_3$ )  $\delta$  7.94 – 7.81 (m, 2H), 7.55 – 7.40 (m, 4H), 7.25 (d,  $J$  = 6.4 Hz, 1H), 6.78 (s, 1H), 5.82 (t,  $J$  = 7.5 Hz, 1H), 5.08 (s, 2H), 4.85 (td,  $J$  = 8.0, 5.9 Hz, 1H), 4.66 (dt,  $J$  = 9.3, 5.8 Hz, 1H), 3.06 (dtd,  $J$  = 11.1, 8.1, 5.7 Hz, 1H), 2.73 – 2.58 (m, 1H).  $^{19}\text{F}$  NMR (377 MHz,  $\text{CDCl}_3$ )  $\delta$  -62.44.  $^{13}\text{C}$  NMR (101 MHz,  $\text{CDCl}_3$ )  $\delta$  145.1, 144.9, 144.2 (q,  $J$  = 38.6 Hz), 142.4, 141.5, 129.0,

128.0, 127.6, 126.0, 125.6, 121.0 (q,  $J = 268$  Hz), 106.7, 82.3, 68.4, 30.6. HRMS (ESI)  $m/z$ :  $[M+H]^+$  calculated for  $C_{19}H_{17}F_3N_3O_3S^+$  424.0943; found 424.0940.

**Ethyl 4-(8-chloro-3-(oxetan-2-yl)-5,6-dihydro-11H-benzo[5,6]cyclohepta[1,2-b]pyridin-11-ylidene)piperidine-1-carboxylate (2q)**

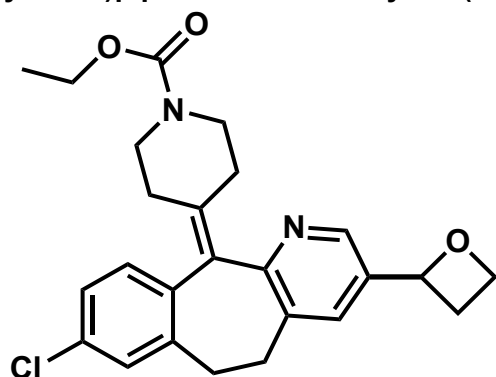

**2q**

Synthesized following General Procedure B starting with ethyl 4-(3-bromo-8-chloro-5,6-dihydro-11H-benzo[5,6]cyclohepta[1,2-b]pyridin-11-ylidene)piperidine-1-carboxylate (0.2 mmol). A colorless oil (18 mg, 21%) was obtained after purification by reverse phase preparative HPLC. The product was isolated as the TFA salt.

$^1H$  NMR (400 MHz, DMSO)  $\delta$  8.46 (dd,  $J = 9.8, 2.0$  Hz, 1H), 7.90 (d,  $J = 8.1$  Hz, 1H), 7.35 (dd,  $J = 4.0, 2.3$  Hz, 1H), 7.25 (dd,  $J = 8.1, 2.3$  Hz, 1H), 7.11 (d,  $J = 8.2$  Hz, 1H), 5.77 (td,  $J = 7.5, 1.8$  Hz, 1H), 4.69 (td,  $J = 8.0, 5.7$  Hz, 1H), 4.58 (dtd,  $J = 9.2, 5.7, 1.4$  Hz, 1H), 4.04 (q,  $J = 7.1$  Hz, 2H), 3.70 – 3.65 (m, 5H), 3.43 – 3.29 (m, 2H), 3.20 – 3.10 (m, 2H), 3.05 – 2.80 (m, 2H), 2.70 – 2.55 (m, 1H), 2.38 – 2.13 (m, 2H), 1.17 (t,  $J = 7.1$  Hz, 3H).  $^{13}C$  NMR (101 MHz, DMSO)  $\delta$  158.9, 158.6, 158.2, 155.0, 142.7, 140.7, 140.7, 137.9, 132.3, 131.1, 129.5, 126.3, 79.8, 79.7, 68.1, 66.1, 61.7, 61.2, 44.7, 44.7, 31.1, 31.0, 30.8, 30.0, 15.1. HRMS (ESI)  $m/z$ :  $[M+H]^+$  calculated for  $C_{25}H_{28}ClN_2O_3^+$  439.1788; found 439.1789.

**5-((1H-1,2,3-triazol-1-yl)methyl)-3-(3-fluoro-4-((S)-oxetan-2-yl)phenyl)oxazolidin-2-one (2r)**

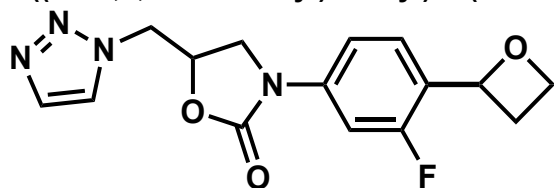

**2r**

Synthesized following General Procedure B starting with 5-((1H-1,2,3-triazol-1-yl)methyl)-3-(3-fluoro-4-iodophenyl)oxazolidin-2-one (0.1 mmol). A colorless oil (25 mg, 79%) was obtained after purification by silica gel chromatography. The compound is obtained as a 1:1 mixture of diastereomers that was not separable by chromatography. Diastereomers could not be unambiguously assigned by NMR but have been explicitly picked where possible.

$^1\text{H}$  NMR (400 MHz,  $\text{CDCl}_3$ )  $\delta$  7.72 (s, 1H), 7.68 (s, 1H), 7.54 (t,  $J$  = 8.3 Hz, 1H), 7.27 (ddd,  $J$  = 18.0, 12.2, 2.3 Hz, 1H), 7.03 (ddd,  $J$  = 19.4, 8.5, 2.2 Hz, 1H), 5.91 (t,  $J$  = 7.5 Hz, 1H), 5.01 (ddd,  $J$  = 10.7, 8.9, 4.5 Hz, 1H), 4.80 – 4.66 (m, 3H), 4.59 (dt,  $J$  = 9.2, 5.9 Hz, 1H), 4.11 (td,  $J$  = 9.1, 1.6 Hz, 1H), 3.87 (ddd,  $J$  = 9.5, 6.2, 1.5 Hz, 1H), 3.00 (dtd,  $J$  = 11.2, 8.1, 5.9 Hz, 1H), 2.55 (ddd,  $J$  = 17.7, 10.6, 7.8 Hz, 1H).  $^{19}\text{F}$  NMR (376 MHz,  $\text{CDCl}_3$ )  $\delta$  -116.76 and -116.78 (pair of diastereomers).  $^{13}\text{C}$  NMR (101 MHz,  $\text{CDCl}_3$ )  $\delta$  159.25 (d,  $J$  = 247.5), 153.2, 138.3 – 137.7 (m), 134.6, 127.6 (d,  $J$  = 2.9 Hz) and 127.5 (d,  $J$  = 2.9 Hz) (pair of diastereomers), 126.9 (d,  $J$  = 14.1 Hz), 125.1, 113.50 (d,  $J$  = 10.4) and 113.47 (d,  $J$  = 10.4) (pair of diastereomers), 106.0 (d,  $J$  = 26.8) and 105.9 (d,  $J$  = 26.8) (pair of diastereomers), 70.5, 68.8, 52.0, 47.3, 47.2, 29.9. HRMS (ESI)  $m/z$ :  $[\text{M}+\text{H}]^+$  calculated for  $\text{C}_{15}\text{H}_{16}\text{FN}_4\text{O}_3^+$  319.1206; found 319.1208.

### 1-(4-(3-hydroxy-3-methyloxetan-2-yl)phenyl)ethan-1-one (3a)

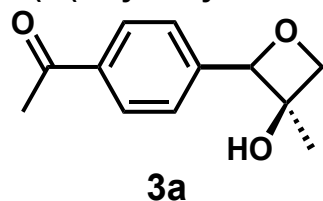

Synthesized following General Procedure B starting with 4-bromoacetophenone (0.2 mmol) and replacing oxetane with 3-methyloxetan-3-ol. A colorless oil (16 mg, 39%, 10:1 d.r.) was obtained after purification by silica gel chromatography. The minor diastereomer could not fully be separated by chromatography and small peaks for the minor diastereomer remain in the NMR spectra.

$^1\text{H}$  NMR (400 MHz,  $\text{CDCl}_3$ )  $\delta$  8.08 - 8.00 (m, 2H), 7.51 - 7.45 (m, 2H), 5.60 (s, 1H), 4.69 (d,  $J$  = 6.9 Hz, 1H), 4.58 (d,  $J$  = 6.9 Hz, 1H), 2.62 (s, 3H), 1.70 (s, 3H).  $^{13}\text{C}$  NMR (101 MHz,  $\text{CDCl}_3$ )  $\delta$  197.7, 142.6, 137.0, 128.7, 126.0, 92.8, 83.7, 74.2, 26.7, 25.7. HRMS (ESI)  $m/z$ :  $[\text{M}+\text{H}]^+$  calculated for  $\text{C}_{12}\text{H}_{15}\text{O}_3^+$  207.1021; found 207.1017.

### 1-(4-(3-(hydroxymethyl)oxetan-2-yl)phenyl)ethan-1-one (3b)

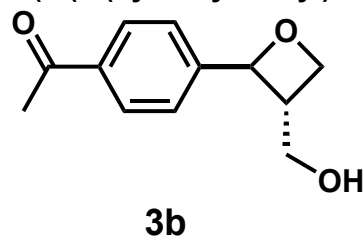

Synthesized following General Procedure B starting with 4-bromoacetophenone (0.2 mmol) and replacing oxetane with oxetan-3-ylmethanol. A colorless oil (20 mg, 48%, 10:1 d.r.) was obtained after purification by silica gel chromatography. The minor diastereomer could not fully be separated by chromatography and small peaks for the minor diastereomer remain in the NMR spectra.

$^1\text{H}$  NMR (400 MHz,  $\text{CDCl}_3$ )  $\delta$  7.98 (d,  $J$  = 8.3 Hz, 2H), 7.53 (d,  $J$  = 8.2 Hz, 2H), 5.65 (d,  $J$  = 6.1 Hz, 1H), 4.75 (dd,  $J$  = 8.4, 6.2 Hz, 1H), 4.60 (t,  $J$  = 6.5 Hz, 1H), 3.99 (q,  $J$  = 10.7, 9.6 Hz, 2H), 3.03 (dp,  $J$  = 8.2, 6.5 Hz, 1H), 2.61 (s, 3H), 1.74 (br s, 1H).  $^{13}\text{C}$  NMR (101 MHz,  $\text{CDCl}_3$ )  $\delta$  197.9, 148.1, 136.5, 128.7, 125.0, 84.9, 70.4, 63.5, 45.7, 26.7. HRMS (ESI)  $m/z$ :  $[\text{M}+\text{H}]^+$  calculated for  $\text{C}_{12}\text{H}_{15}\text{O}_3^+$  207.1021; found 207.1017.

### 1-(4-(3-(1-hydroxyethyl)oxetan-2-yl)phenyl)ethan-1-one (3c)

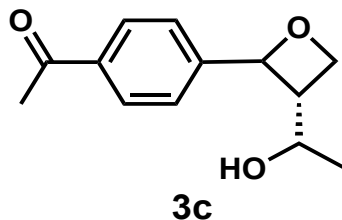

Synthesized following General Procedure B starting with 4-bromoacetophenone (0.2 mmol) and replacing oxetane with 1-(oxetan-3-yl)ethan-1-ol. A colorless oil (11 mg, 26%, 15:1 d.r.) was obtained after purification by silica gel chromatography.

$^1\text{H}$  NMR (400 MHz,  $\text{CDCl}_3$ )  $\delta$  7.98 (d,  $J$  = 8.3 Hz, 2H), 7.56 (d,  $J$  = 8.2 Hz, 2H), 5.75 (d,  $J$  = 6.1 Hz, 1H), 4.71 (dd,  $J$  = 8.4, 6.2 Hz, 1H), 4.53 (t,  $J$  = 6.5 Hz, 1H), 4.27-4.22 (m, 1H), 2.78 (m, 1H), 2.61 (s, 3H), 1.19 (d,  $J$  = 6.3 Hz, 3H).  $^{13}\text{C}$  NMR (101 MHz,  $\text{CDCl}_3$ )  $\delta$  197.6, 144.8, 138.8, 128.9, 125.4, 85.2, 70.3, 69.5, 51.1, 26.9, 21.5. HRMS  $m/z$ :  $[\text{M}+\text{H}]^+$  calcd. for  $\text{C}_{13}\text{H}_{16}\text{O}_3$ , 221.1178; found 221.1175.

#### 1-(4-(3,3-dimethyloxetan-2-yl)phenyl)ethan-1-one (3d)

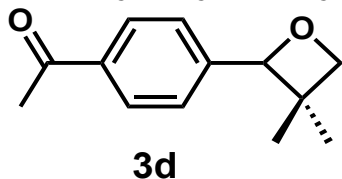

Synthesized following General Procedure B starting with 4-bromoacetophenone (0.2 mmol) and replacing oxetane with 3,3-dimethyloxetane. A colorless oil (18 mg, 44%) was obtained after purification by silica gel chromatography.

$^1\text{H}$  NMR (400 MHz,  $\text{CDCl}_3$ )  $\delta$  8.01 - 7.92 (m, 2H), 7.41 - 7.33 (m, 2H), 5.54 (s, 1H), 4.55 (d,  $J$  = 5.4 Hz, 1H), 4.27 (d,  $J$  = 5.4 Hz, 1H), 2.61 (s, 3H), 1.43 (s, 3H), 0.78 (s, 3H).  $^{13}\text{C}$  NMR (101 MHz,  $\text{CDCl}_3$ )  $\delta$  198.0, 145.9, 136.4, 128.5, 125.3, 91.3, 81.5, 40.9, 27.1, 26.8, 22.6. HRMS (ESI)  $m/z$ :  $[\text{M}+\text{H}]^+$  calculated for  $\text{C}_{13}\text{H}_{17}\text{O}_2^+$  205.1229; found 205.1226.

#### 1-(4-(4,4-diethyloxetan-2-yl)phenyl)ethan-1-one (3e)

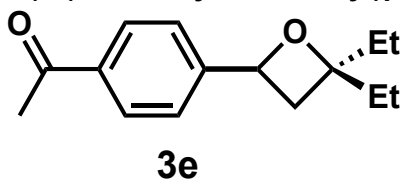

Synthesized following General Procedure B starting with 4-bromoacetophenone (0.2 mmol) and replacing oxetane with 2,2-diethyloxetane. A colorless oil (26 mg, 55%) was obtained after purification by silica gel chromatography.

$^1\text{H}$  NMR (400 MHz,  $\text{CDCl}_3$ )  $\delta$  8.01 - 7.92 (m, 2H), 7.51 - 7.43 (m, 2H), 5.67 - 5.59 (m, 1H), 2.76 (dd,  $J$  = 10.9, 8.3 Hz, 1H), 2.60 (s, 3H), 2.34 - 2.20 (m, 1H), 1.98 - 1.59 (m, 4H), 1.03 (t,  $J$  = 7.5 Hz, 3H), 0.83 (dt,  $J$  = 10.2, 7.5 Hz, 3H).  $^{13}\text{C}$  NMR (101 MHz,  $\text{CDCl}_3$ )  $\delta$  197.8, 149.9, 136.1, 128.6, 124.9, 85.8, 74.6, 38.1, 32.6, 30.7, 26.6, 7.6, 7.3. HRMS (ESI)  $m/z$ :  $[\text{M}+\text{H}]^+$  calculated for  $\text{C}_{15}\text{H}_{21}\text{O}_2^+$  233.1542; found 233.1535.

#### 1-(4-(3-acetyloxetan-2-yl)phenyl)ethan-1-one (3f)



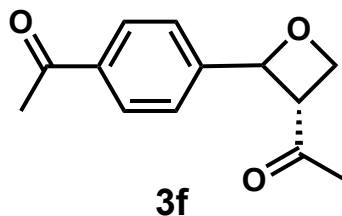

Synthesized following General Procedure B starting with 4-bromoacetophenone (0.2 mmol) and replacing oxetane with 1-(oxetan-3-yl)ethan-1-one. A colorless oil (6 mg, 14%, >20:1 d.r.) was obtained after purification by silica gel chromatography.

$^1\text{H NMR}$  (400 MHz,  $\text{CDCl}_3$ )  $\delta$  8.01 (d,  $J = 8.3$  Hz, 2H), 7.54 (d,  $J = 8.2$  Hz, 2H), 5.89 (d,  $J = 6.1$  Hz, 1H), 4.88 (t,  $J = 6.5$  Hz, 1H), 4.79 (dd,  $J = 8.4, 6.2$  Hz, 1H), 3.76 (m, 1H), 2.62 (s, 3H), 2.19 (s, 3H).  $^{13}\text{C NMR}$  (101 MHz,  $\text{CDCl}_3$ )  $\delta$  204.4, 197.6, 146.8, 137.1, 128.9, 125.2, 82.9, 68.8, 54.6, 28.4, 26.7. HRMS  $m/z$ :  $[\text{M}+\text{H}]^+$  calcd. for  $\text{C}_{13}\text{H}_{14}\text{O}_3$ , 219.1021; found 219.1019.

### 1-(4-(*tert*-butoxymethyl)phenyl)ethan-1-one(3i)

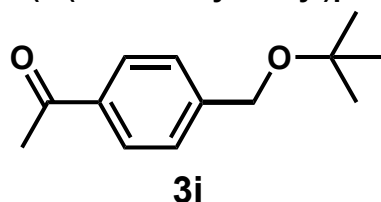

Synthesized following General Procedure B starting with 4-bromoacetophenone (0.2 mmol) and replacing oxetane with methyl *tert*-butyl ether. A colorless oil (15 mg, 36%) was obtained after purification by silica gel chromatography.

$^1\text{H NMR}$  (400 MHz,  $\text{CDCl}_3$ )  $\delta$  7.92 (d,  $J = 8.3$  Hz, 2H), 7.44 (dp,  $J = 7.6, 0.9$  Hz, 2H), 4.51 (s, 2H), 2.59 (s, 3H), 1.30 (s, 9H).  $^{13}\text{C NMR}$  (101 MHz,  $\text{CDCl}_3$ )  $\delta$  198.1, 145.8, 136.2, 128.5, 127.2, 73.9, 63.7, 27.8, 26.8. HRMS (ESI)  $m/z$ :  $[\text{M}+\text{H}]^+$  calculated for  $\text{C}_{13}\text{H}_{19}\text{O}_2^+$  207.1385; found 207.1384.

### 1-(4-((cyclopentyloxy)methyl)phenyl)ethan-1-one (3j)

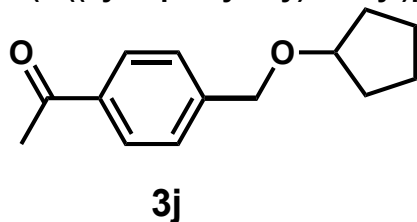

Synthesized following General Procedure B starting with 4-bromoacetophenone (0.2 mmol) and replacing oxetane with cyclopentyl methyl ether. A colorless oil (12 mg, 27%) was obtained after purification by silica gel chromatography.

$^1\text{H NMR}$  (400 MHz,  $\text{CDCl}_3$ )  $\delta$  7.93 (d,  $J = 8.3$  Hz, 2H), 7.43 (dp,  $J = 7.6, 0.9$  Hz, 2H), 4.53 (s, 2H), 4.06 – 3.96 (m, 1H), 2.60 (s, 3H), 1.82 – 1.67 (m, 5H), 1.60 – 1.52 (m, 3H).  $^{13}\text{C NMR}$  (101 MHz,  $\text{CDCl}_3$ )  $\delta$  197.9, 144.8, 136.2, 128.5, 127.3, 81.4, 70.1, 32.3, 26.7, 23.6. HRMS (ESI)  $m/z$ :  $[\text{M}+\text{H}]^+$  calculated for  $\text{C}_{14}\text{H}_{19}\text{O}_2^+$  219.1385; found 219.1386.

### 1-(4-(1,4-dioxan-2-yl)phenyl)ethan-1-one (3l)

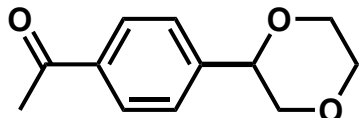

**3l**

Synthesized following General Procedure B starting with 4-bromoacetophenone (0.2 mmol) and replacing oxetane with 1,4-dioxane. (ttbterpy)NiBr<sub>2</sub> was used in place of (dtbbpy)NiBr<sub>2</sub>. One equivalent (100%) *p*-cyanobenzaldehyde was used. K<sub>2</sub>HPO<sub>4</sub> was used instead of KF. A colorless oil (25 mg, 61%) was obtained after purification by silica gel chromatography.

<sup>1</sup>H NMR (400 MHz, CDCl<sub>3</sub>) δ 7.95 (d, *J* = 8.3 Hz, 2H), 7.45 (dp, *J* = 7.6, 0.9 Hz, 2H), 4.69 (dd, *J* = 6.9, 1.0 Hz, 1H), 3.99 – 3.39 (m, 5H), 3.42 (dd, *J* = 9.2, 7.8 Hz, 1H), 2.60 (s, 3H). <sup>13</sup>C NMR (101 MHz, CDCl<sub>3</sub>) δ 197.7, 143.5, 136.8, 128.5, 126.3, 77.4, 72.3, 67.0, 66.4, 26.7. HRMS (ESI) *m/z*: [M+H]<sup>+</sup> calculated for C<sub>12</sub>H<sub>15</sub>O<sub>3</sub><sup>+</sup> 207.1021; found 207.1015.

### 1-(4-(tetrahydrofuran-2-yl)phenyl)ethan-1-one (3m)

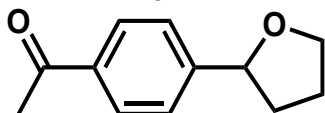

**3m**

Synthesized following General Procedure B starting with 4-bromoacetophenone (0.3 mmol) and replacing oxetane with tetrahydrofuran. One equivalent (100%) *p*-cyanobenzaldehyde was used. K<sub>2</sub>HPO<sub>4</sub> was used instead of KF. A colorless oil (42 mg, 73%) was obtained after purification by silica gel chromatography.

<sup>1</sup>H NMR (400 MHz, CDCl<sub>3</sub>) δ 7.93 (d, *J* = 8.4 Hz, 2H), 7.43 (d, *J* = 8.0 Hz, 2H), 4.95 (t, *J* = 7.2 Hz, 1H), 4.11 (dt, *J* = 8.4, 6.8 Hz, 1H), 3.97 (dt, *J* = 8.3, 6.9 Hz, 1H), 2.60 (s, 3H), 2.37 (dq, *J* = 12.5, 6.7 Hz, 1H), 2.09 – 1.92 (m, 2H), 1.85 – 1.70 (m, 1H). <sup>13</sup>C NMR (101 MHz, CDCl<sub>3</sub>) δ 197.8, 149.2, 136.1, 128.5, 125.6, 80.1, 77.4, 77.0, 76.7, 68.9, 34.7, 26.6, 26.0. HRMS (ESI) *m/z*: [M+H]<sup>+</sup> calculated for C<sub>12</sub>H<sub>15</sub>O<sub>2</sub><sup>+</sup> 191.1072; found 191.1069.

### 1-(4-(1,3-dioxolan-2-yl)phenyl)ethan-1-one (3n)

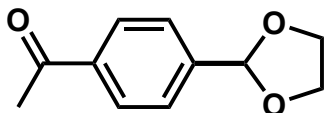

**3n**

Synthesized following General Procedure B starting with 4-bromoacetophenone (0.2 mmol) and replacing oxetane with 1,3-dioxolane. A colorless oil (20 mg, 51%, 3:1 r.r.) was obtained after purification by silica gel chromatography.

<sup>1</sup>H NMR (400 MHz, CDCl<sub>3</sub>) δ 8.01 - 7.98 (m, 2H), 7.63 - 7.54 (m, 2H), 5.89 (s, 1H), 4.20 - 4.03 (m, 4H), 2.63 (s, 3H). <sup>13</sup>C NMR (101 MHz, CDCl<sub>3</sub>) δ 197.9, 128.4, 126.7, 103.0, 96.2, 71.8, 65.4, 26.7. HRMS (ESI) *m/z*: [M+H]<sup>+</sup> calculated for C<sub>11</sub>H<sub>13</sub>O<sub>3</sub><sup>+</sup> 193.0865; found 193.0863.

***tert*-butyl 5-(4-acetylphenyl)-6-oxa-1-azaspiro[3.3]heptane-1-carboxylate (3o-1) and *tert*-butyl 2-(4-acetylphenyl)-6-oxa-1-azaspiro[3.3]heptane-1-carboxylate (3o-2)**

Synthesized following General Procedure B starting with 4-bromoacetophenone (0.2 mmol) and replacing oxetane with *tert*-butyl 6-oxa-1-azaspiro[3.3]heptane-1-carboxylate (5 equiv). Purified by silica gel chromatography.

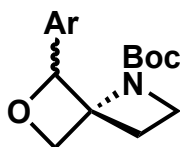

**3o-1**, 1.5:1 d.r.

A colorless oil (10mg, 16%, 1.5:1 d.r.) was obtained.

<sup>1</sup>H NMR – major isomer – (400 MHz, CDCl<sub>3</sub>, 25 °C) δ 8.04 – 7.98 (m, 2H), 7.43 (d, *J* = 8.2 Hz, 2H), 6.22 – 6.17 (m, 1H), 5.35 – 5.19 (m, 1H), 4.63 – 4.53 (m, 1H), 3.78 – 3.64 (m, 1H), 3.61 – 3.51 (m, 1H), 2.63 (s, 3H), 2.00 (ddd, *J* = 12.1, 8.8, 5.6 Hz, 1H), 1.89 – 1.73 (m, 1H), 1.57 (s, 9H). A satisfactory <sup>13</sup>C NMR spectrum could not be obtained at 25 °C due to broadening from the presence of rotamers. The <sup>13</sup>C NMR spectrum was better resolved at 0 °C, but some broadening as well as additional peaks were still observed. <sup>13</sup>C NMR (101 MHz, CDCl<sub>3</sub>, 0 °C) δ 197.2, 154.3, 144.1, 136.7, 128.9, 125.6, 89.9, 88.7, 80.9, 79.4, 71.3, 67.2, 44.0, 28.7 (br), 26.9. HRMS (ESI) *m/z*: [*M*+*H*]<sup>+</sup> calculated for C<sub>18</sub>H<sub>24</sub>NO<sub>4</sub><sup>+</sup> 318.1705; found 318.1699.

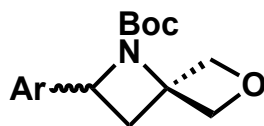

**3o-2**

A colorless oil (30mg, 47%) was obtained.

<sup>1</sup>H NMR (400 MHz, CDCl<sub>3</sub>, 25 °C) δ 7.98 – 7.88 (m, 2H), 7.40 – 7.28 (m, 2H), 5.60 – 5.18 (br m, 2H), 5.08 (br t, *J* = 7.1 Hz, 1H), 4.68 (t, *J* = 6.0 Hz, 2H), 2.93 (dd, *J* = 12.0, 8.5 Hz, 1H), 2.59 (s, 3H), 2.32 (dd, *J* = 12.0, 5.8 Hz, 1H), 1.68 – 1.37 (br m, 9H). A satisfactory <sup>13</sup>C NMR spectrum could not be obtained at 25 °C due to broadening from the presence of rotamers. The <sup>13</sup>C NMR spectrum was better resolved at 0 °C, some broadening as well as additional peaks were still observed. <sup>13</sup>C NMR (101 MHz, CDCl<sub>3</sub>, 0 °C) δ 198.0, 154.5, 146.5, 136.4, 129.0, 125.7,

82.6, 81.6, 80.1, 65.3, 58.9, 38.3, 28.6 (br), 26.9. HRMS (ESI) m/z: [M+H]<sup>+</sup> calculated for C<sub>18</sub>H<sub>24</sub>NO<sub>4</sub><sup>+</sup> 318.1705; found 318.1701.

## VII. Pictures of NMR Spectra

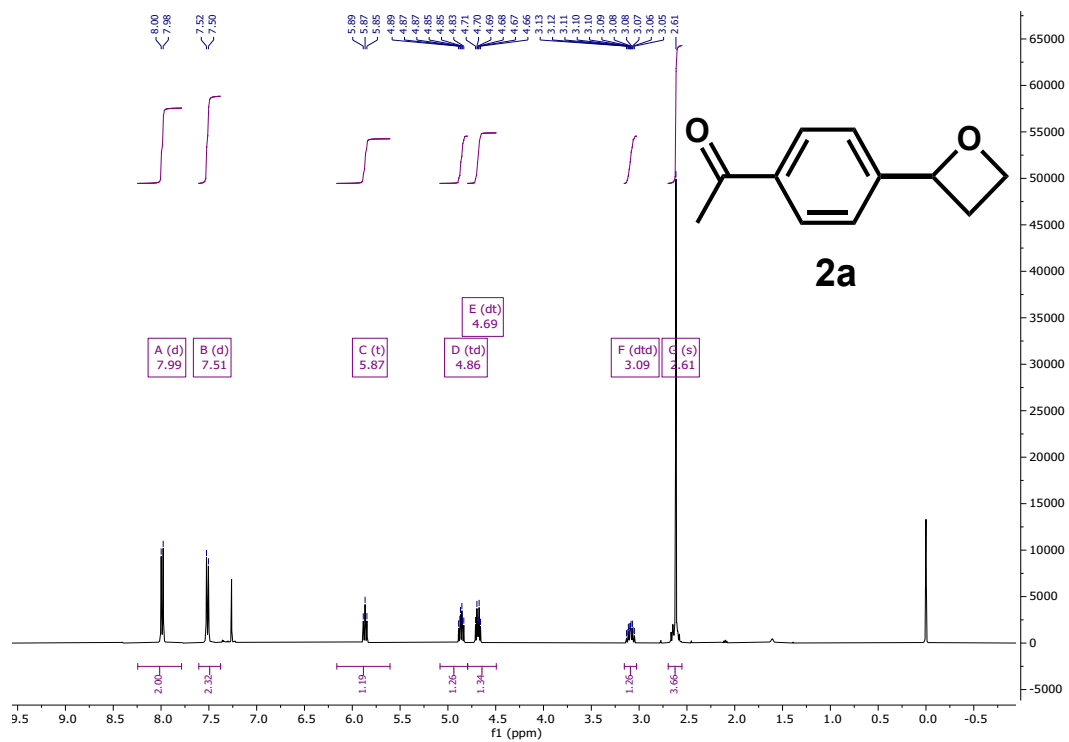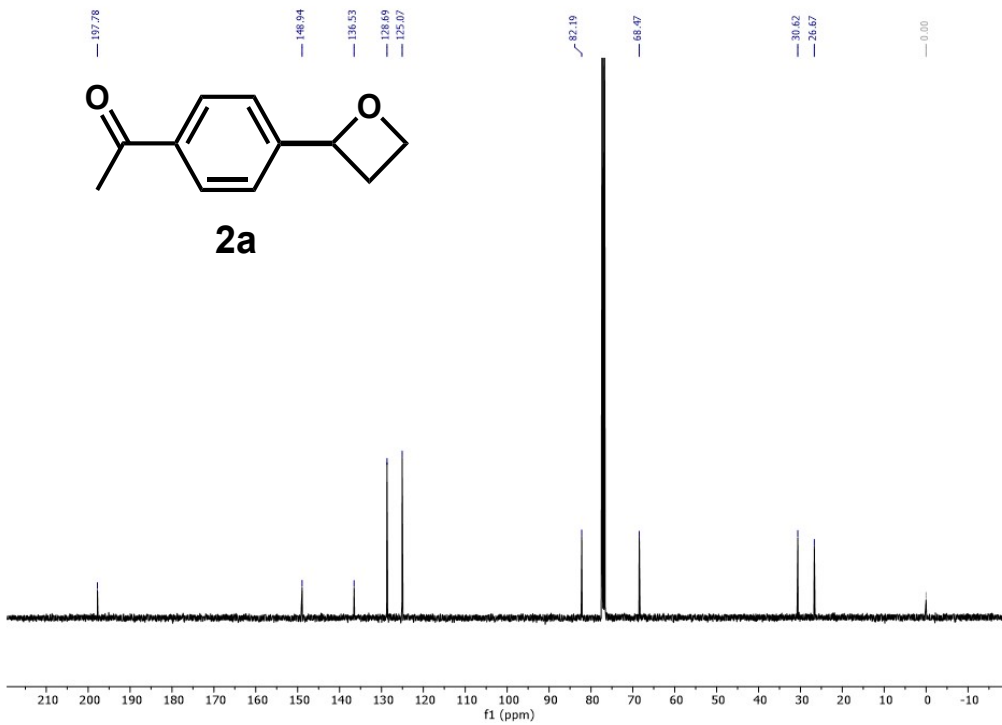

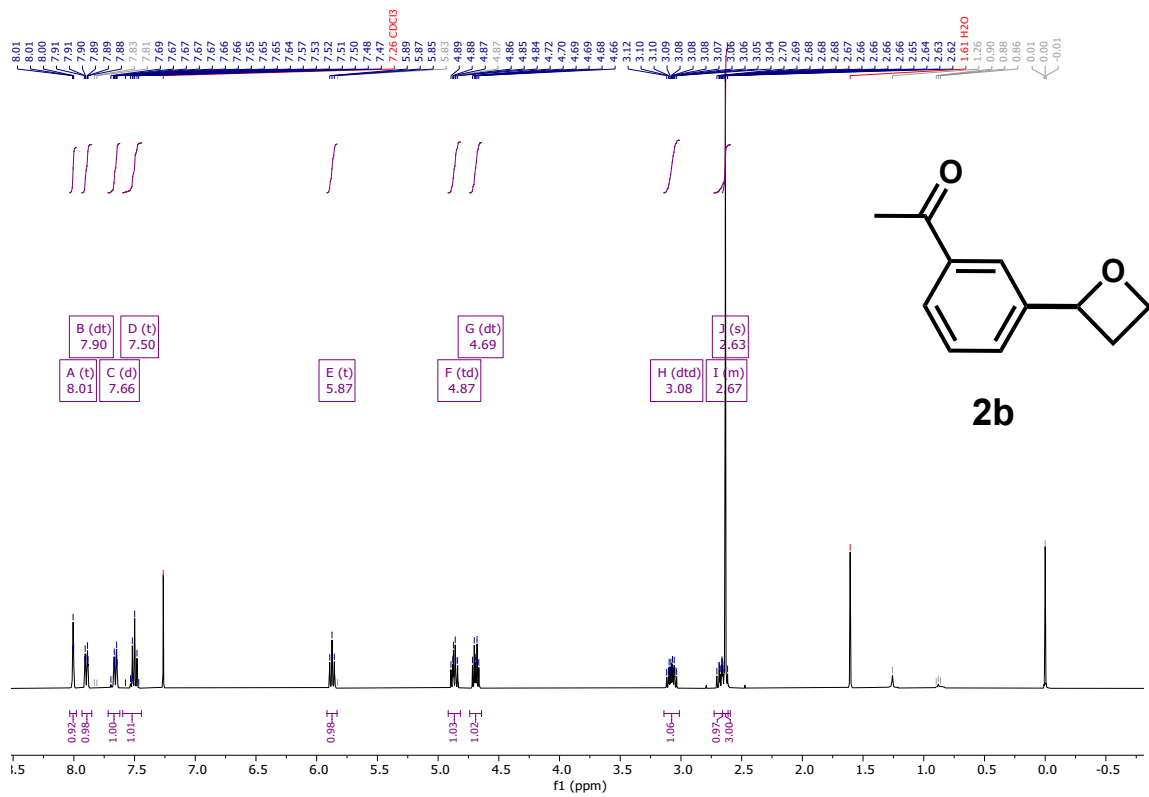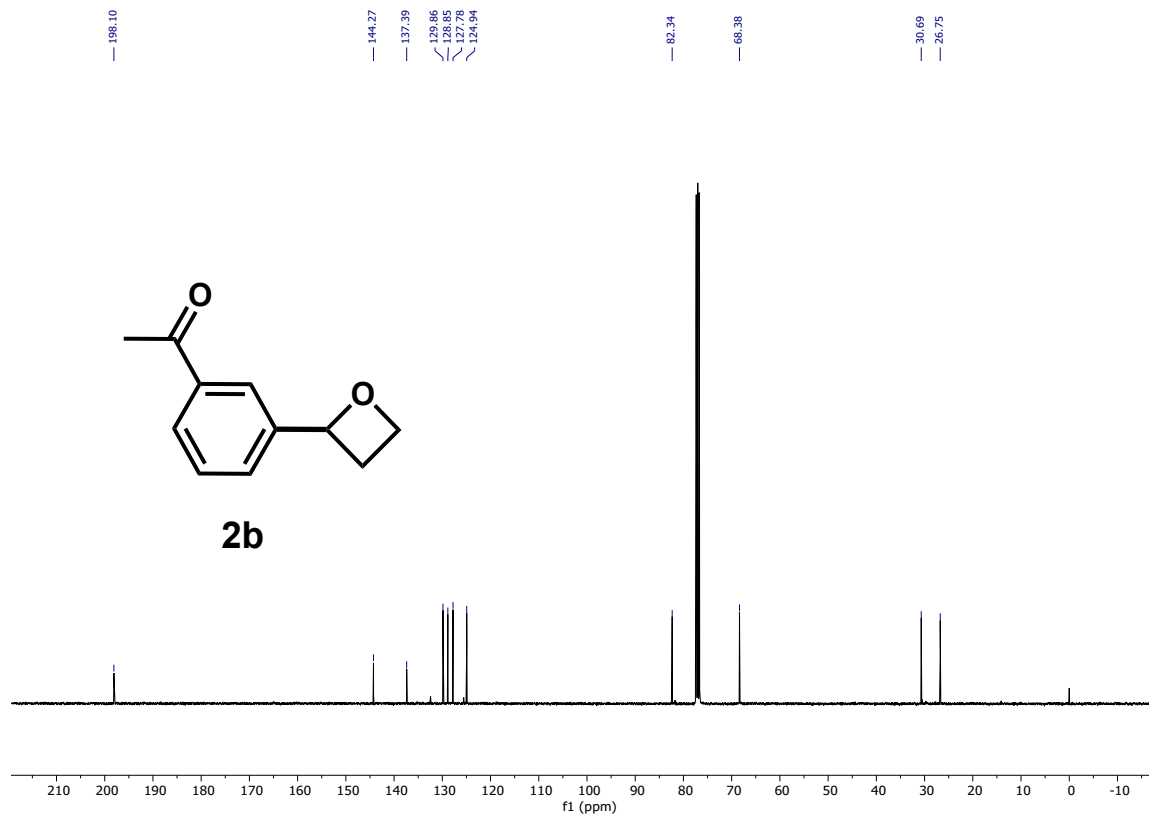

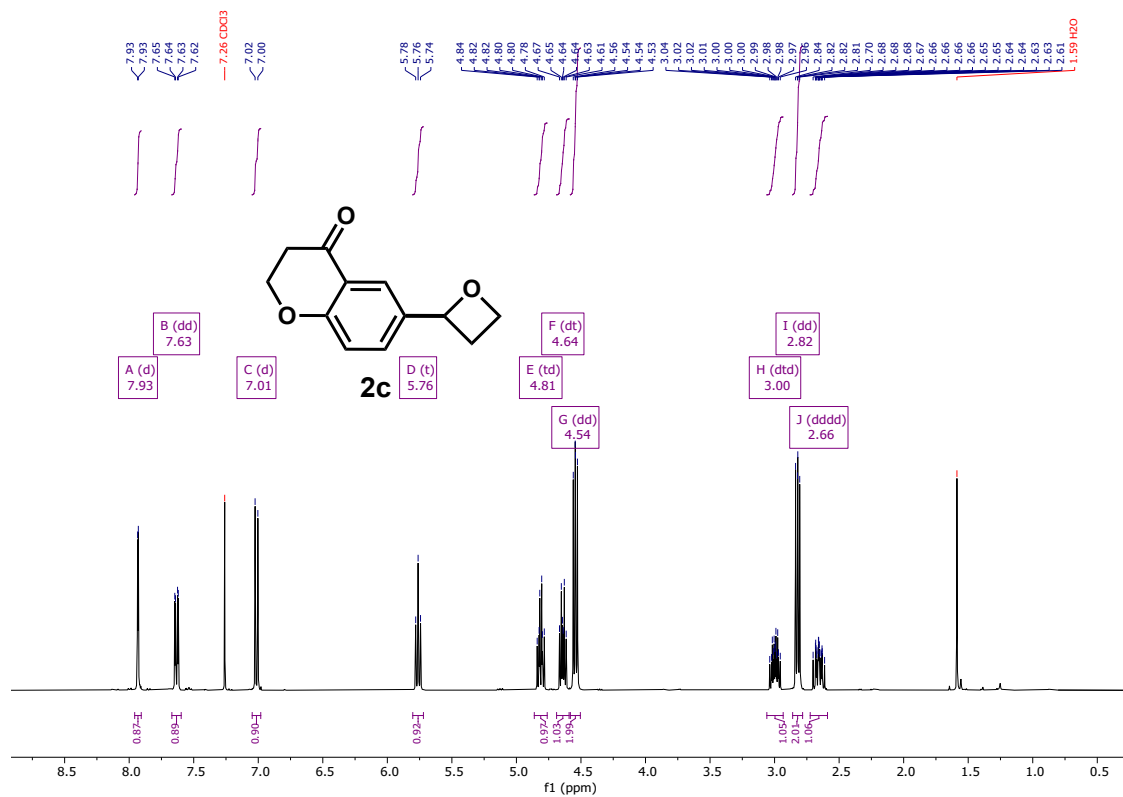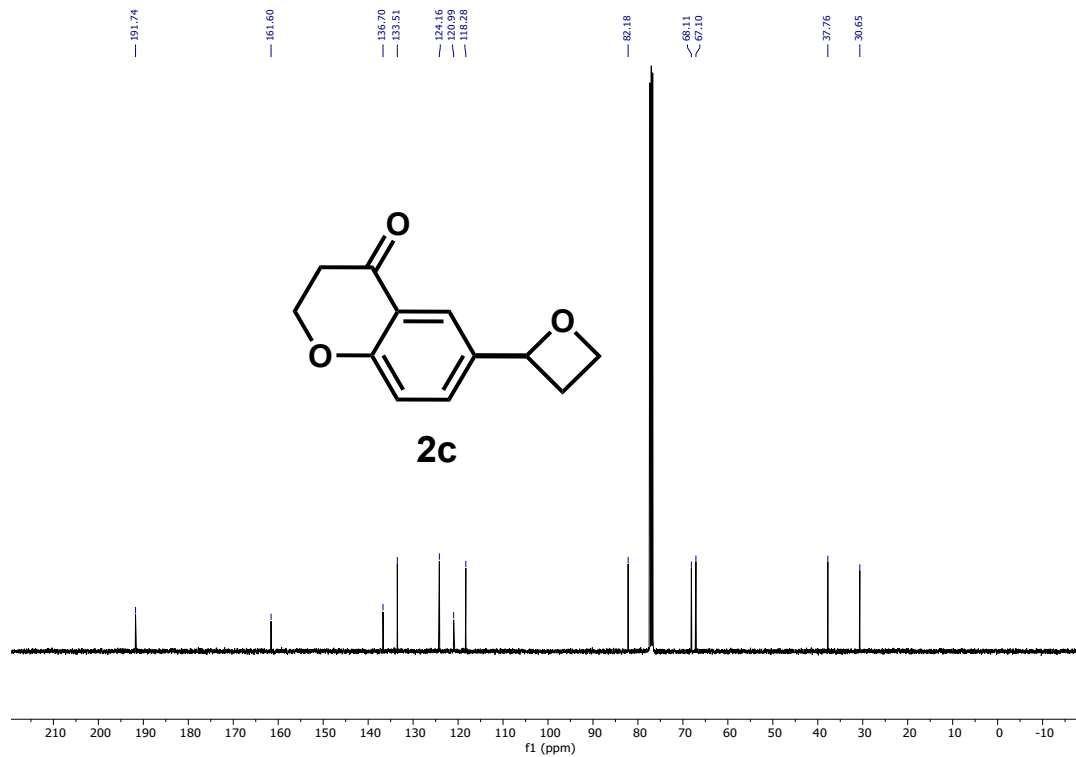

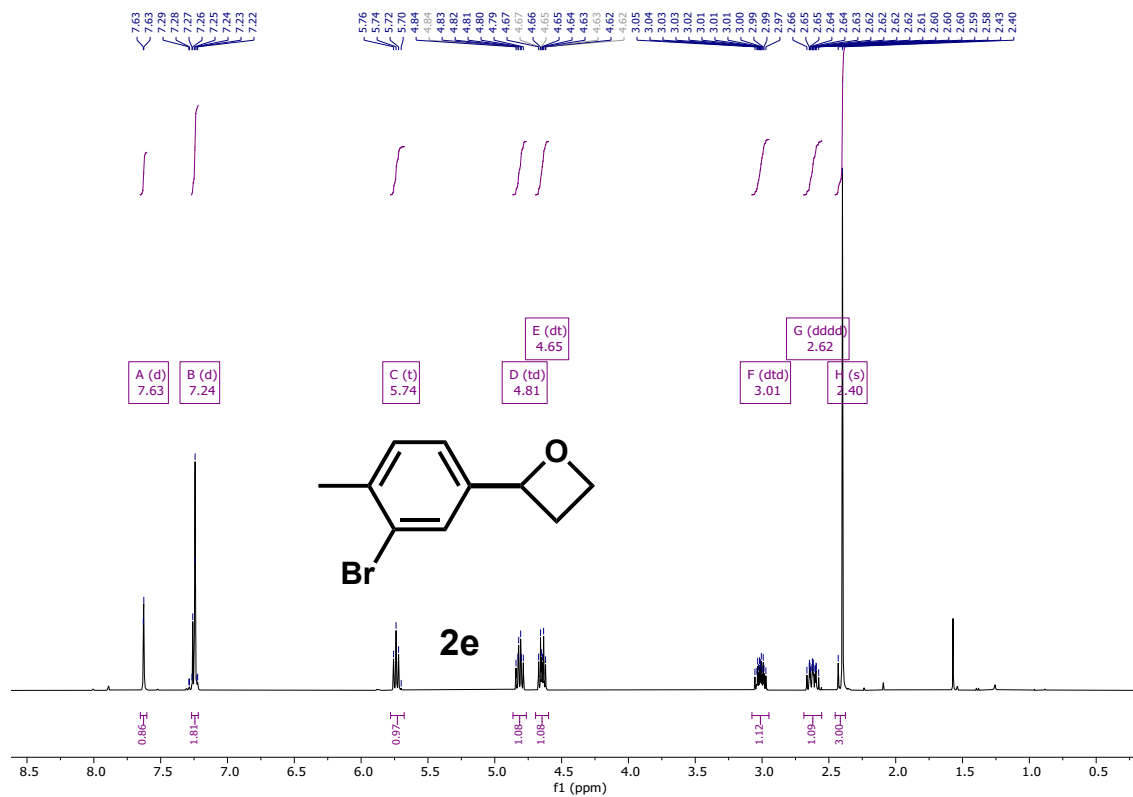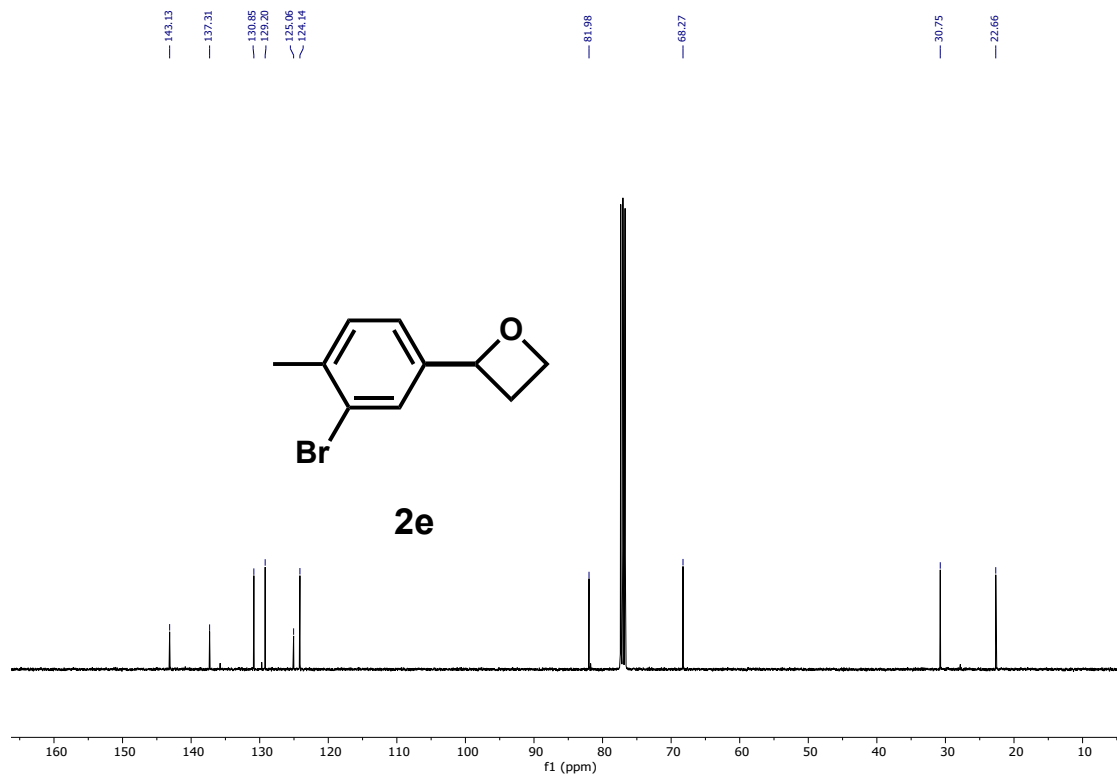



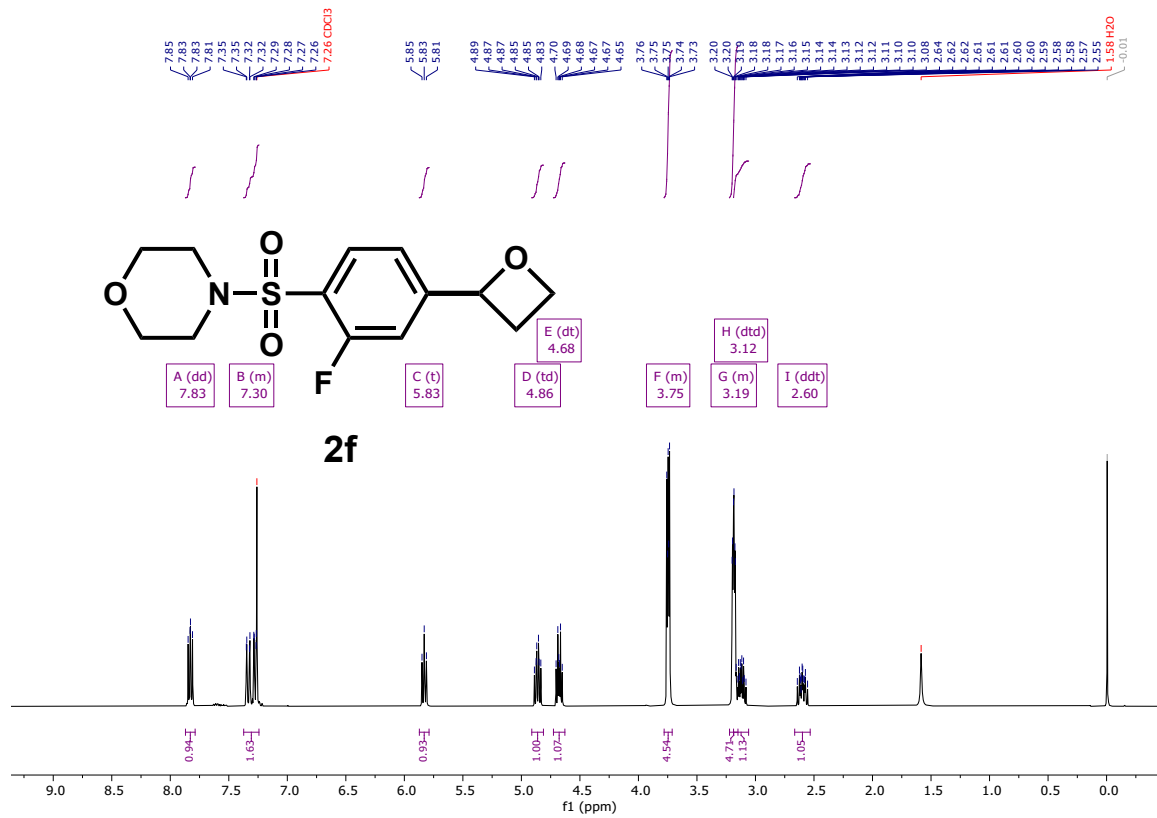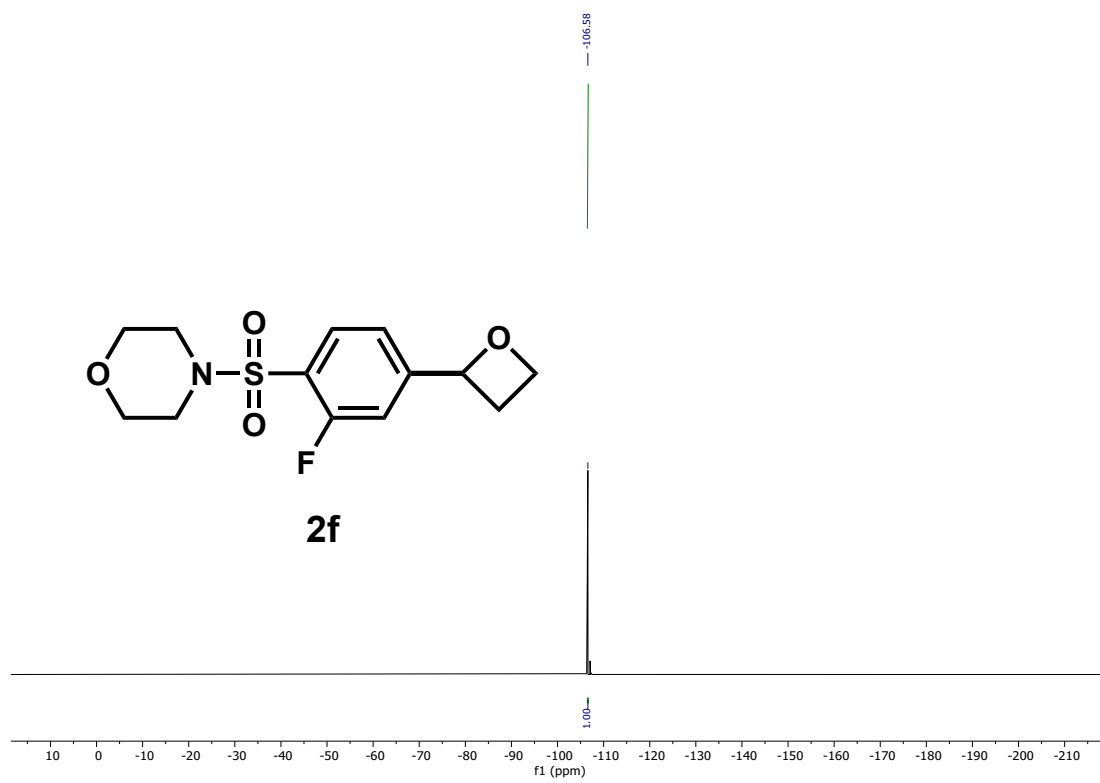

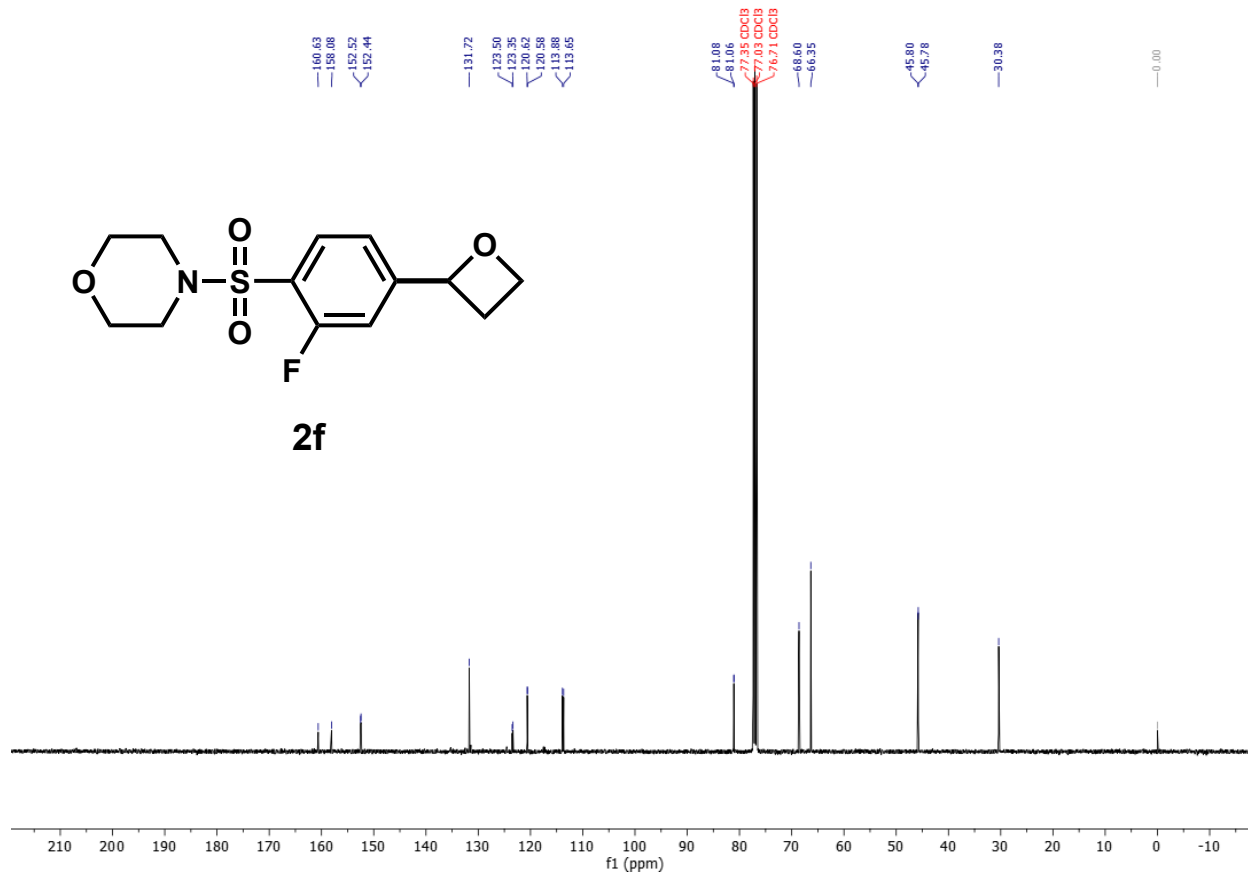

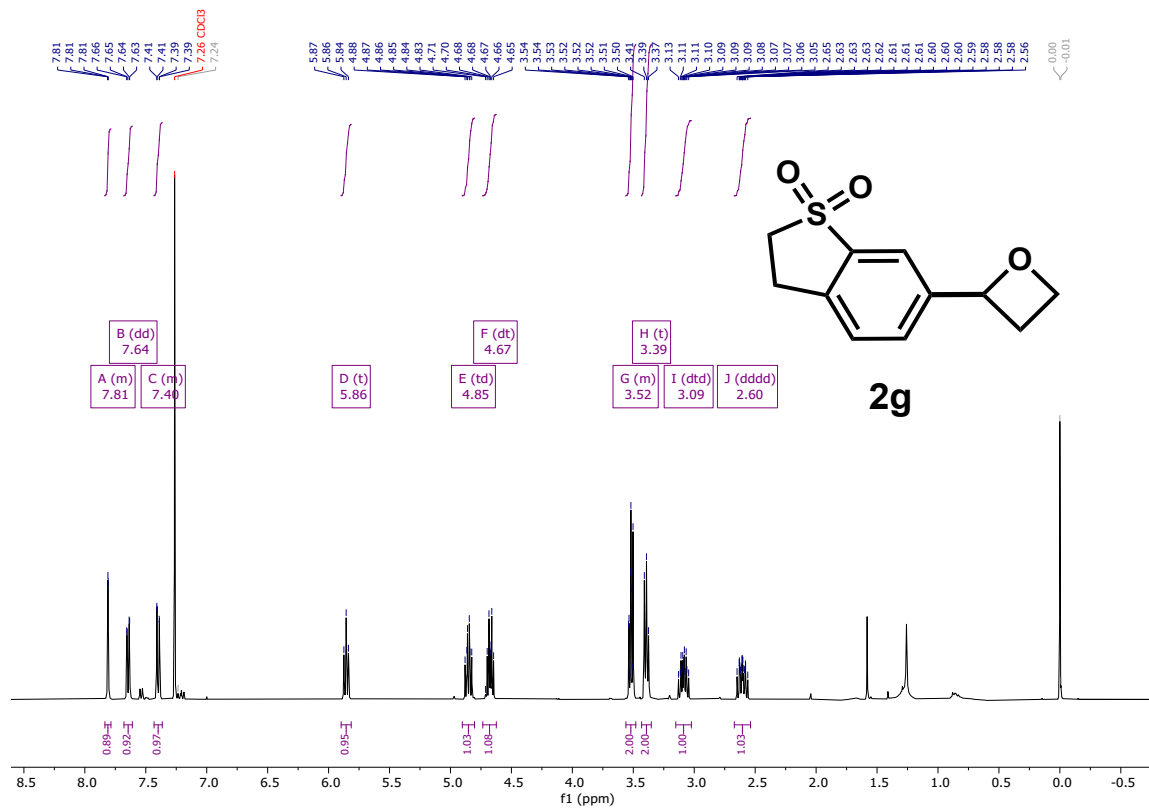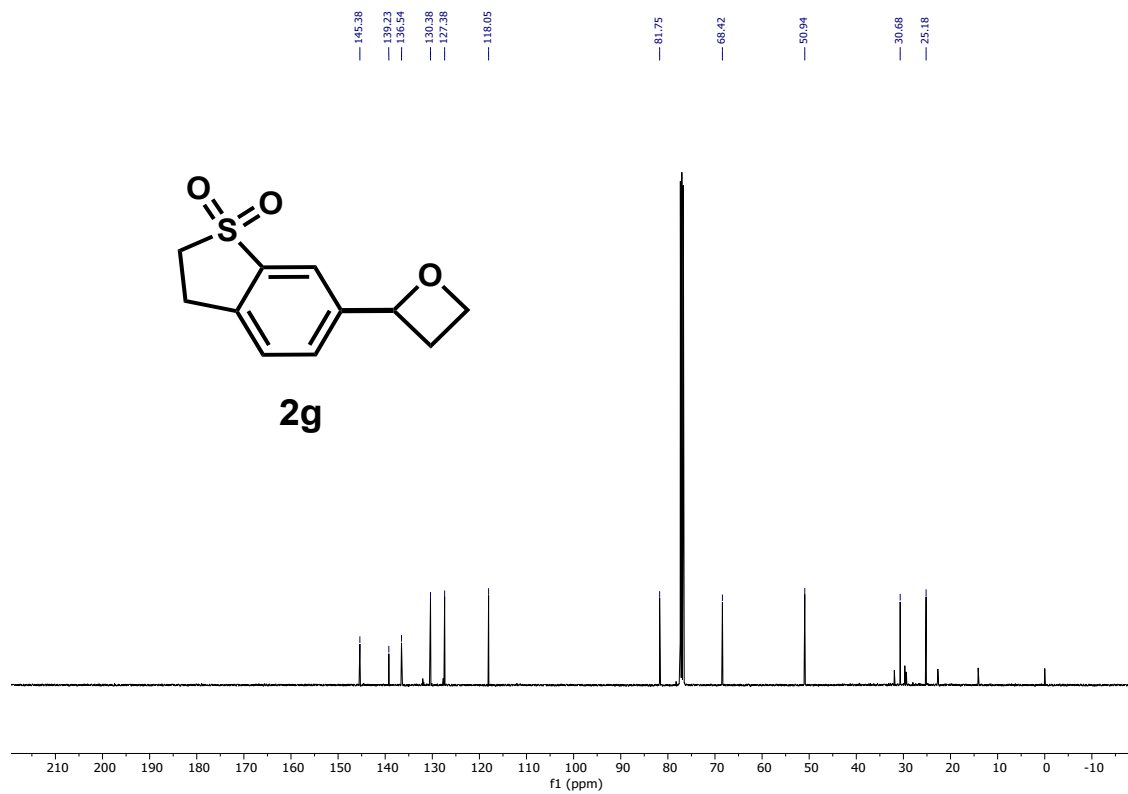

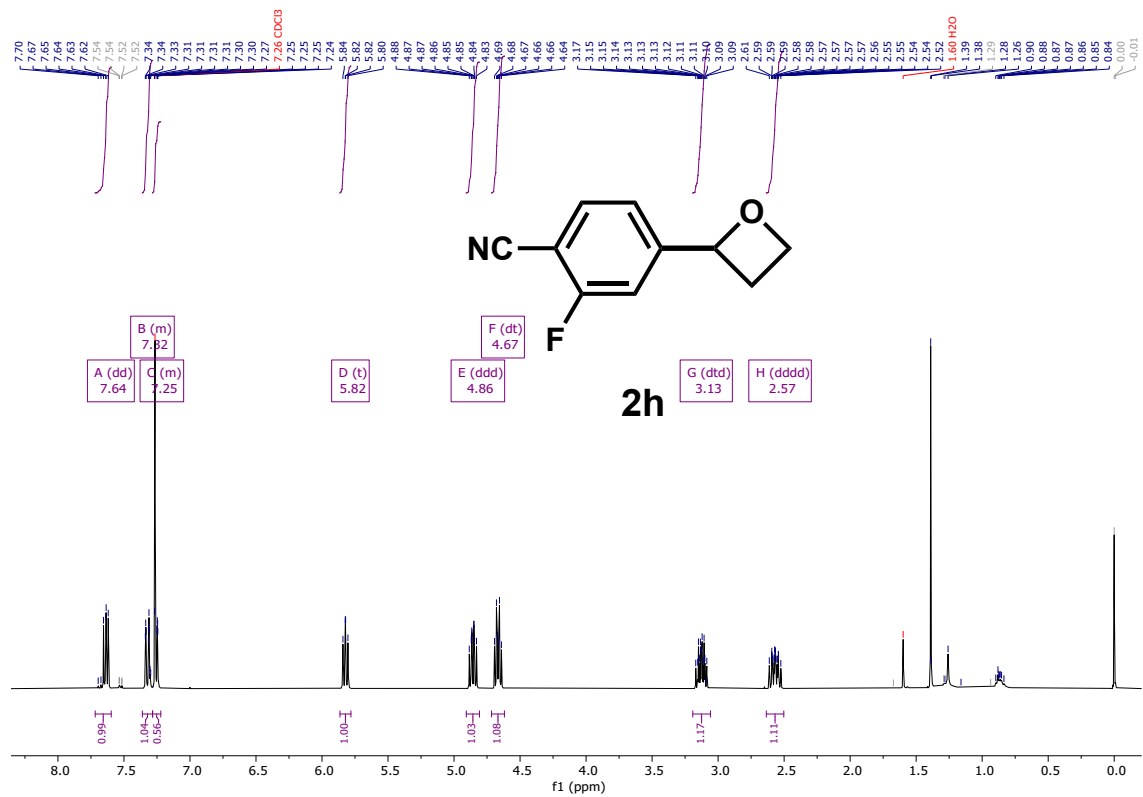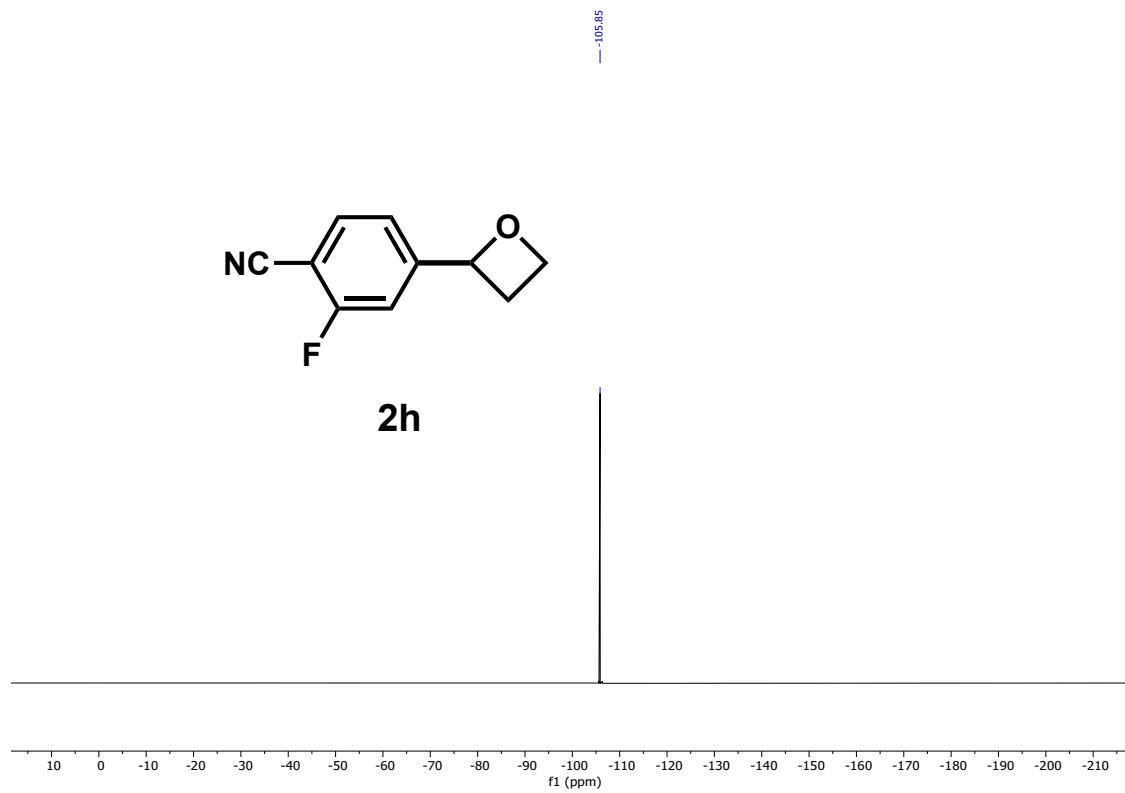

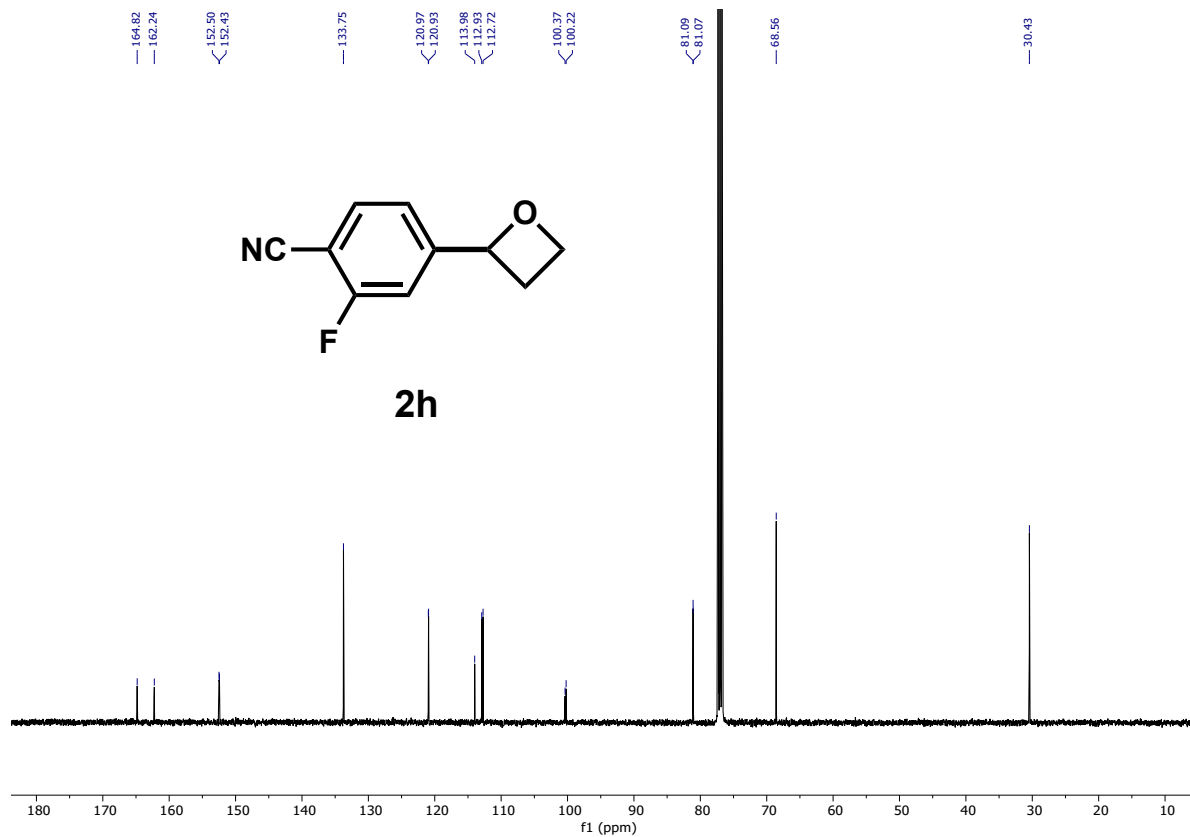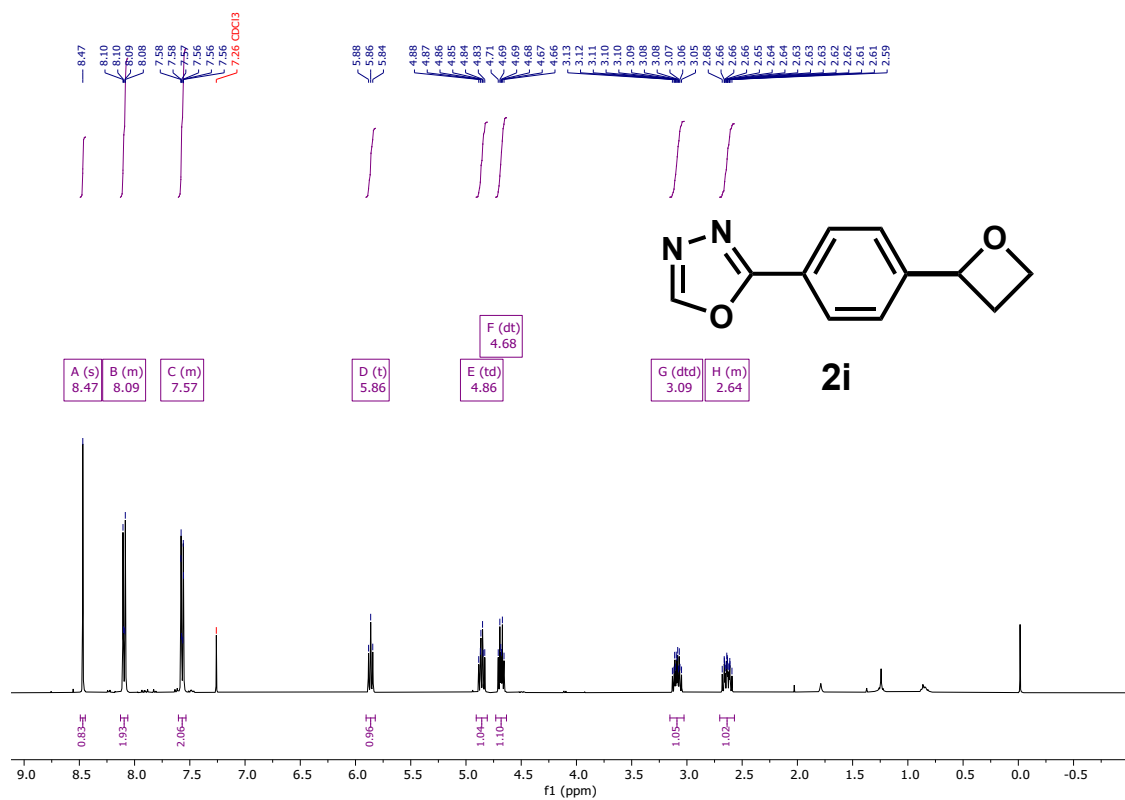

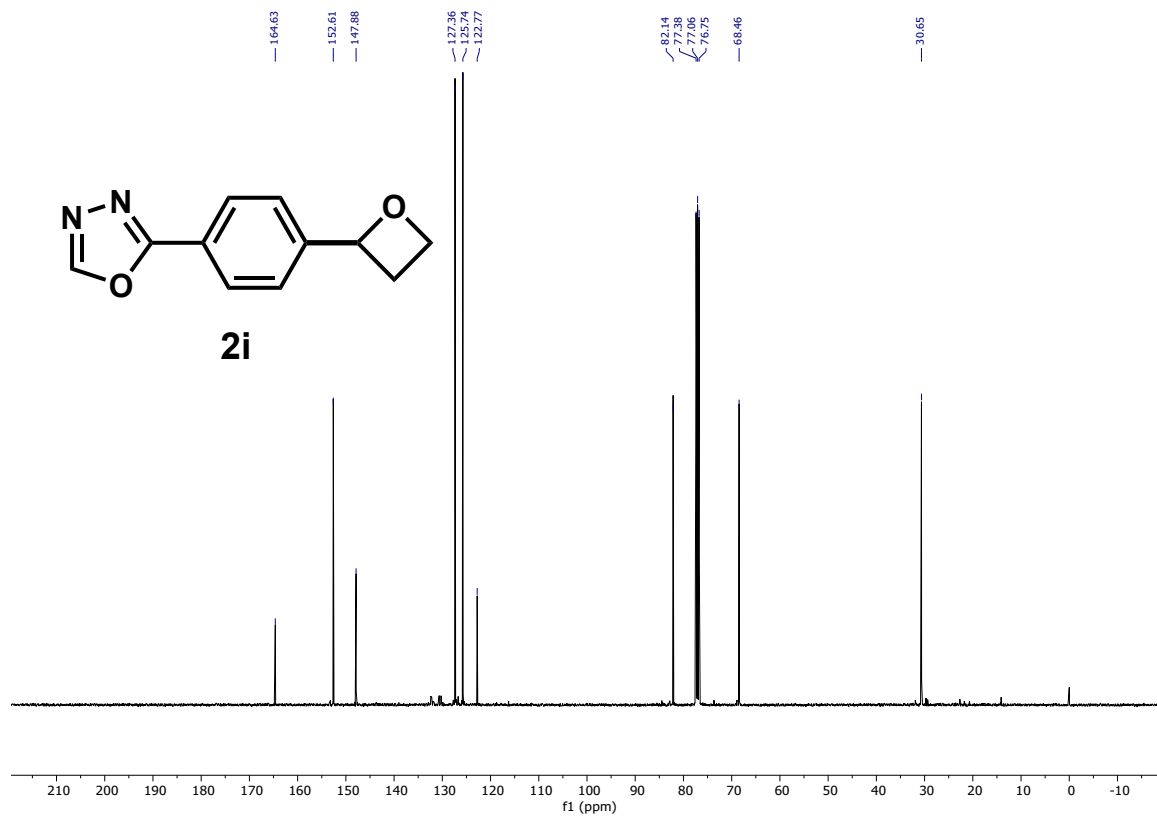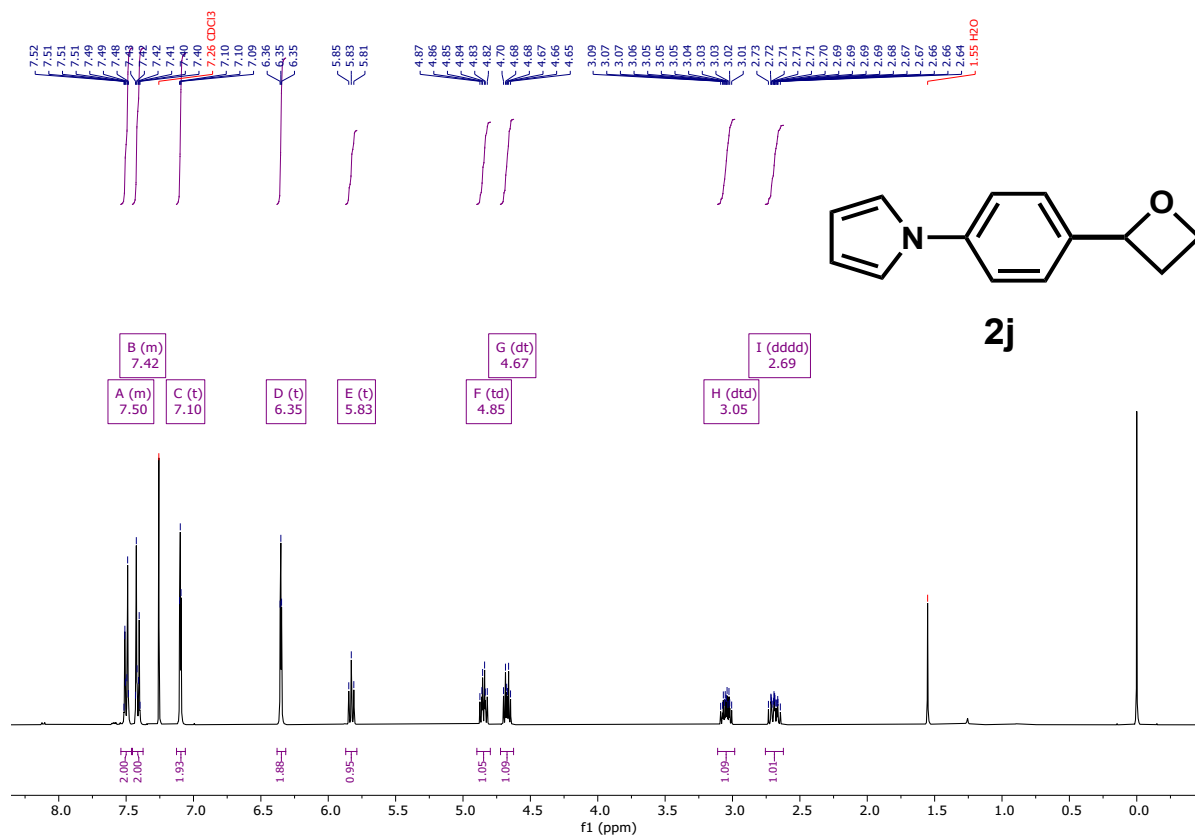

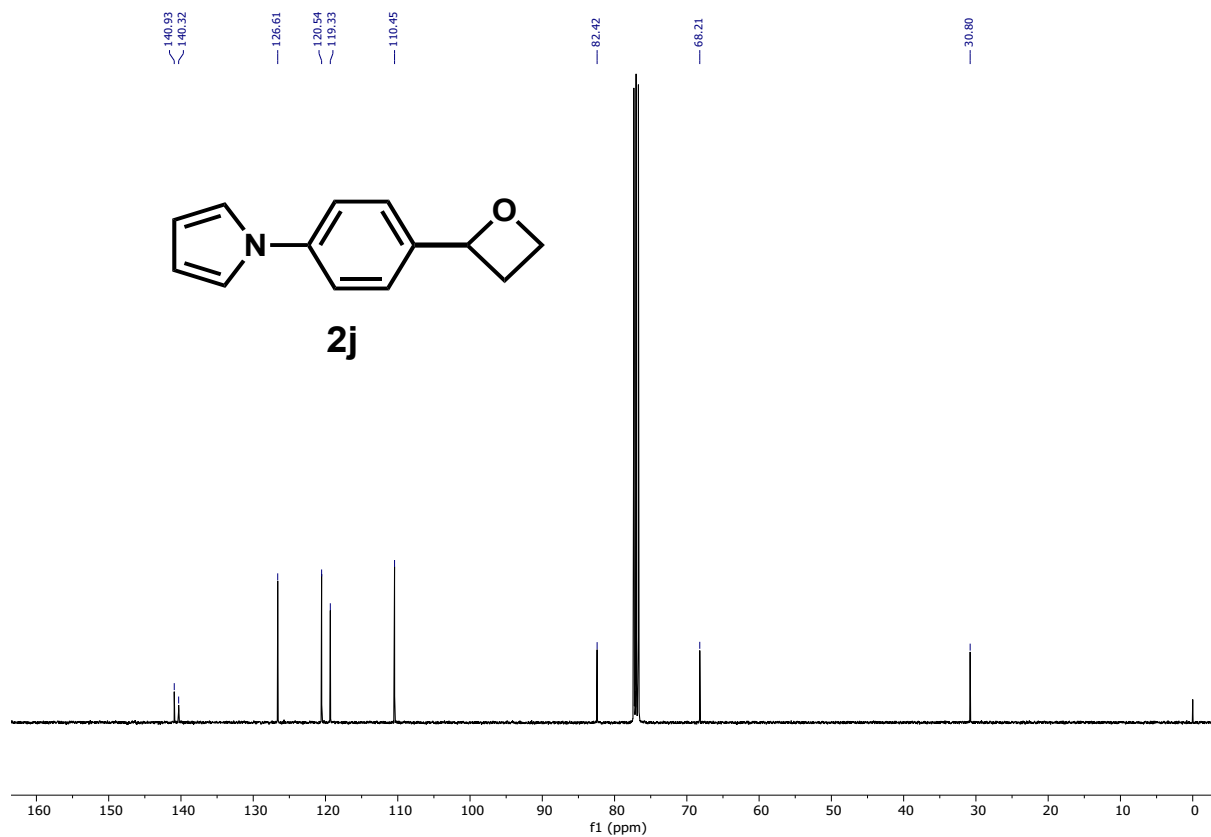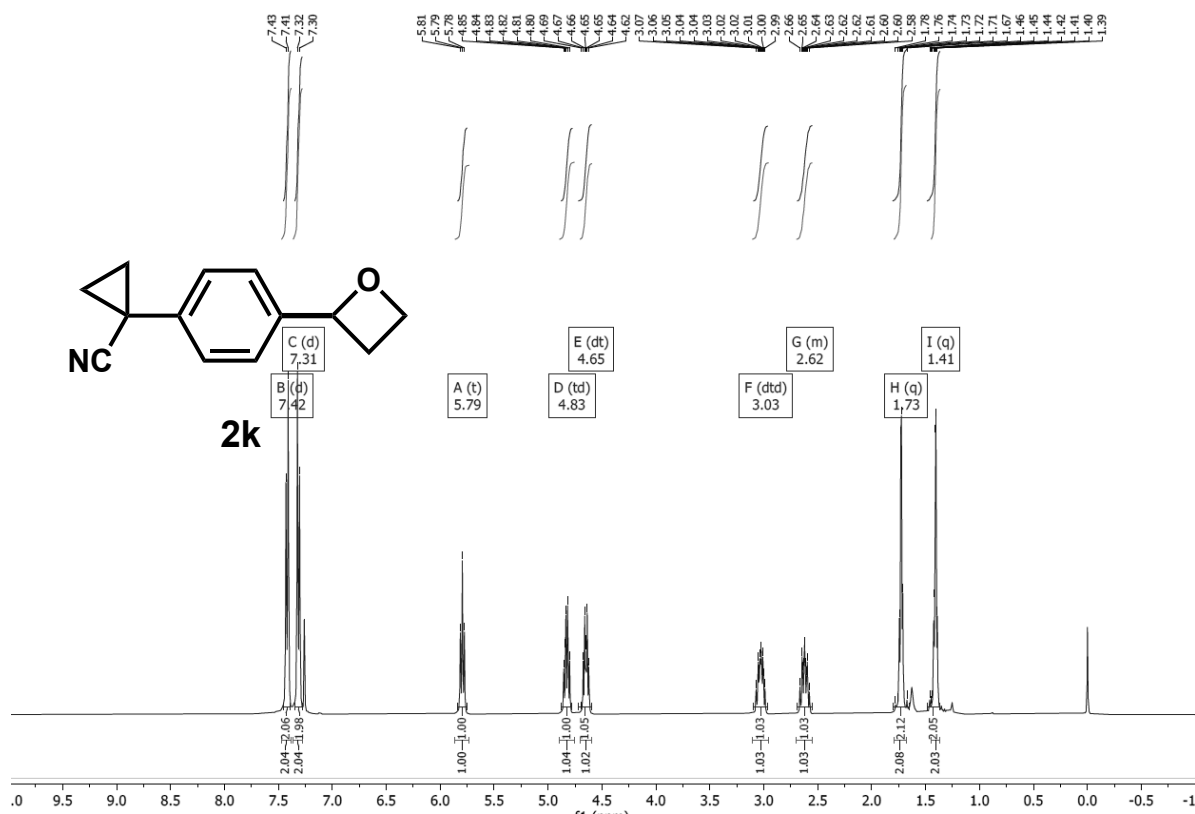

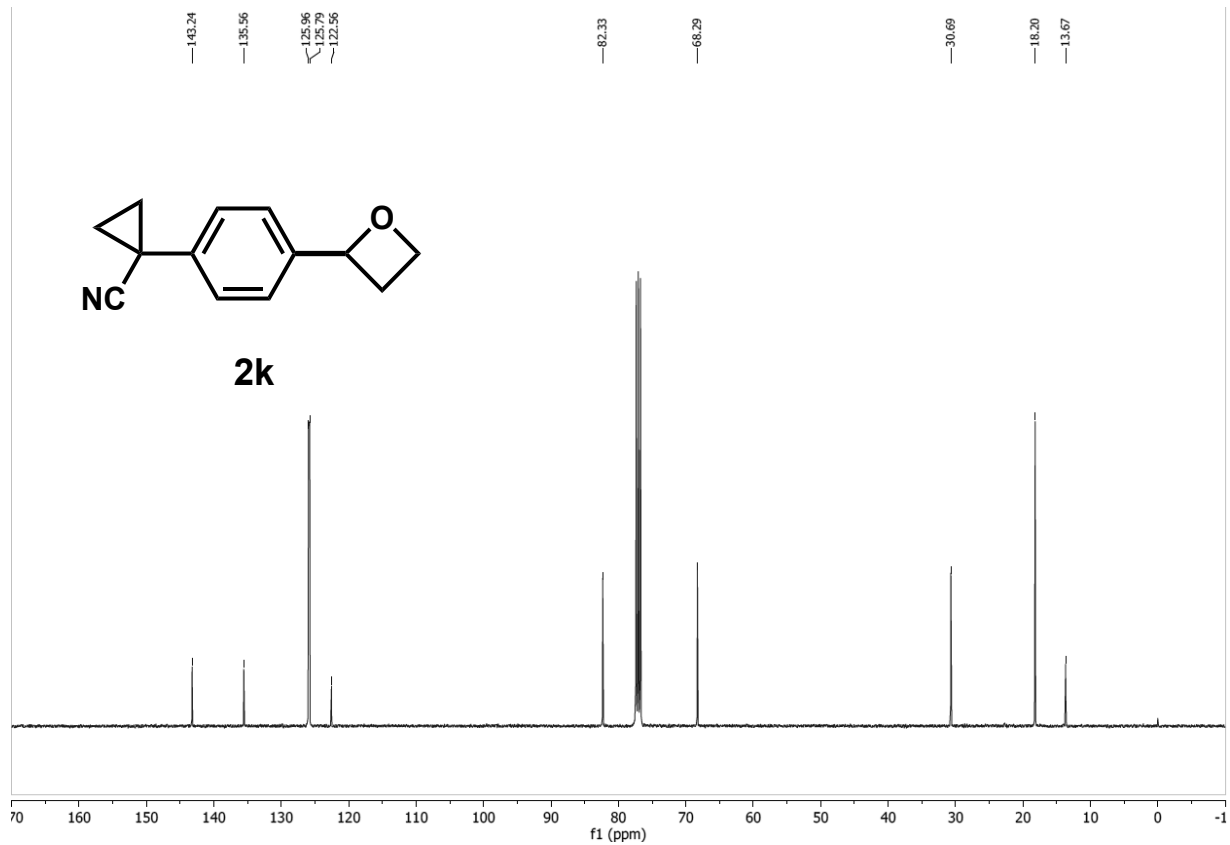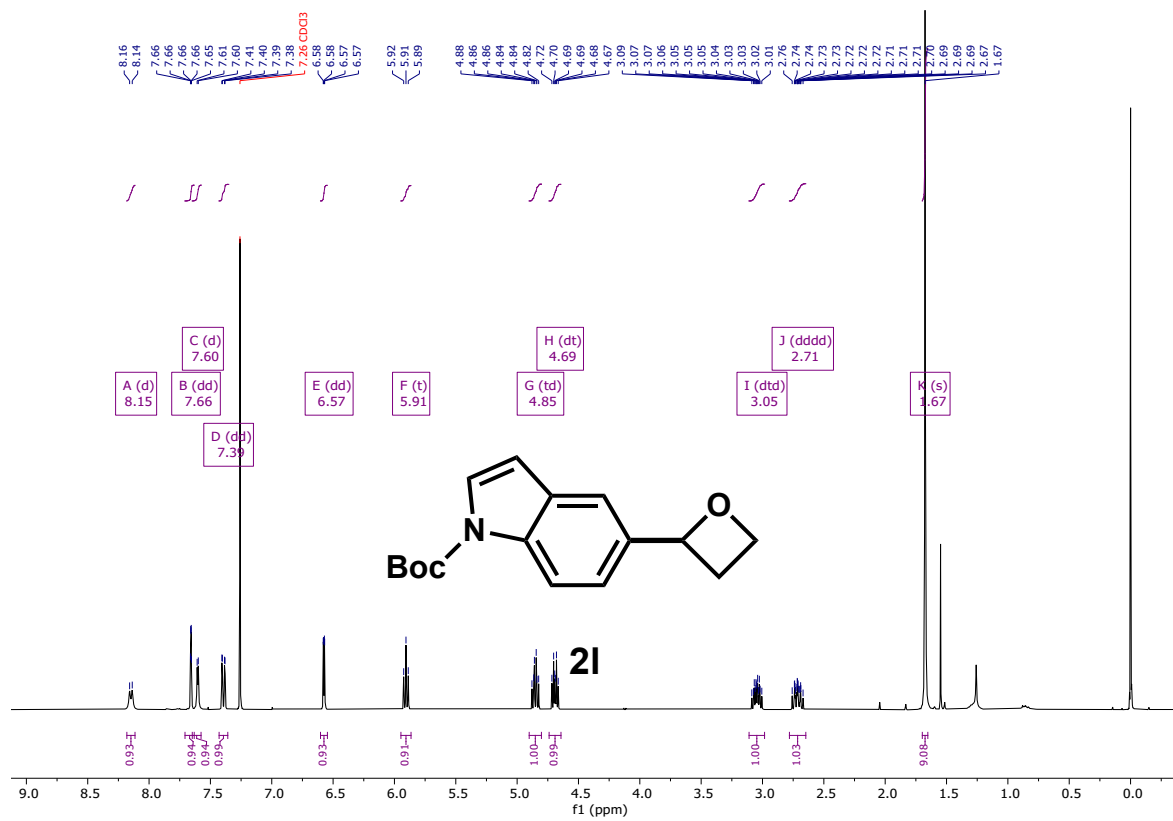



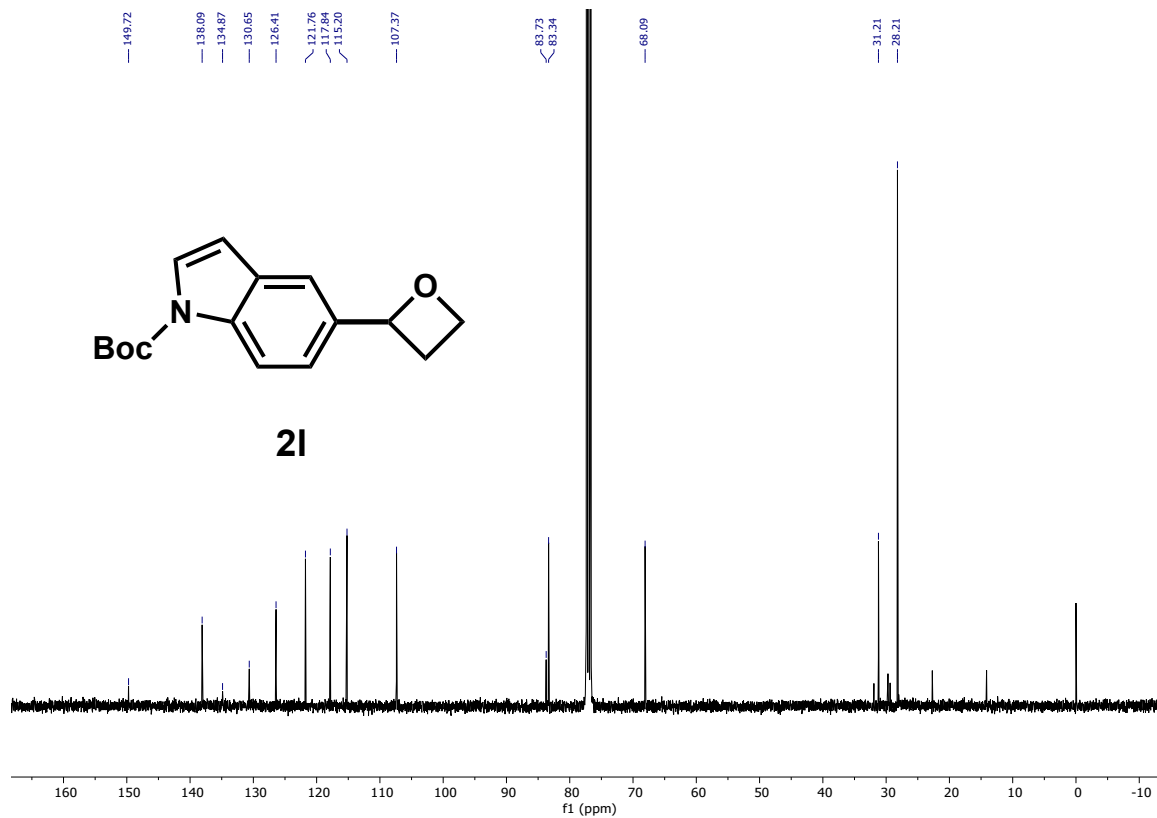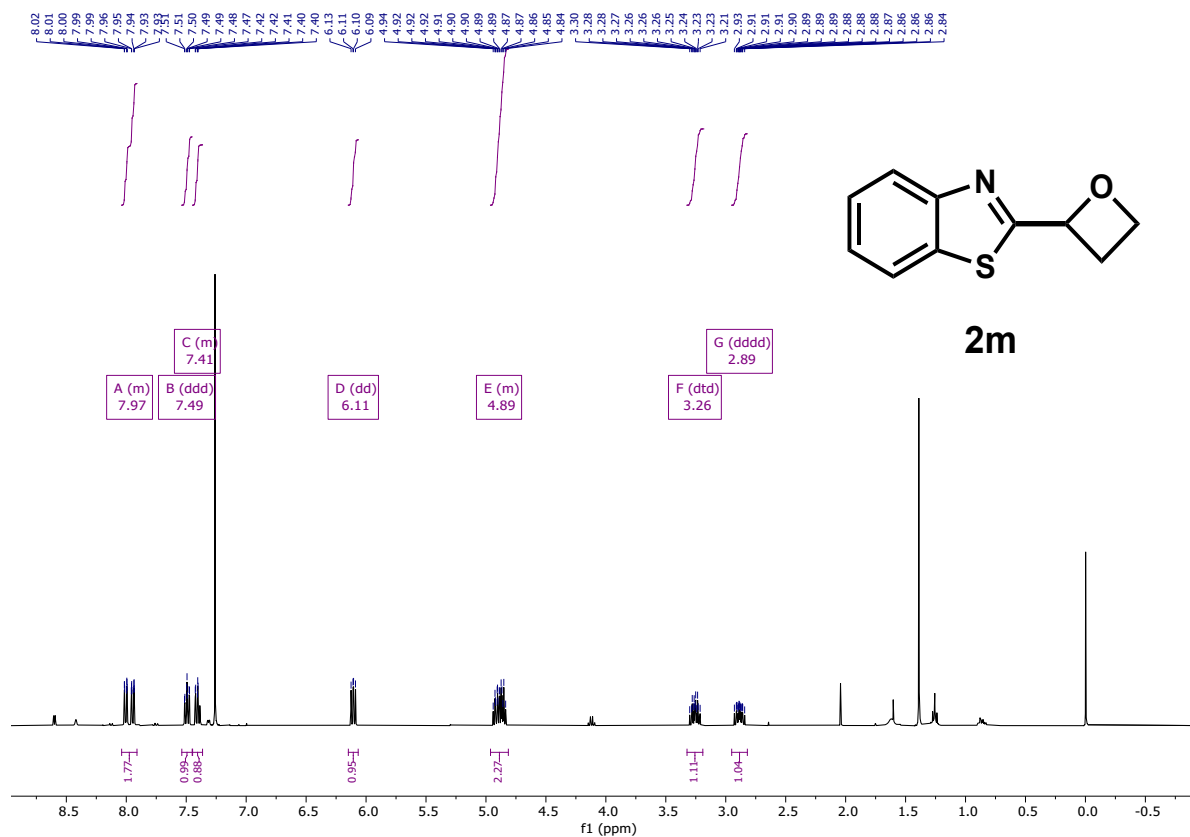

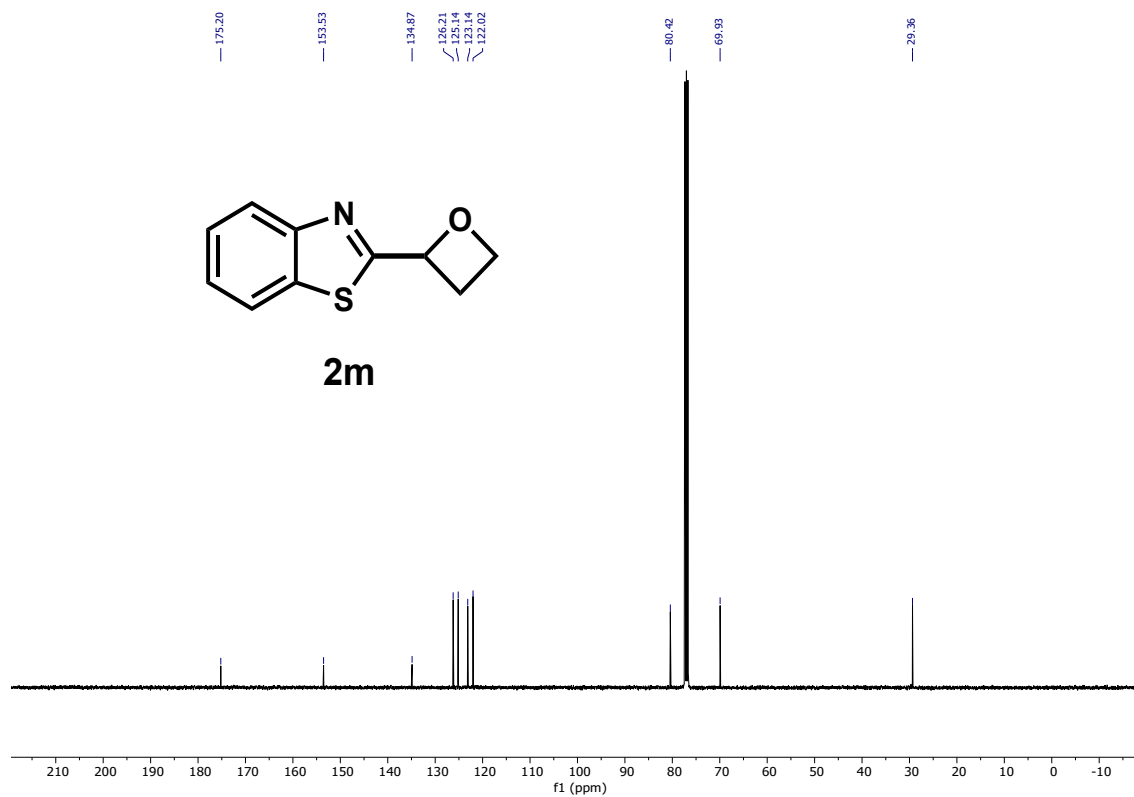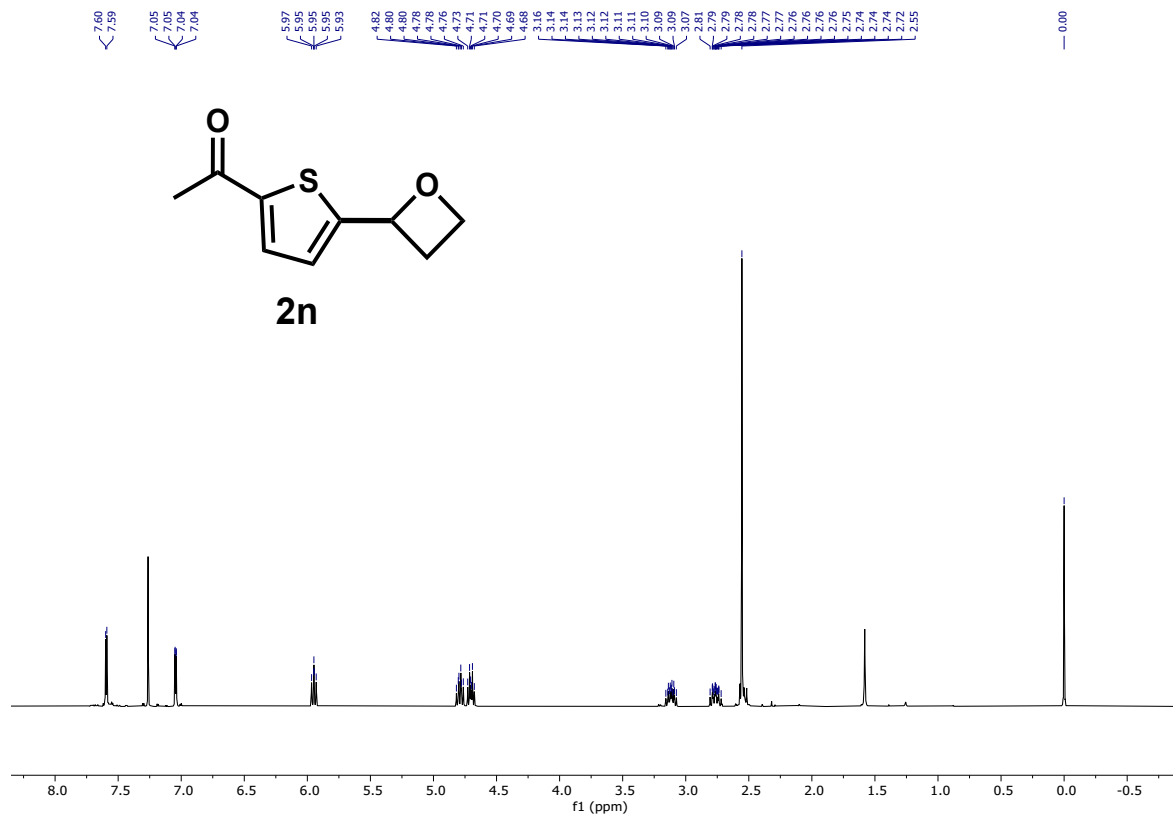

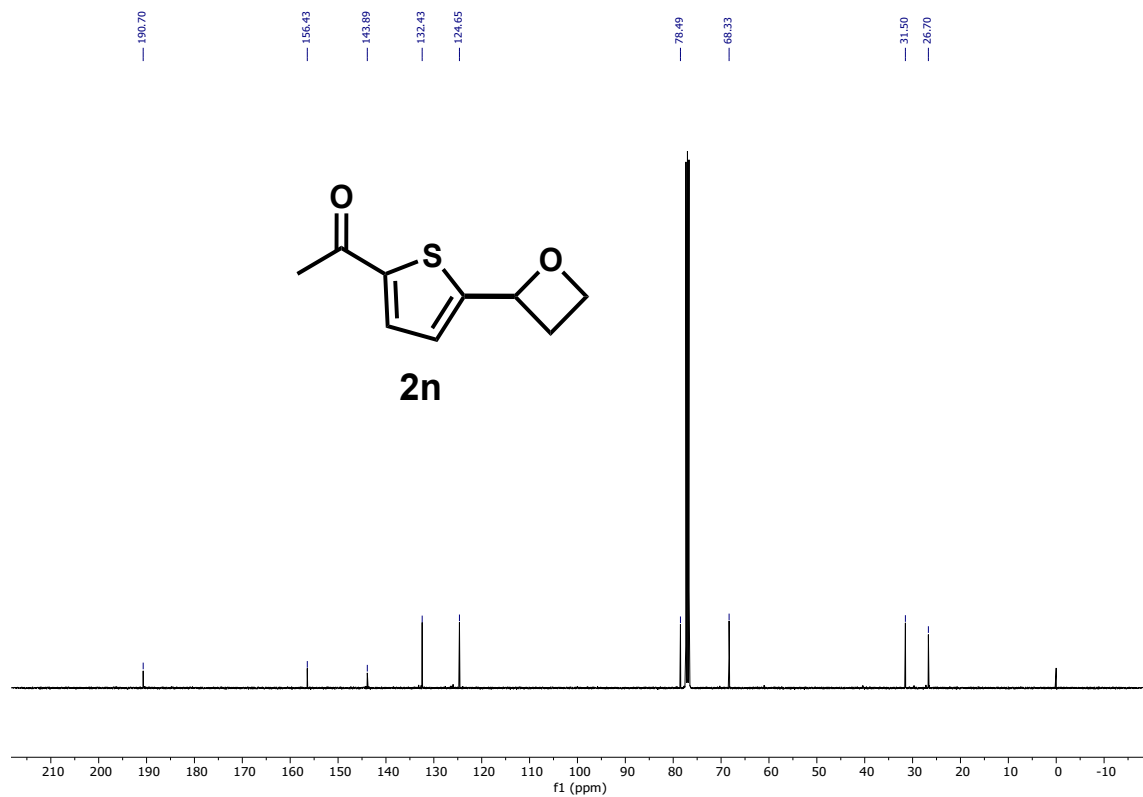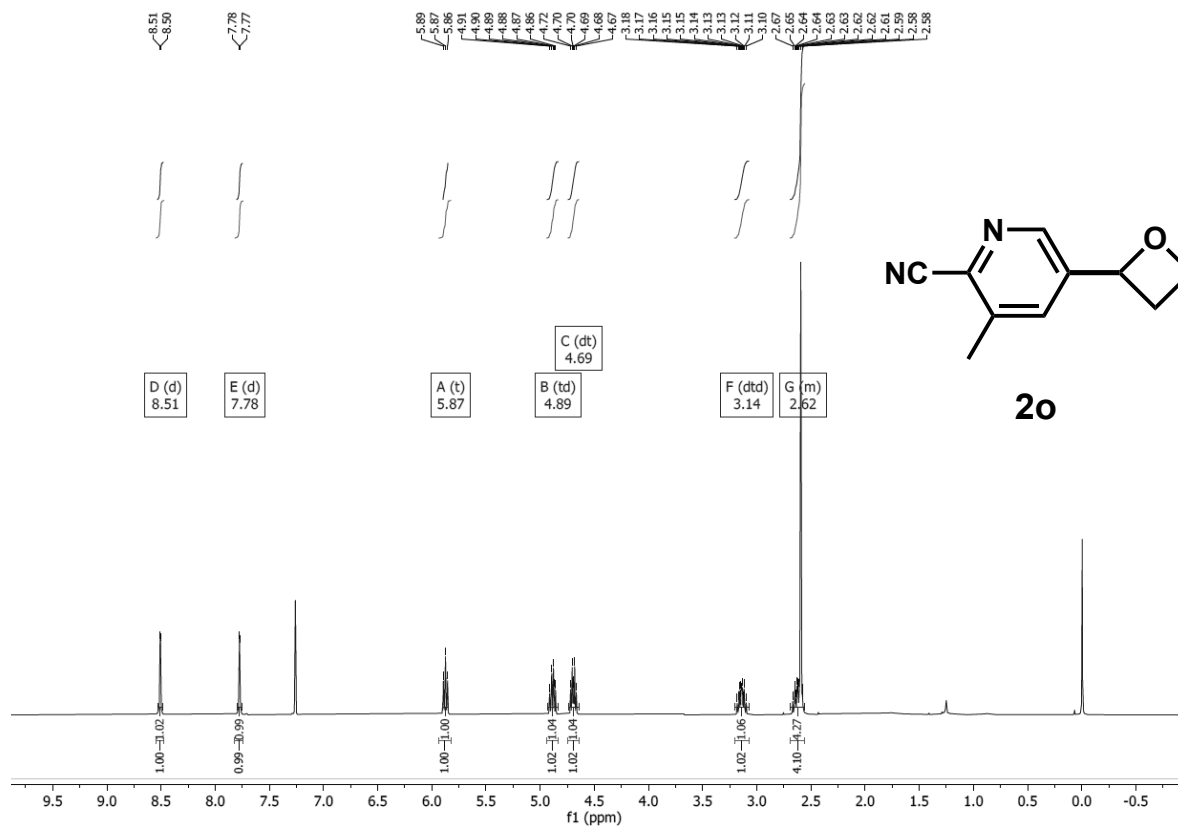

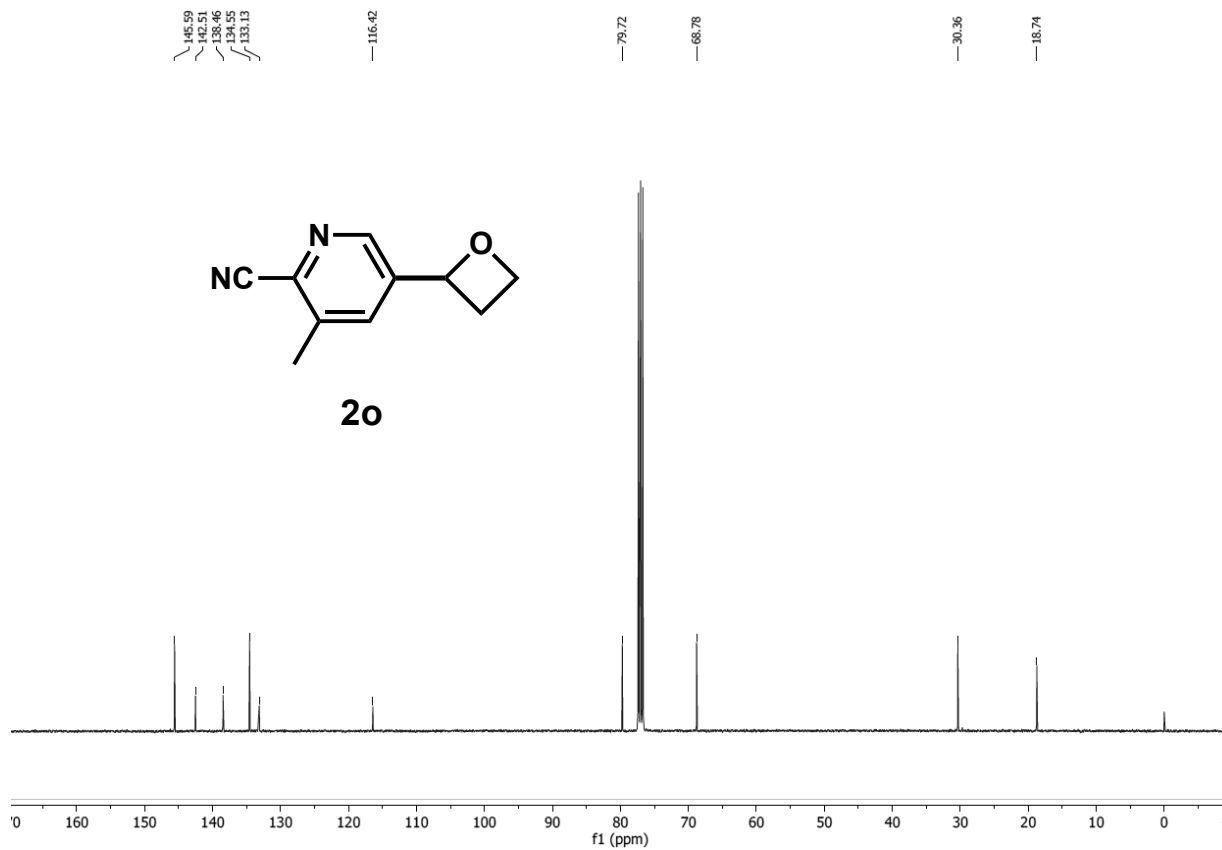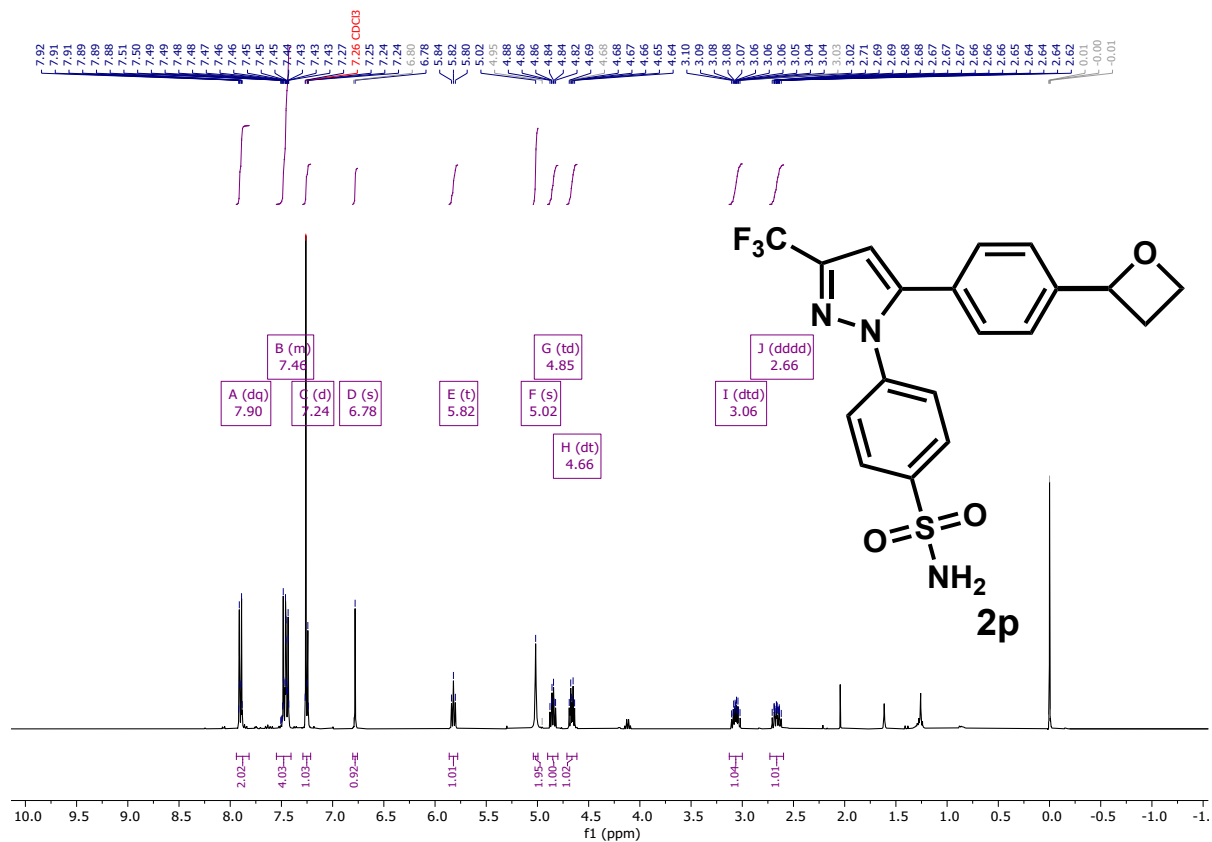

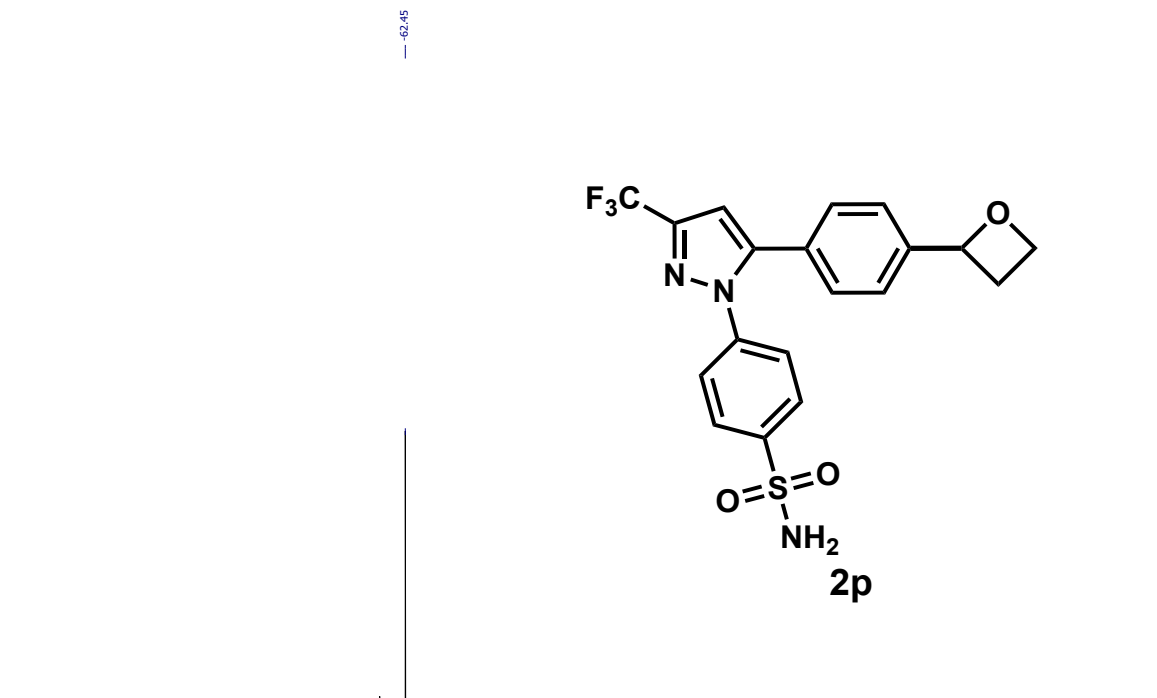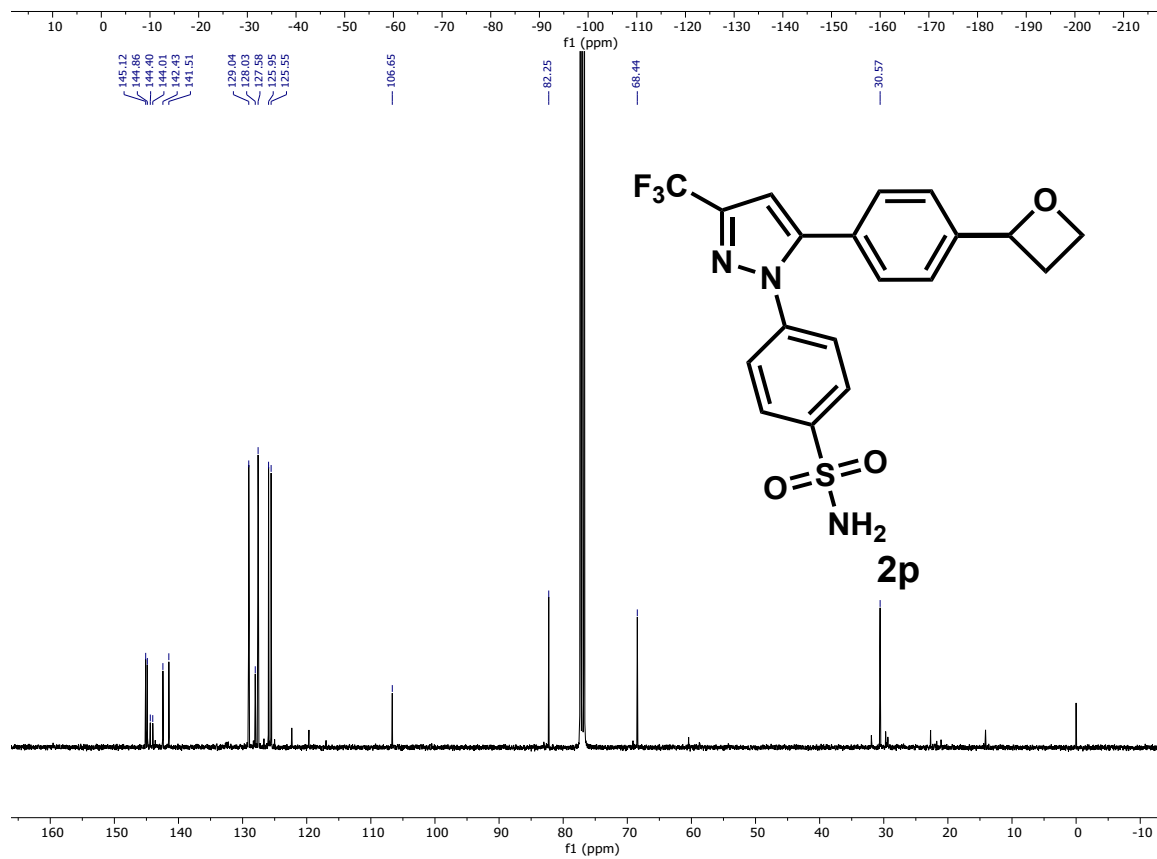

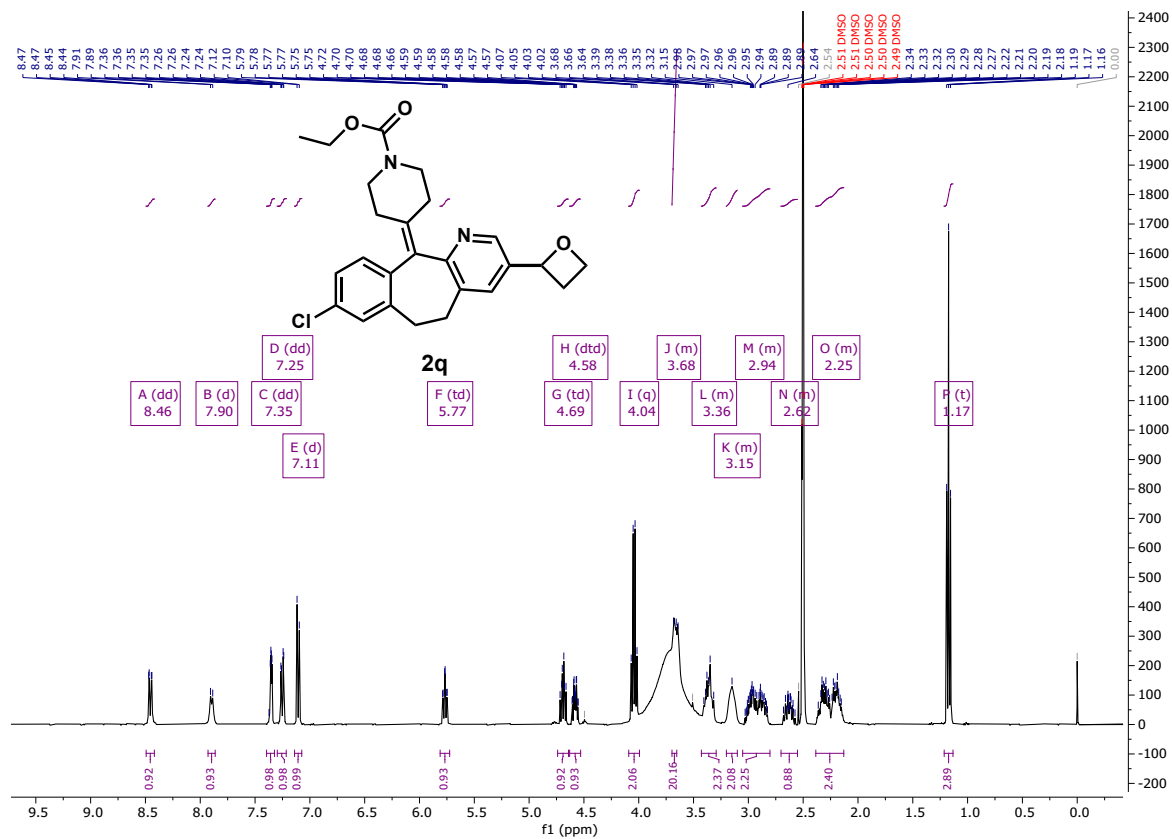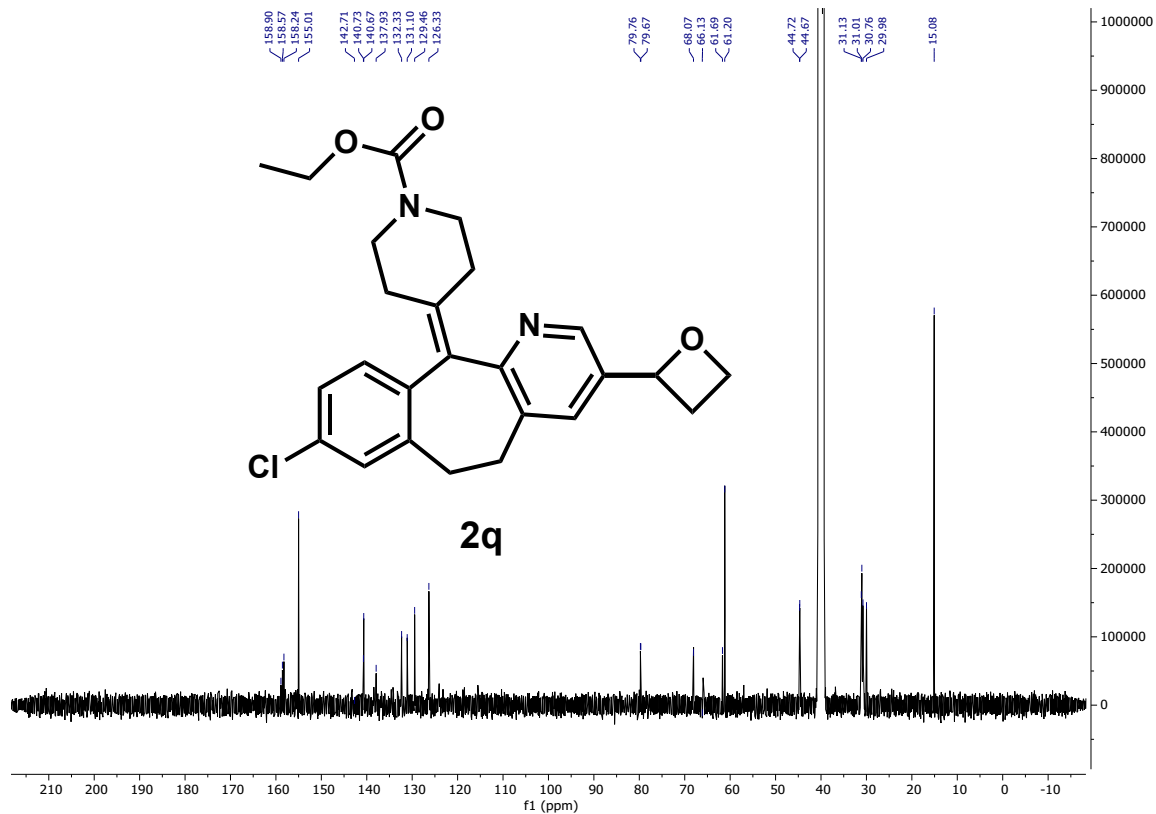

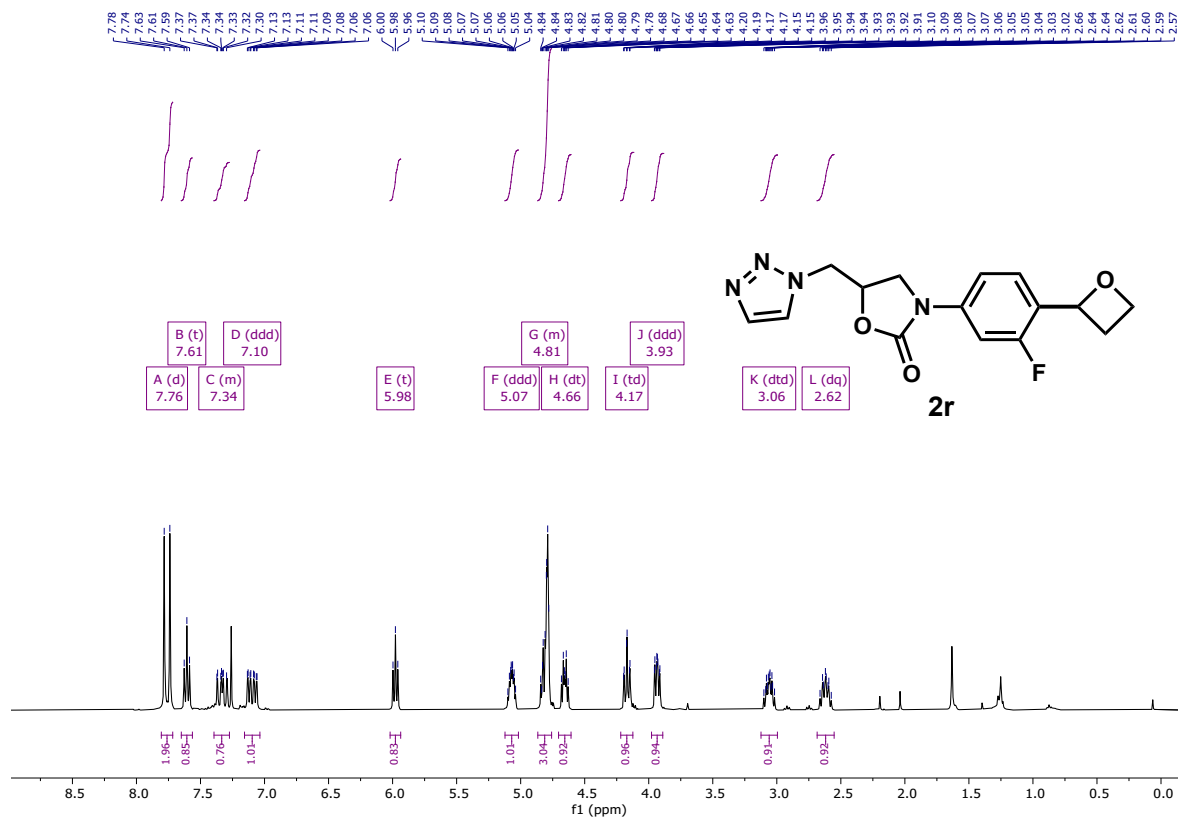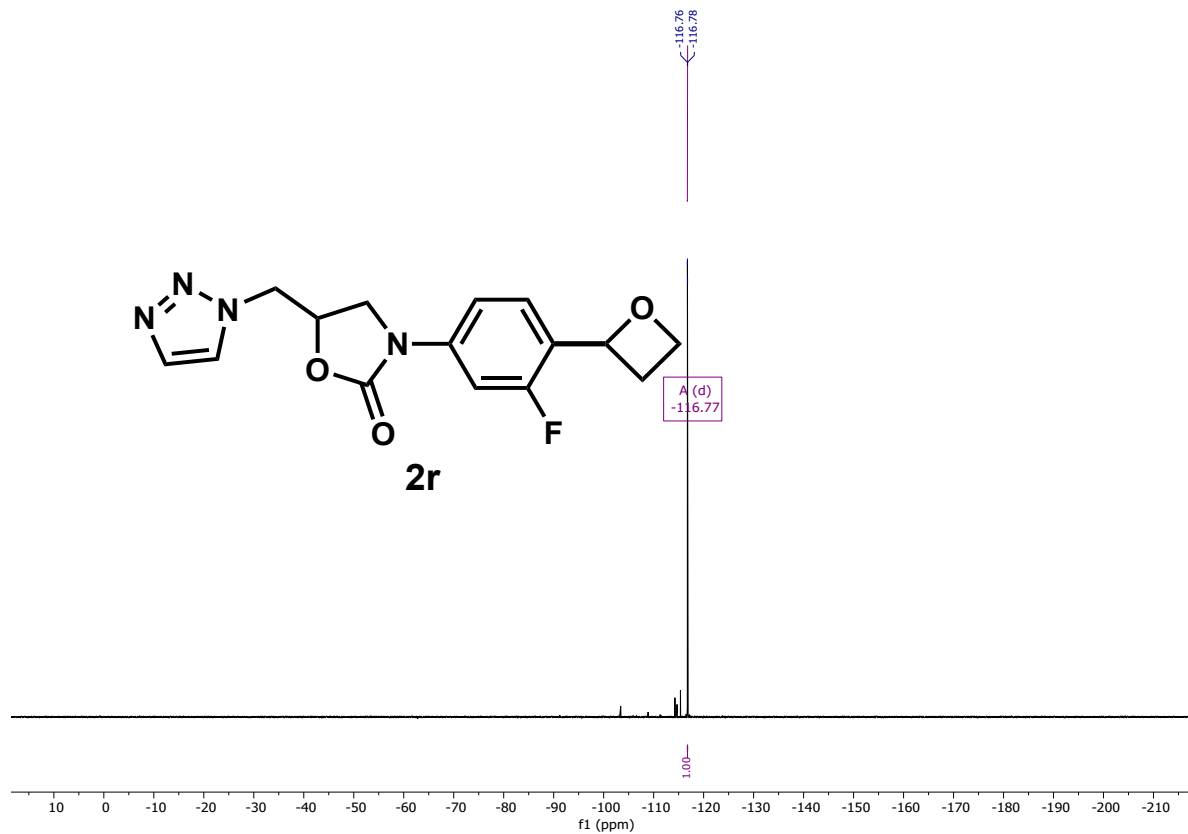

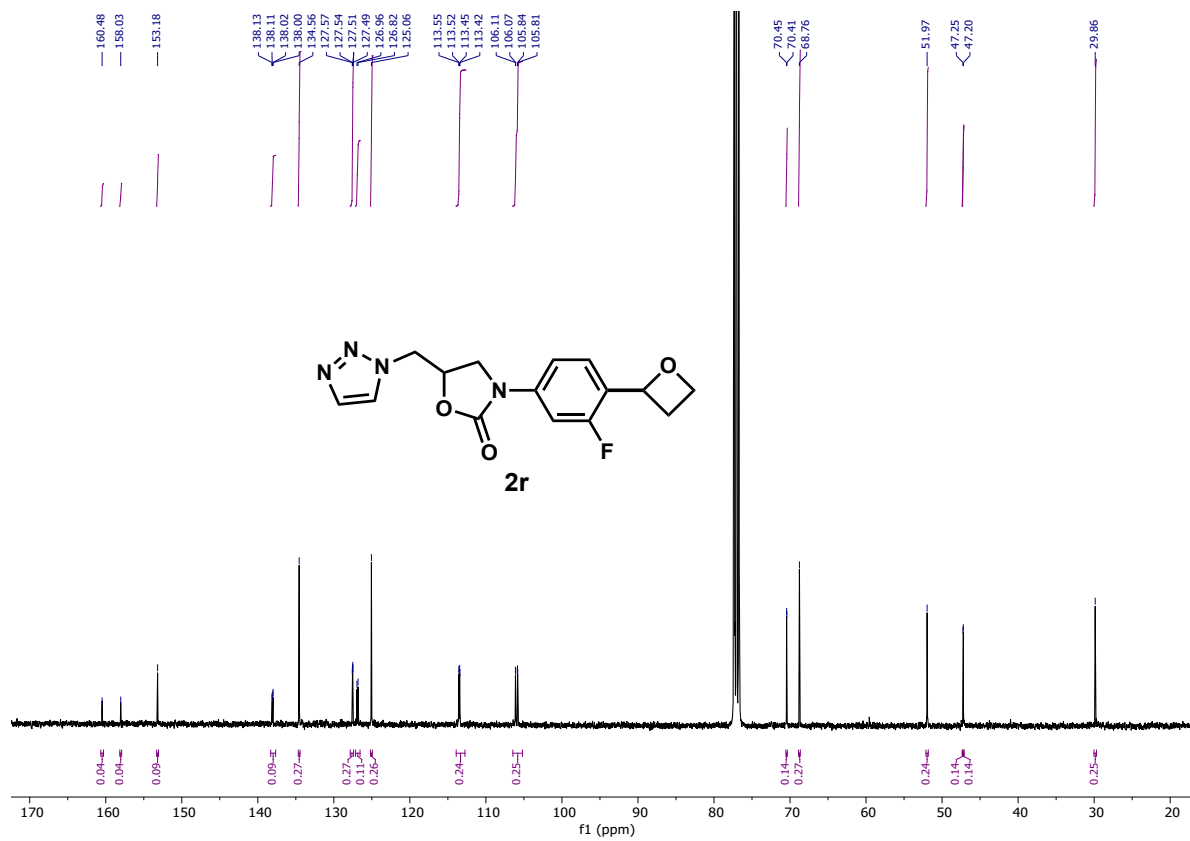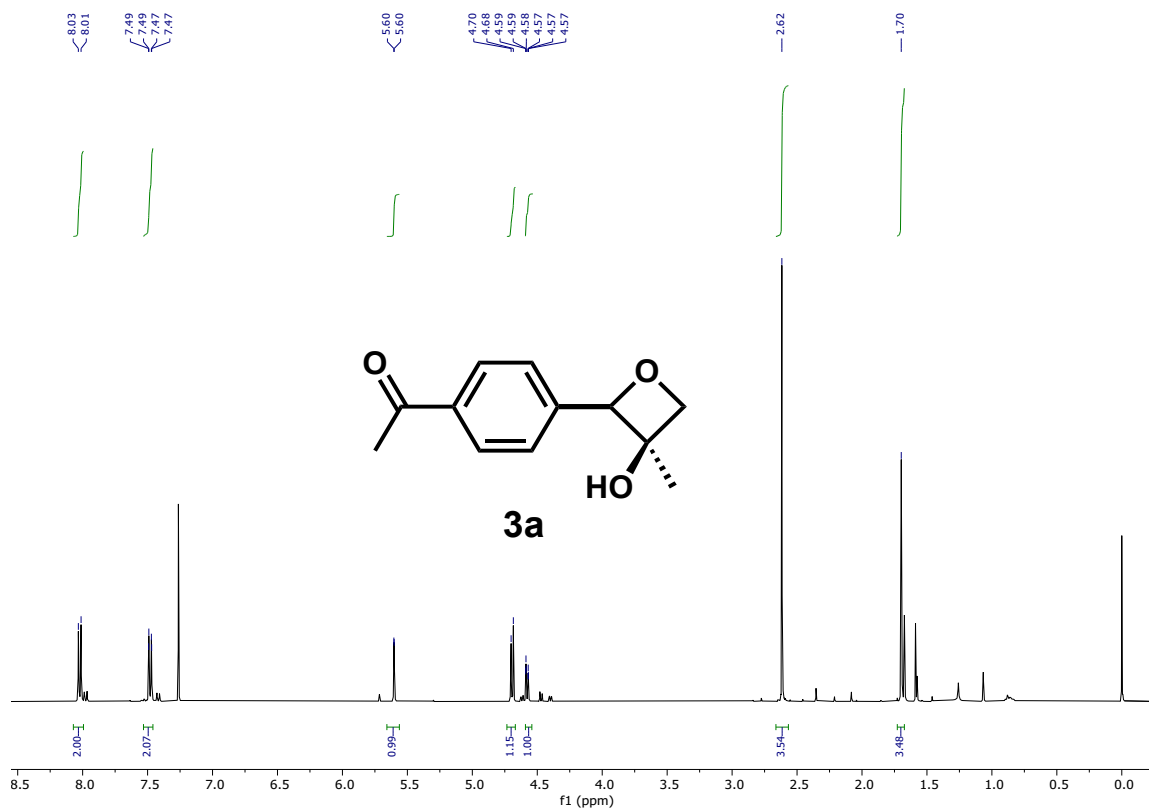

The minor diastereomer was not fully separable by chromatography.



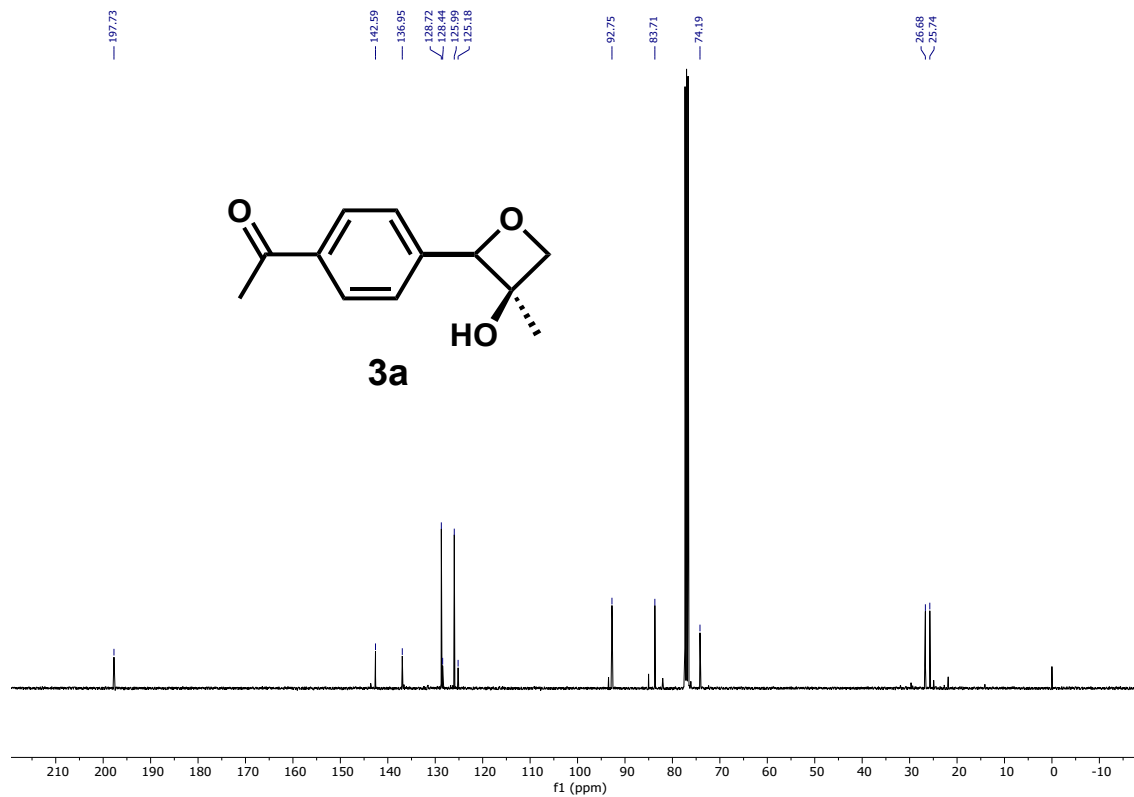

The minor diastereomer was not fully separable by chromatography.

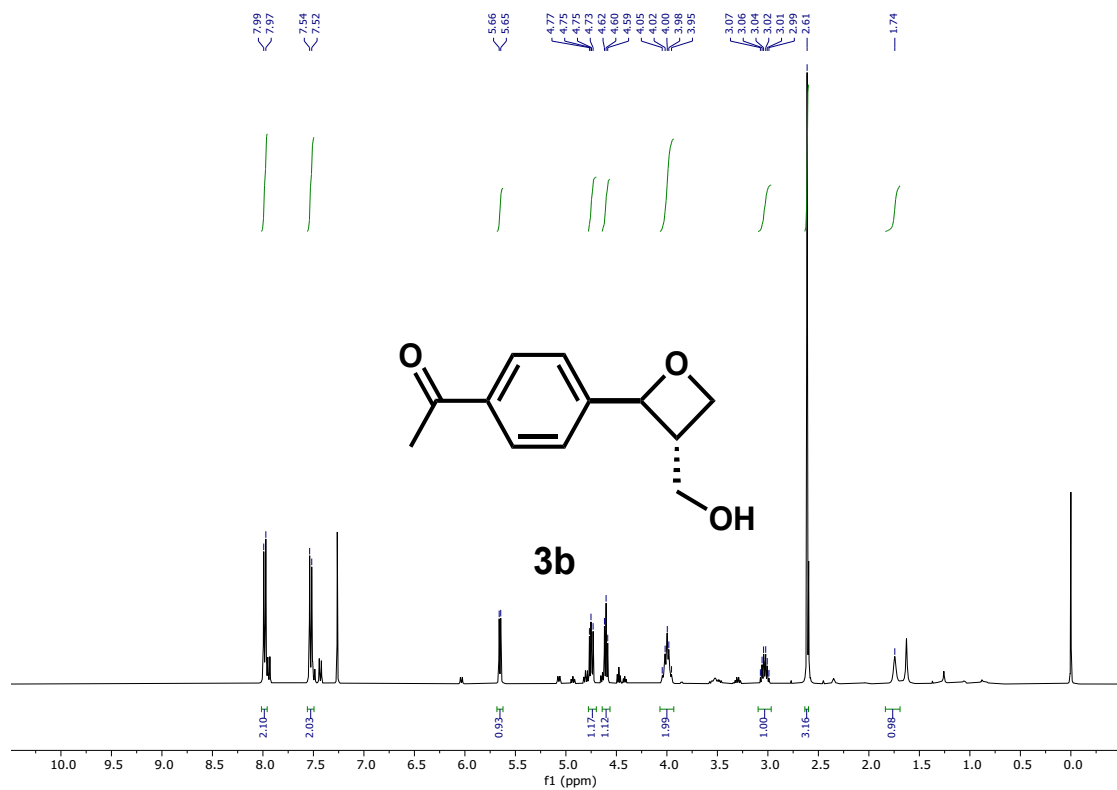

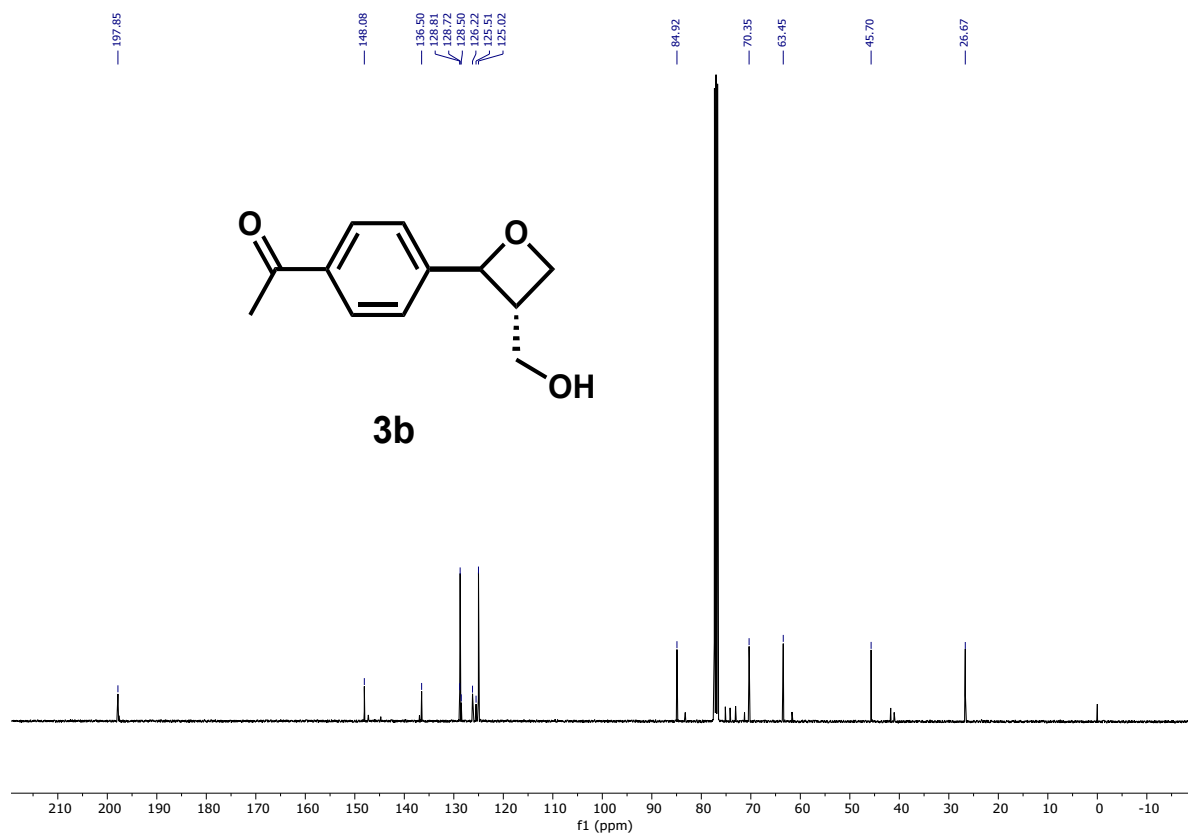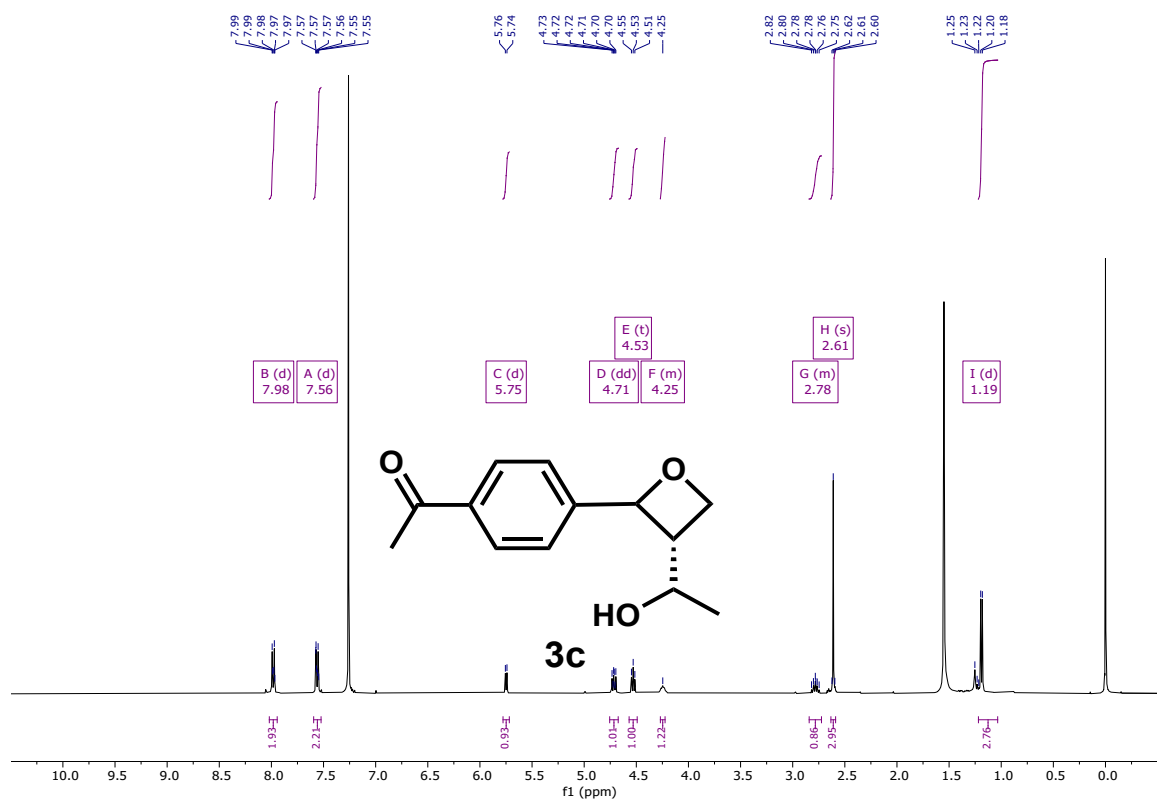

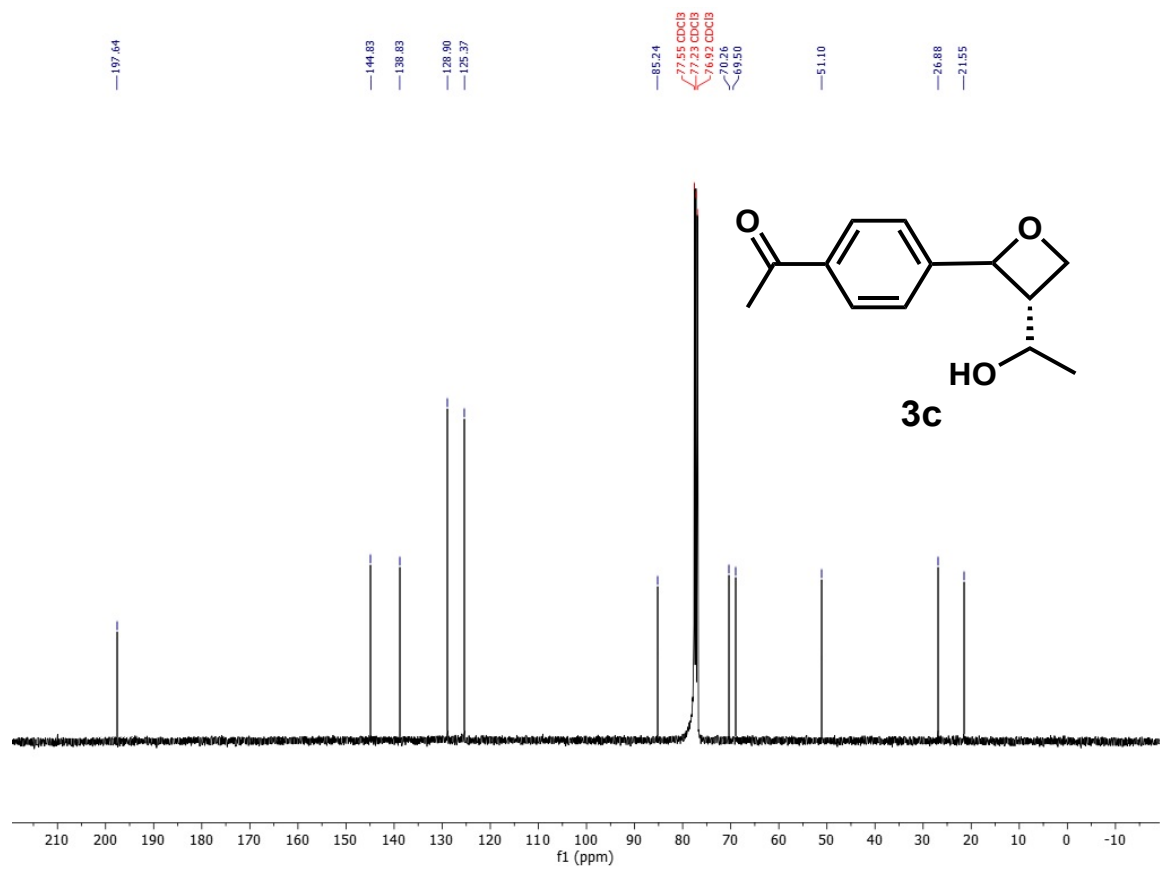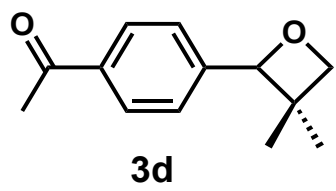

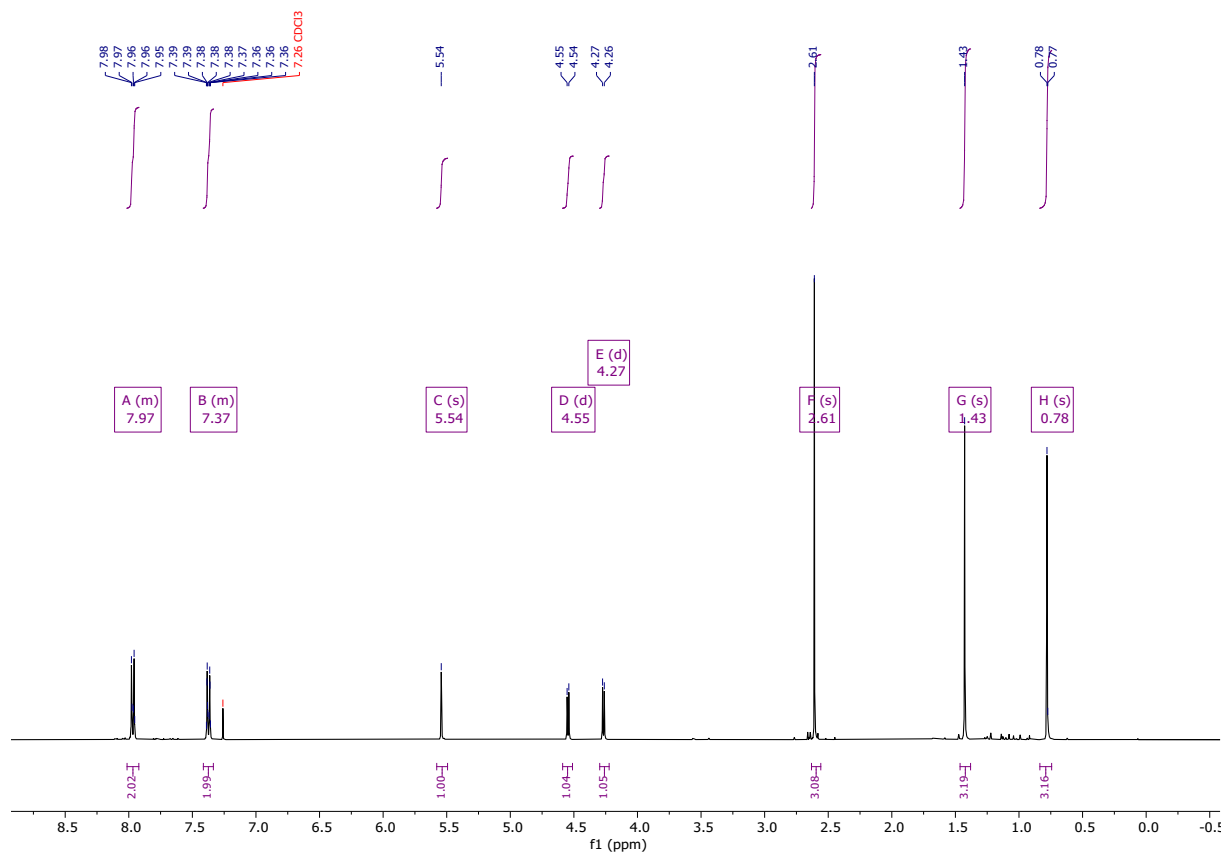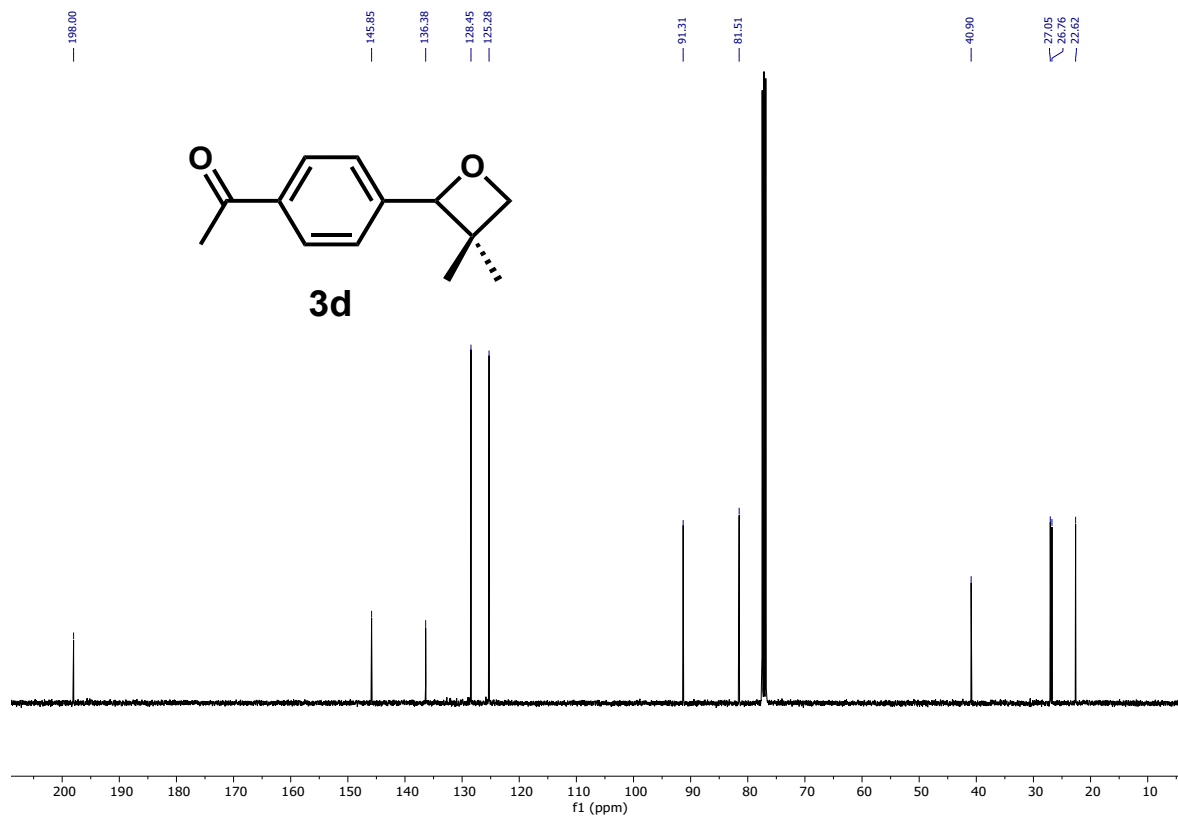

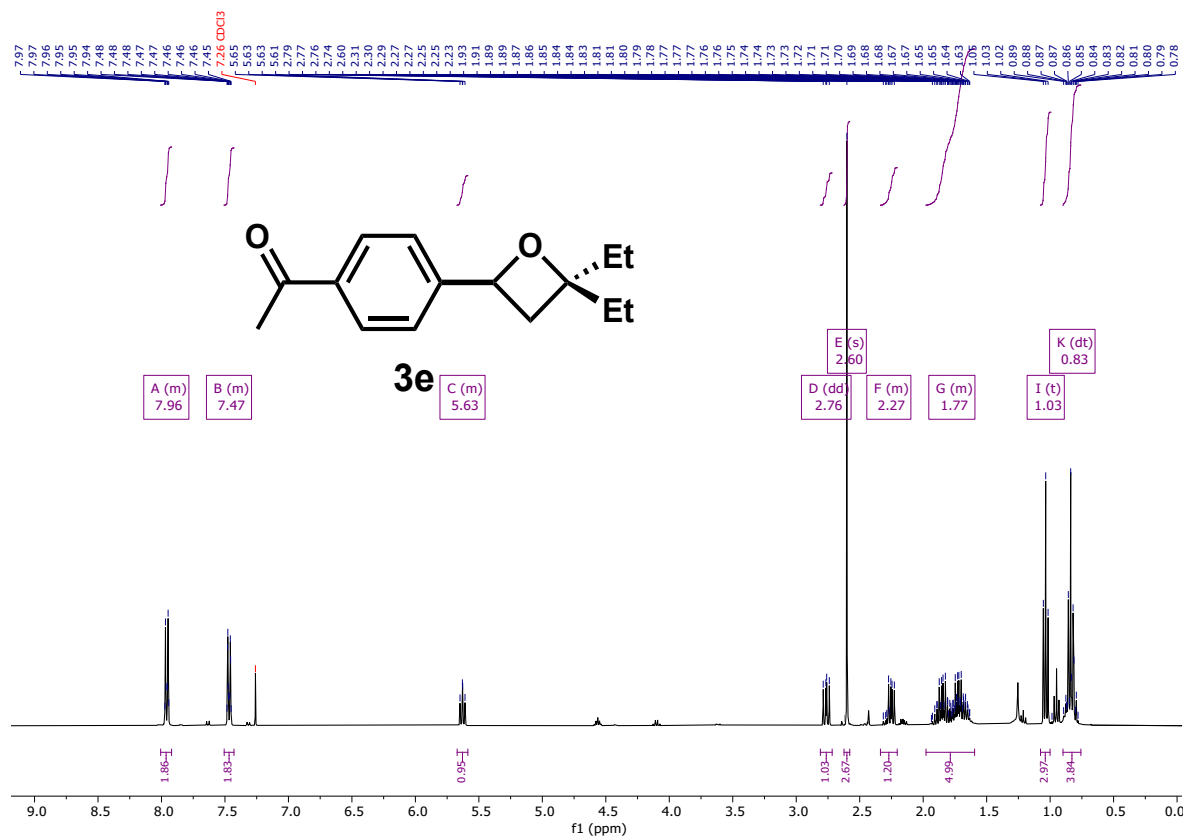

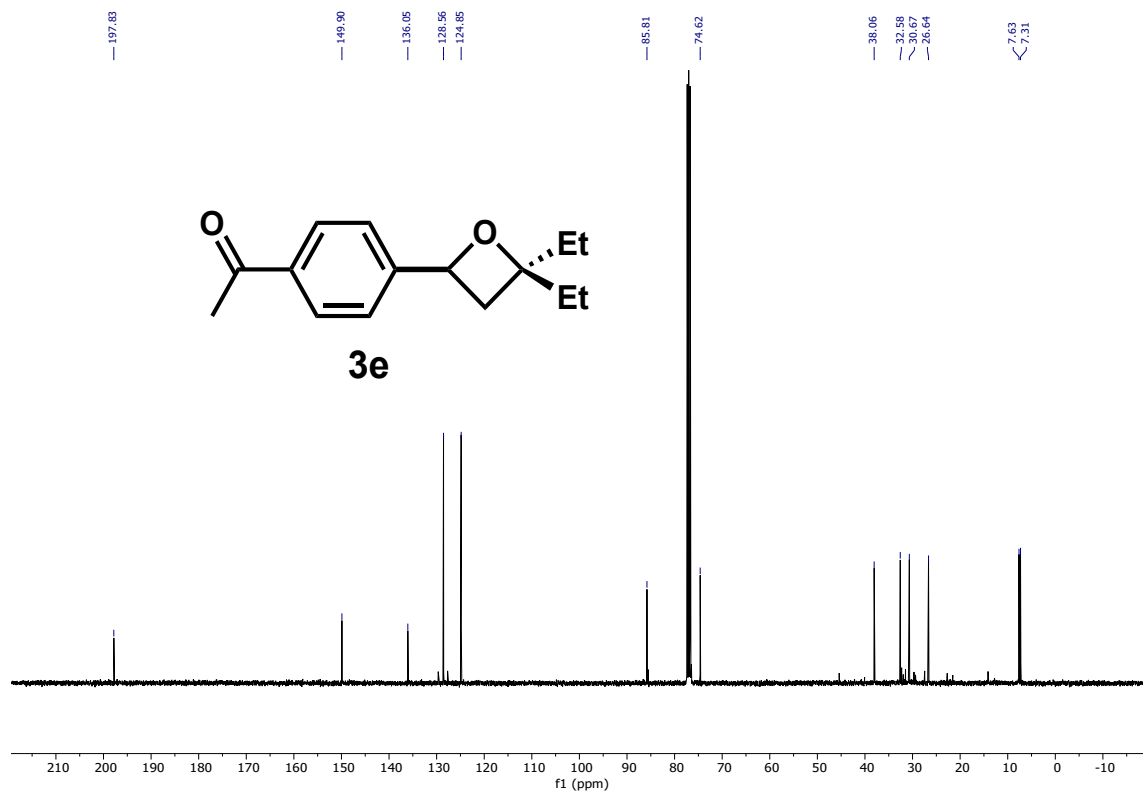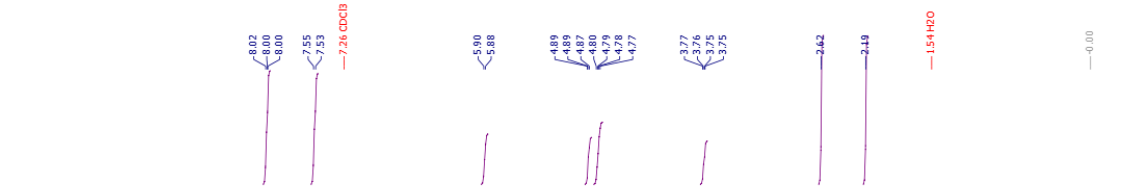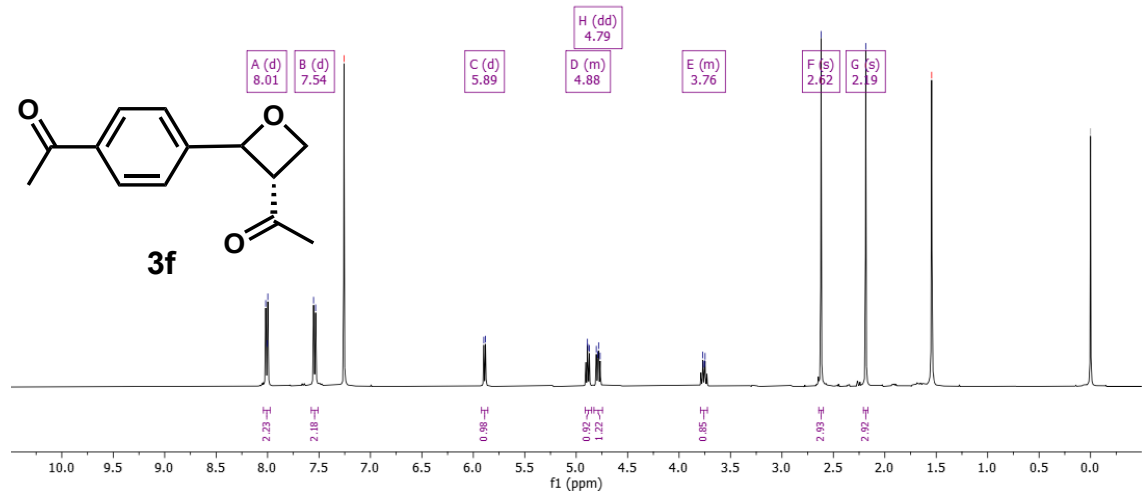

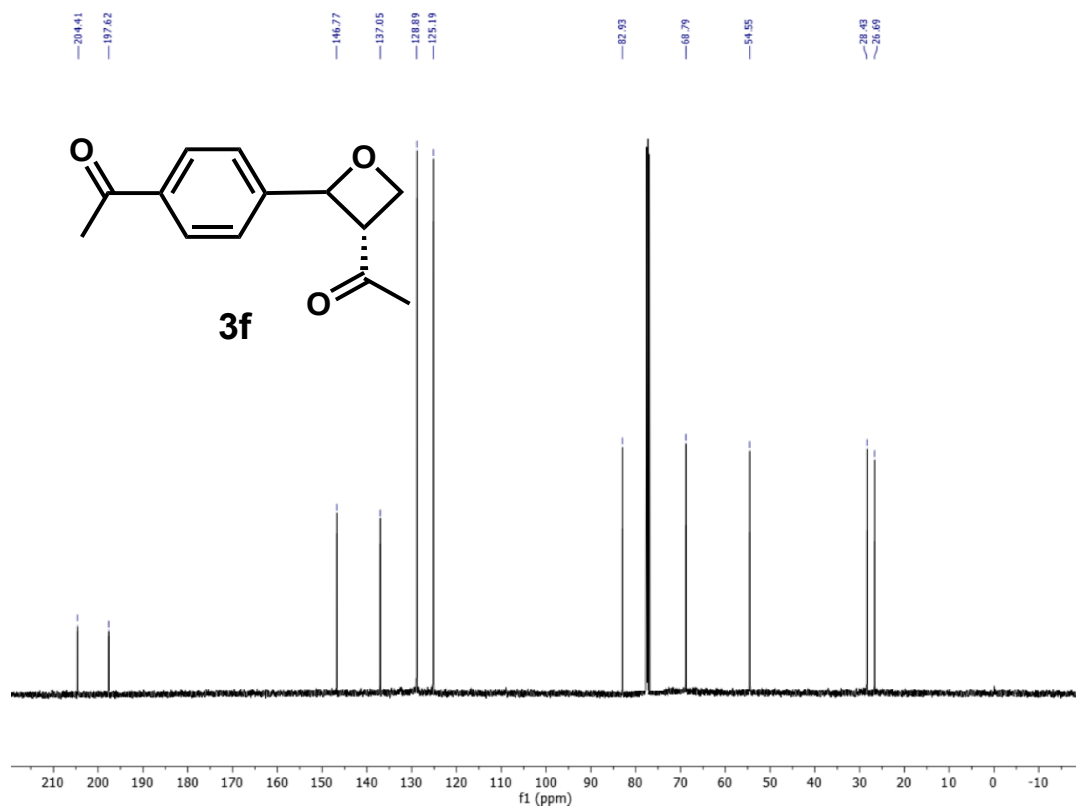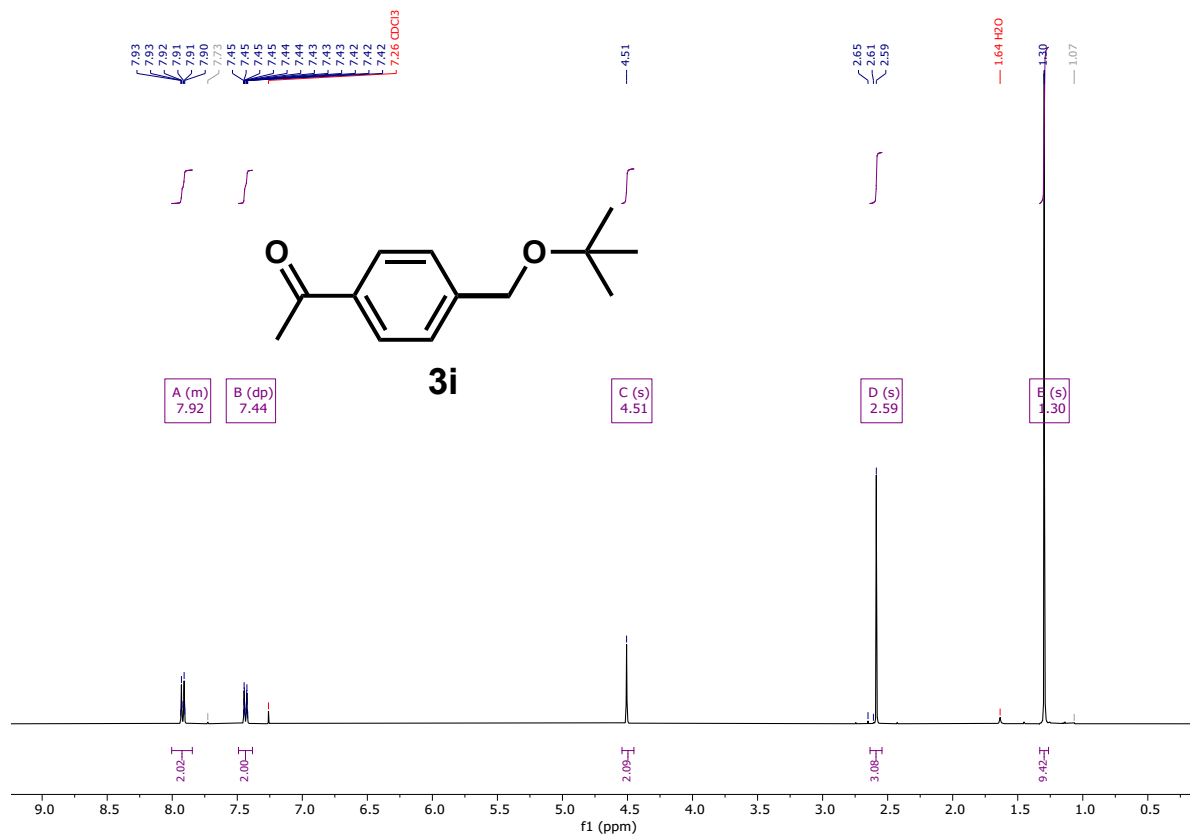

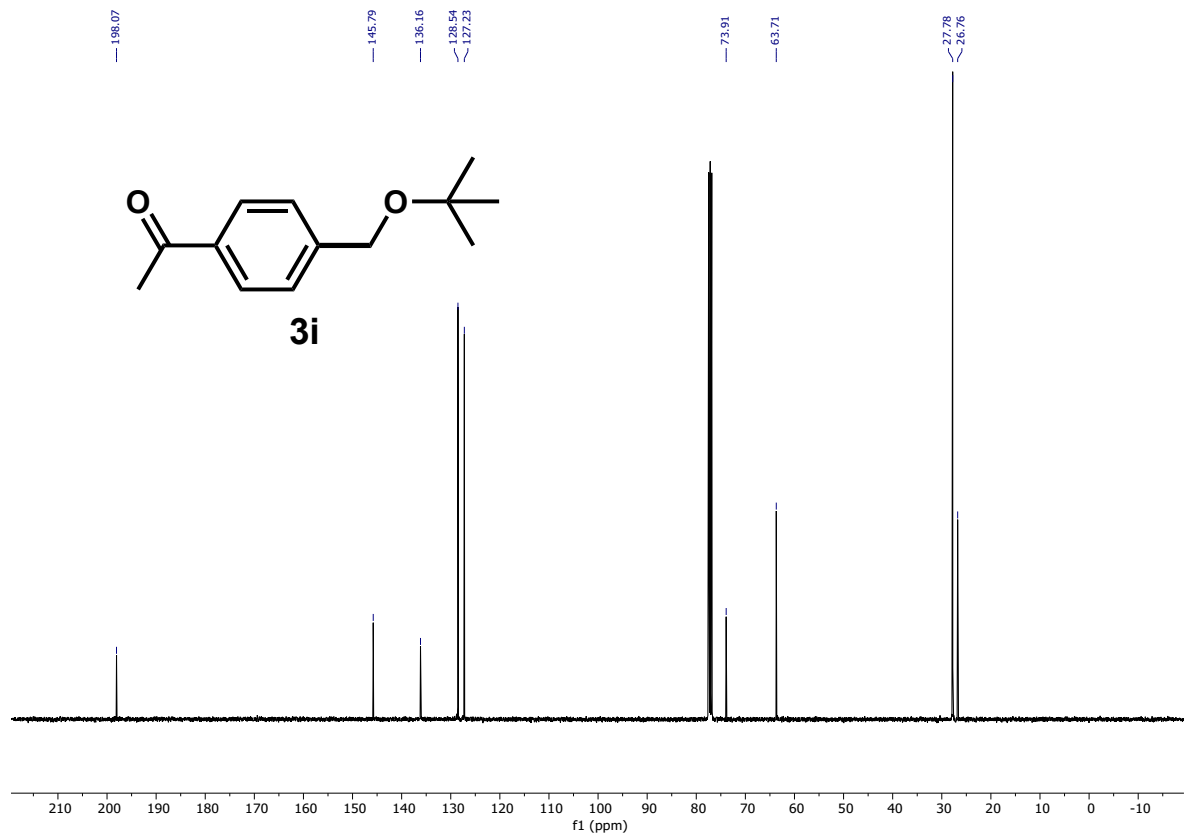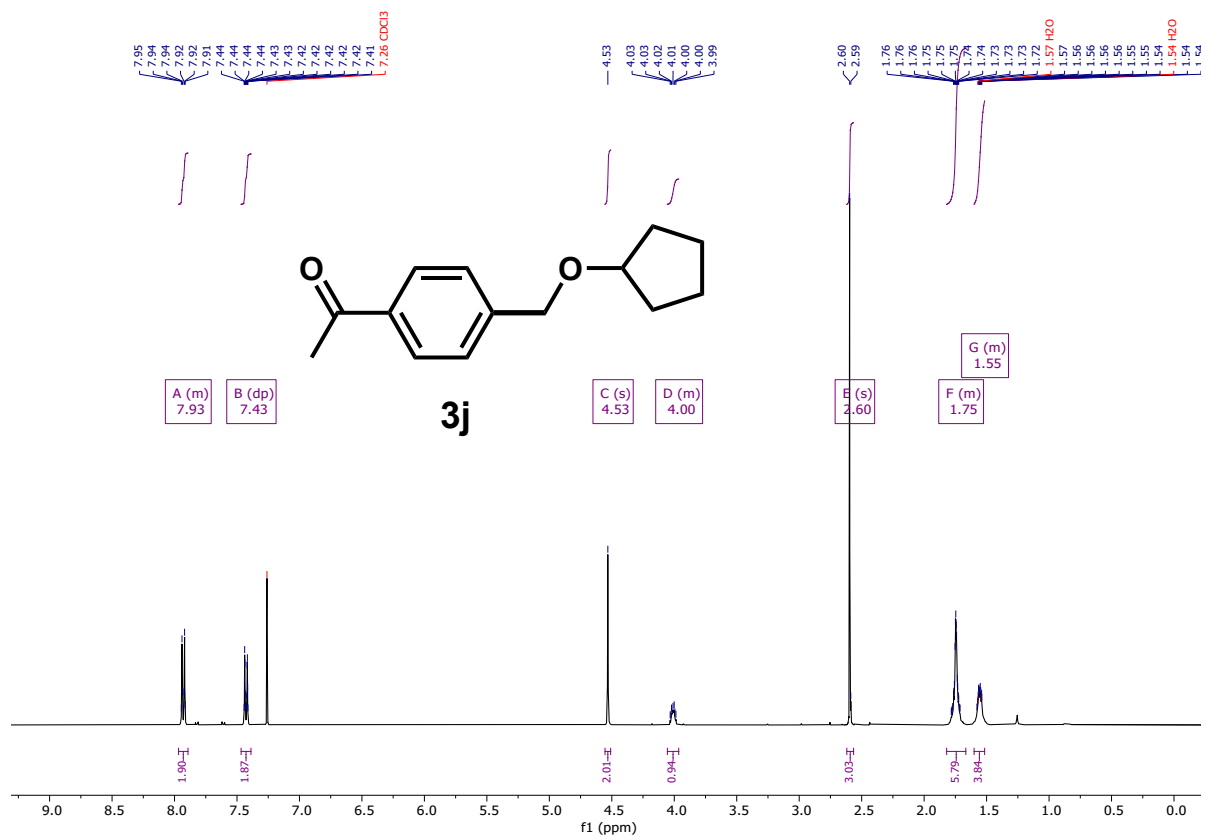



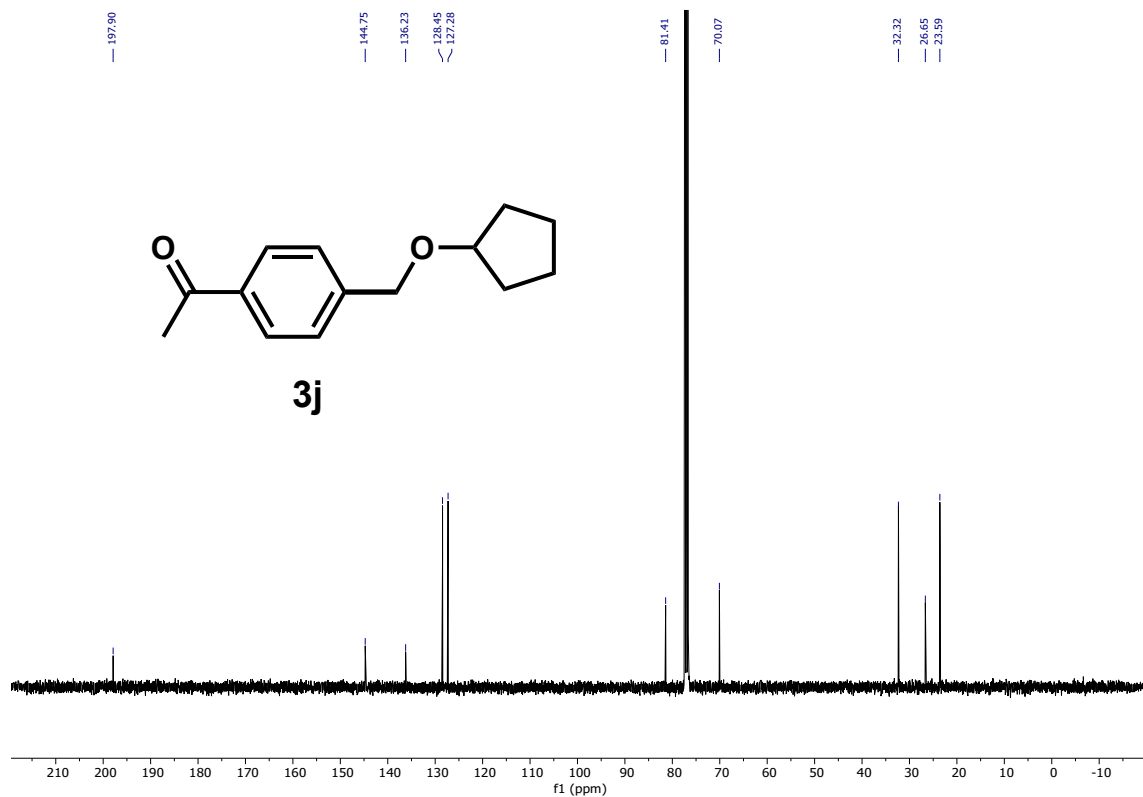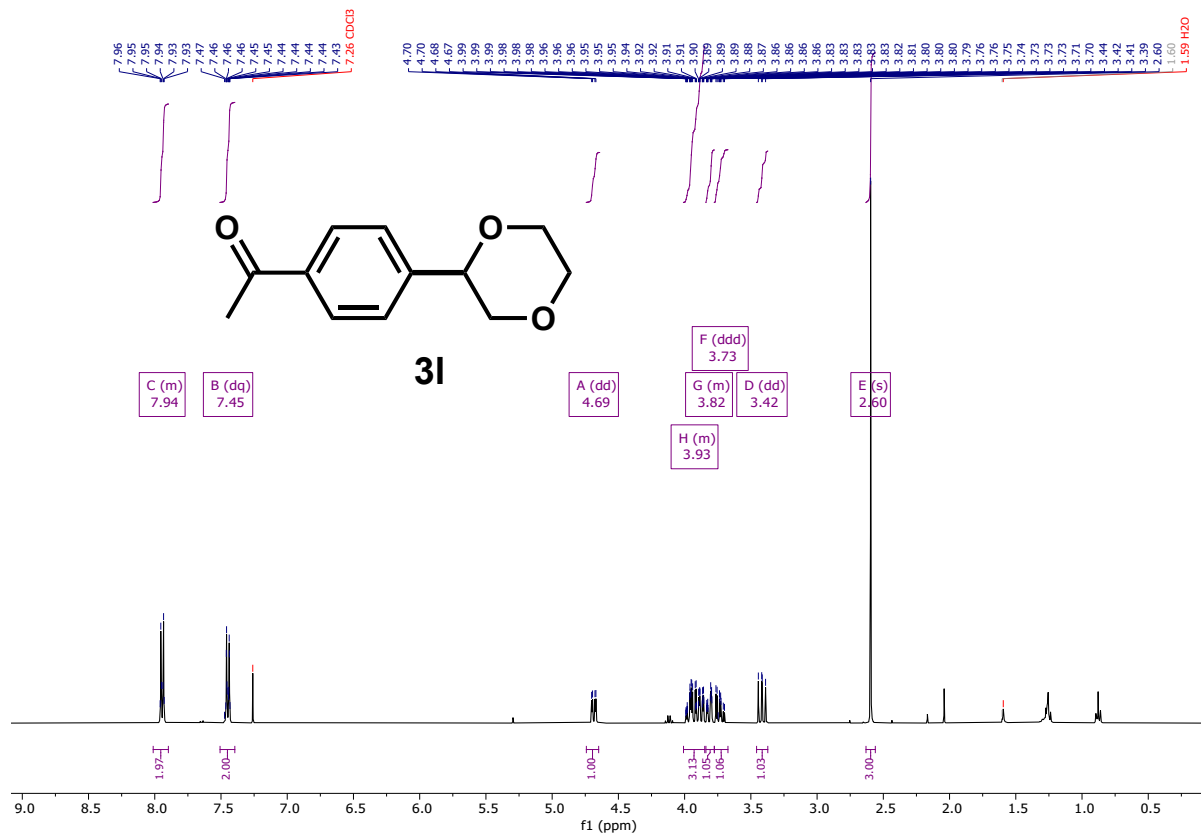

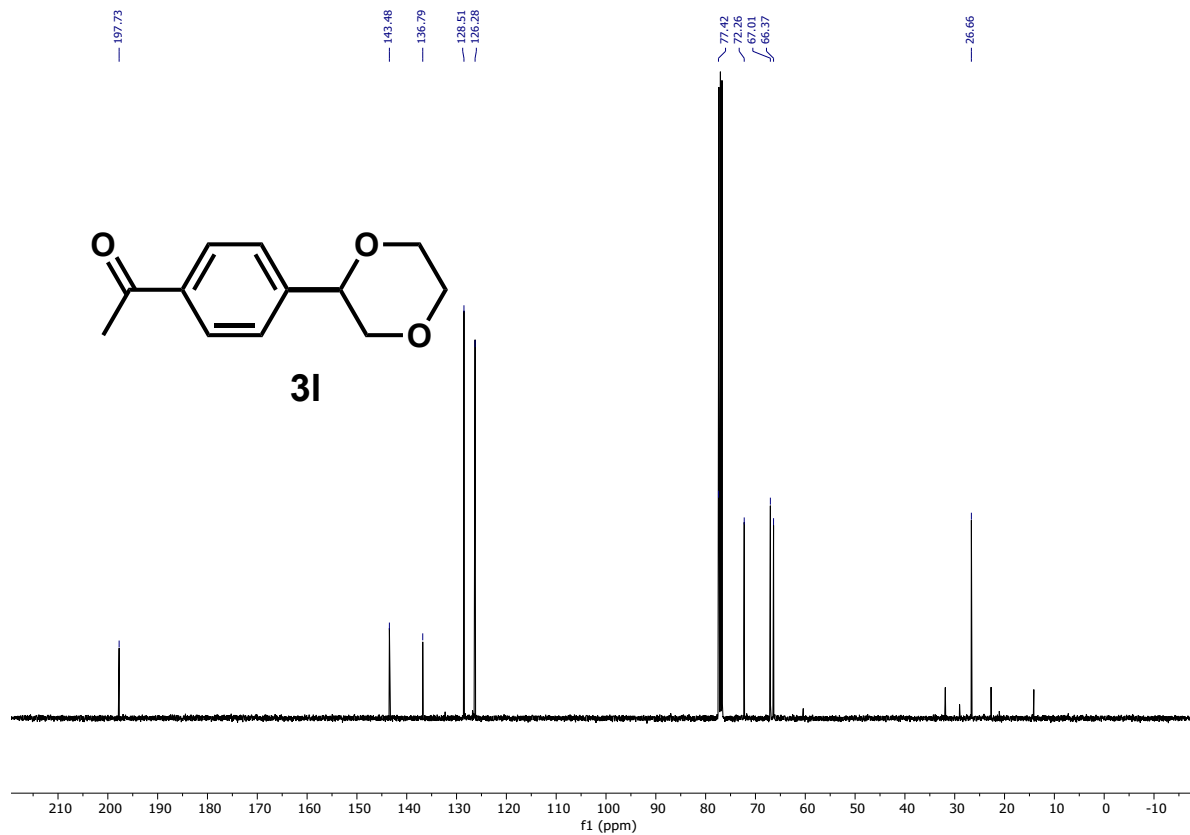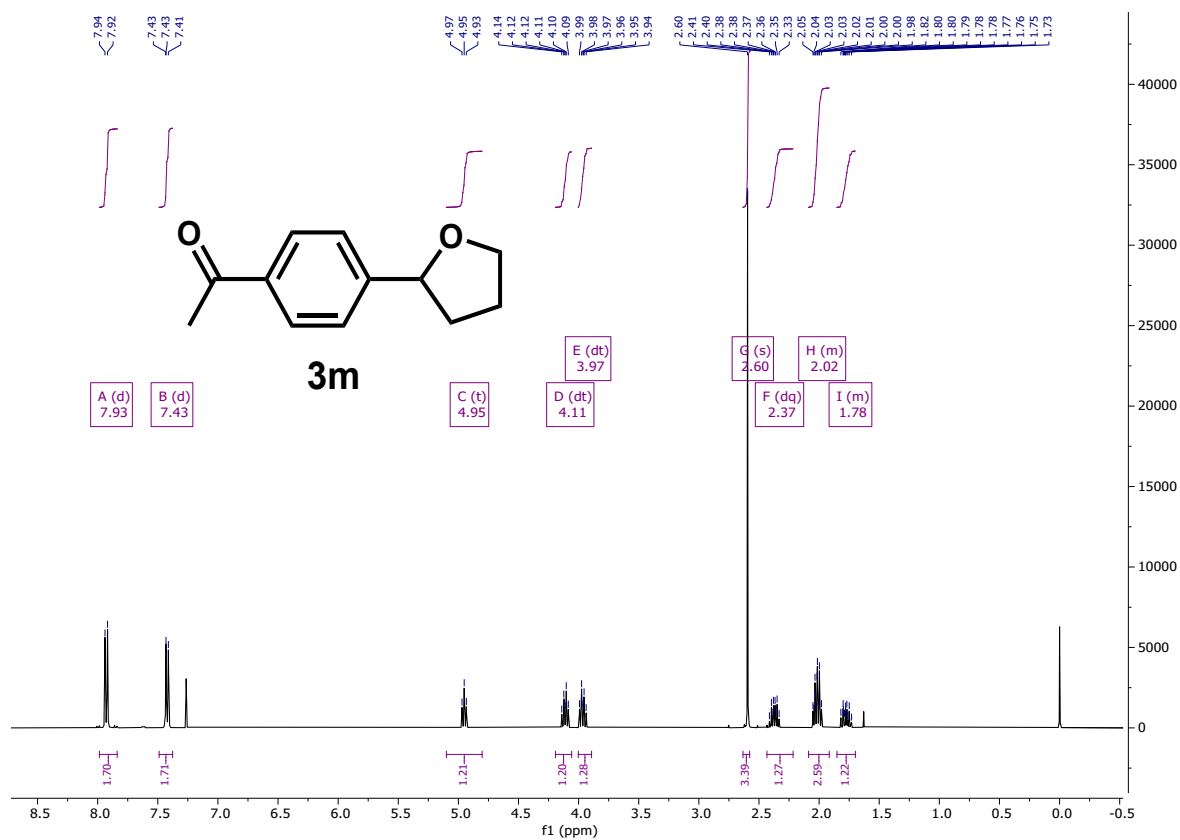

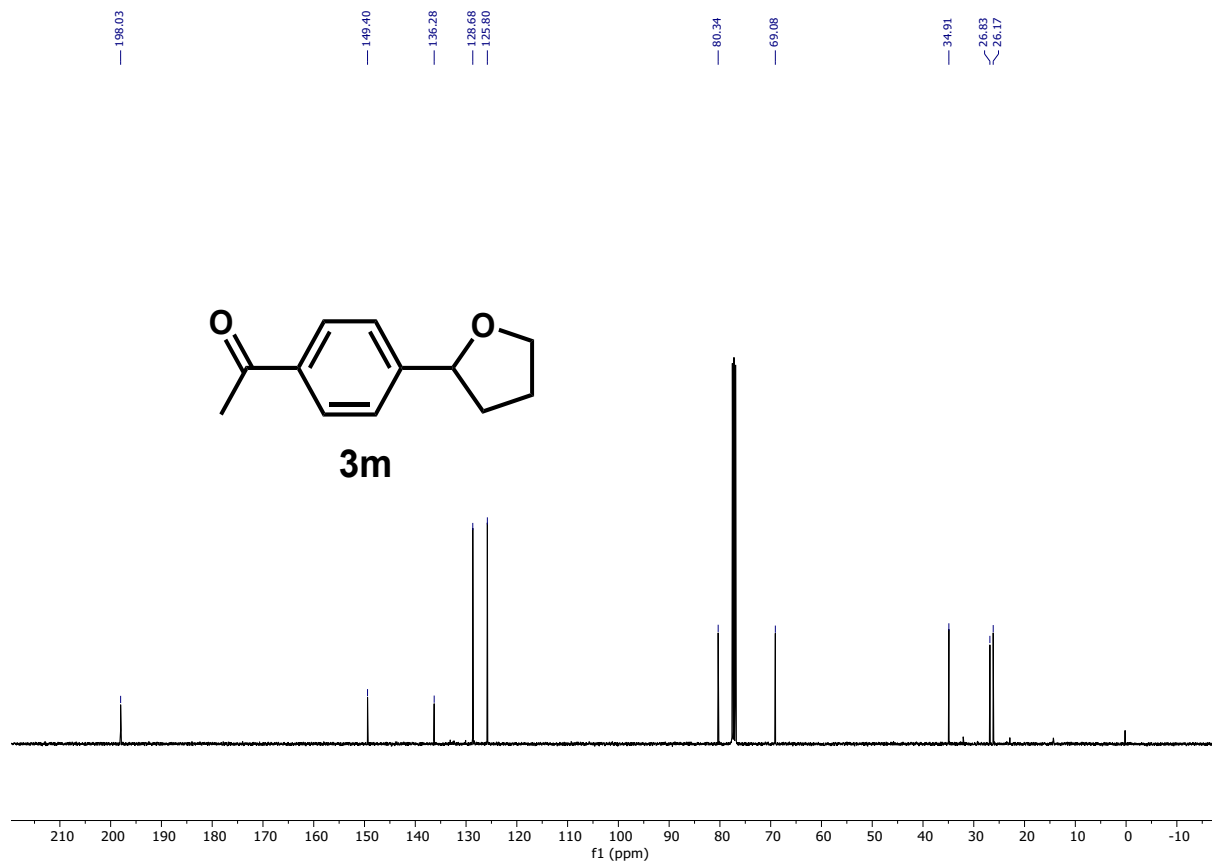

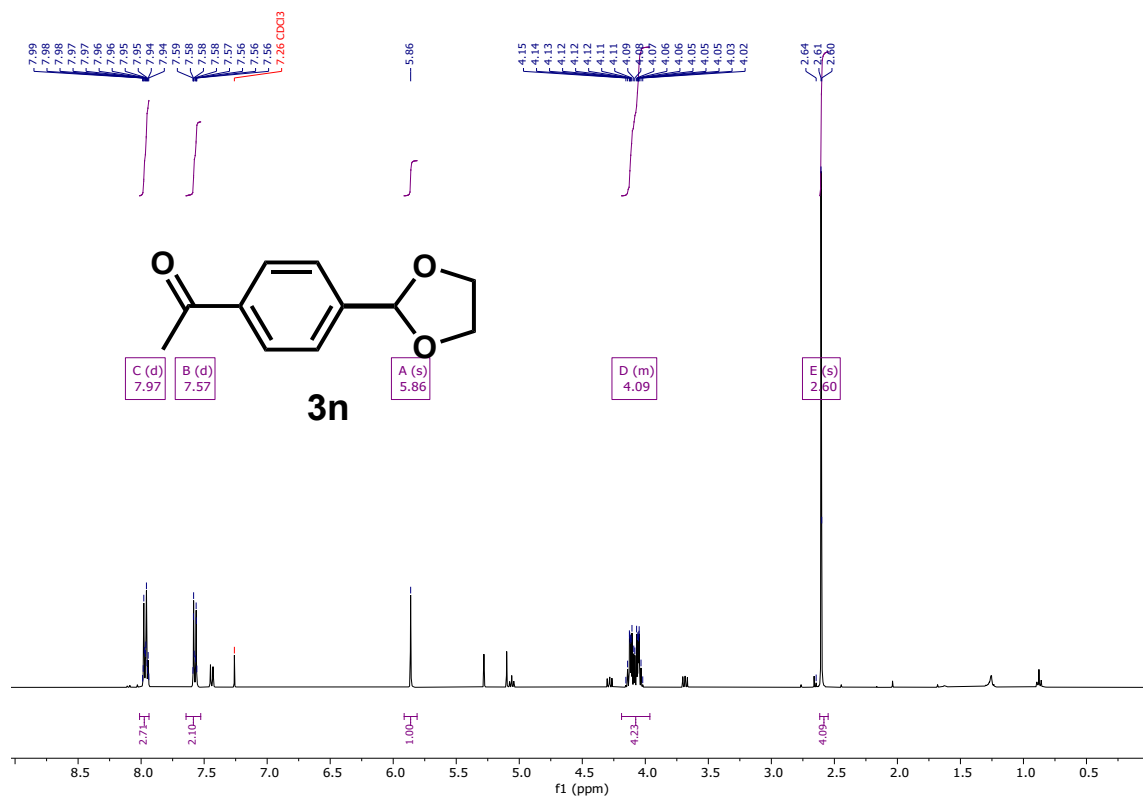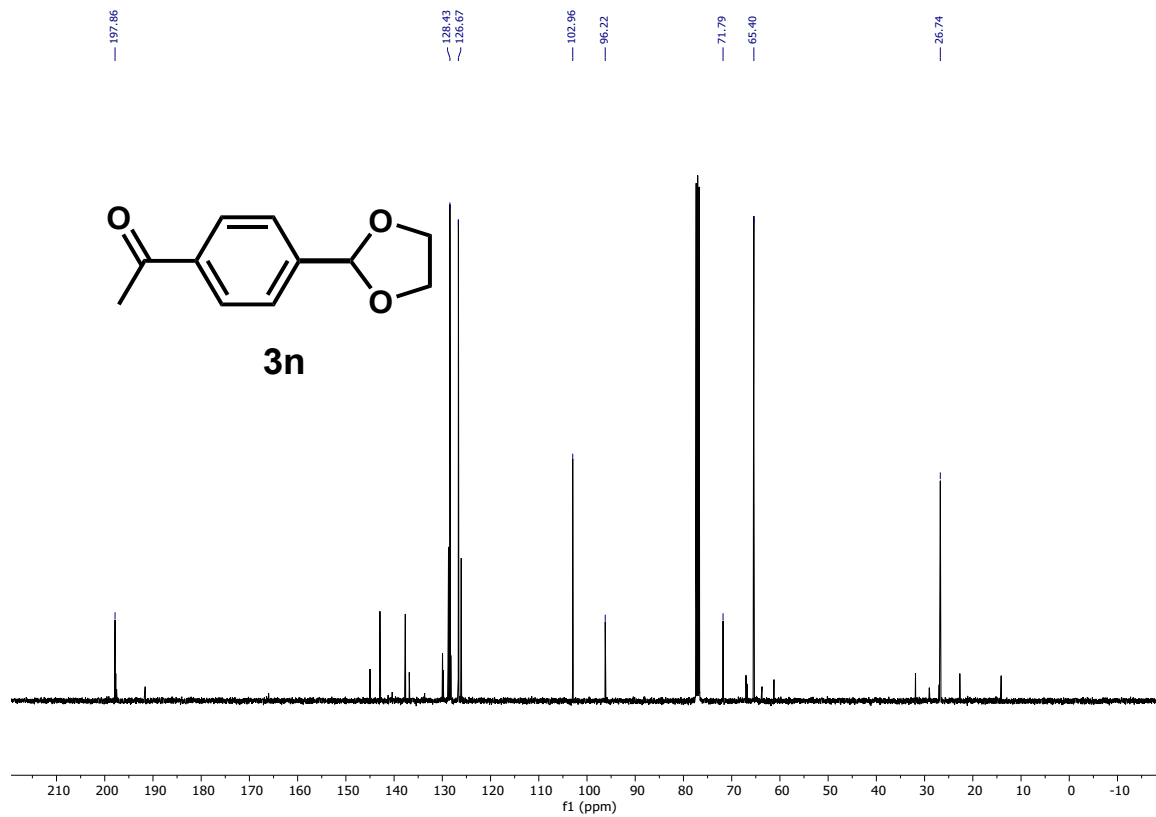

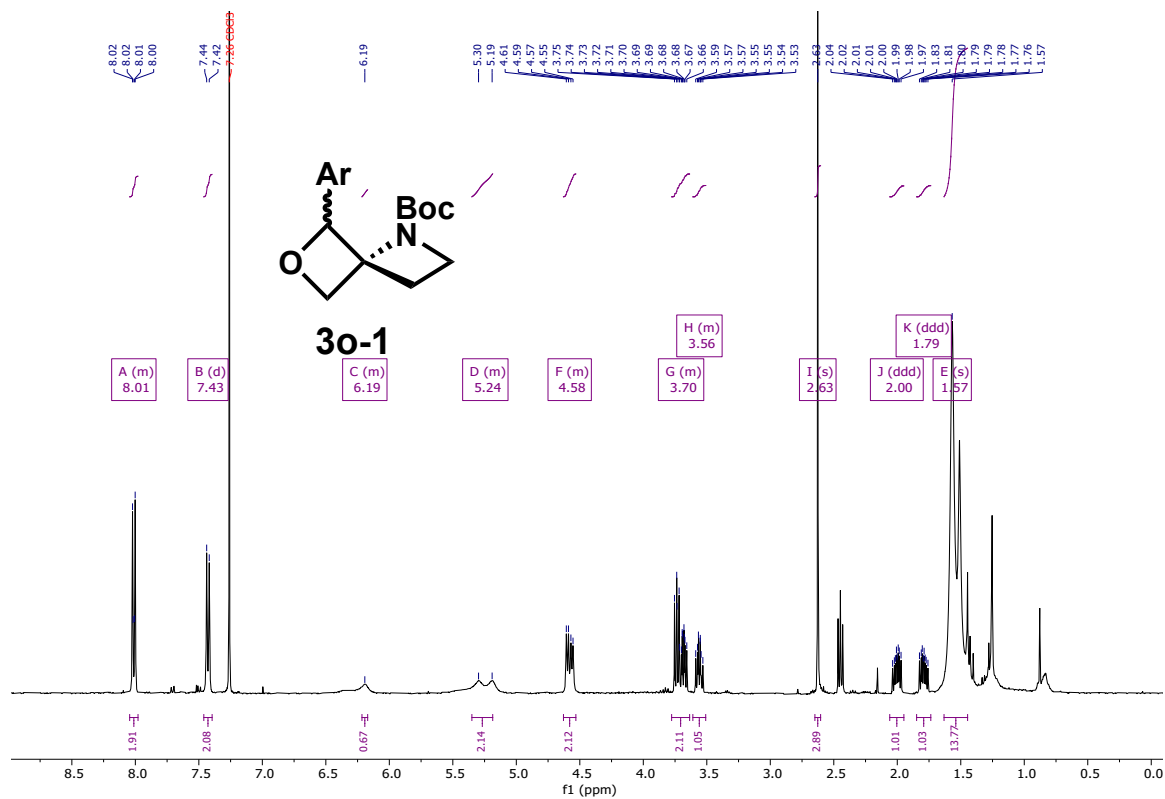

HMBC for **30-1** (CDCl<sub>3</sub>, 0 °C)

|                        |                      |                       |                     |
|------------------------|----------------------|-----------------------|---------------------|
| Frequency (MHz)        | (500.1300, 125.7578) | Mixing Time           | 0                   |
| Nucleus                | (1H, 13C)            | Number of Transients  | 64                  |
| Origin                 | Avance NEO 500       | Original Points Count | (1024, 256)         |
| Owner                  | SA-PRD-nmr42         | Points Count          | (4096, 1024)        |
| Pulse Sequence         | hmbcetapi3nd         | Solvent               | CHLOROFORM-d        |
| Spectrum Type          | HMBC                 | Sweep Width (Hz)      | (4309.29, 27645.06) |
| Temperature (degree C) | 0.144                |                       |                     |

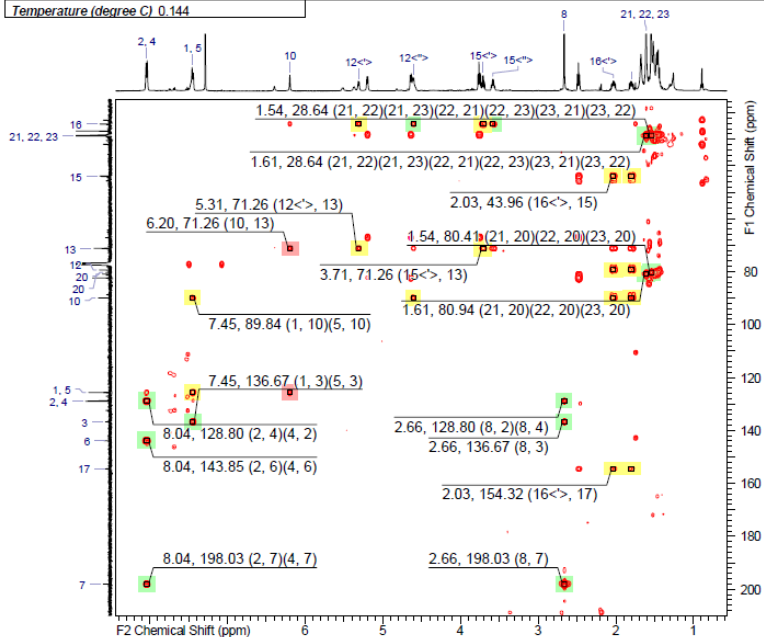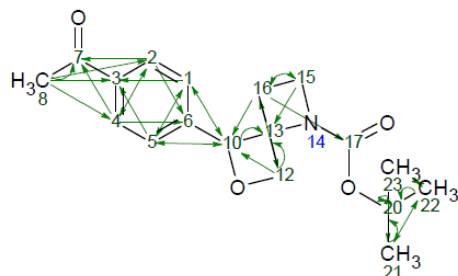

HSQC-DEPT for **3o-1** (CDCl<sub>3</sub>, 0 °C)

|                        |                      |                       |                     |
|------------------------|----------------------|-----------------------|---------------------|
| Frequency (MHz)        | (500.1300, 125.7578) | Mixing Time           | 0                   |
| Nucleus                | (1H, 13C)            | Number of Transients  | 16                  |
| Origin                 | Avance NEO 500       | Original Points Count | (1024, 256)         |
| Owner                  | SA-PRD-nmr42         | Points Count          | (1024, 1024)        |
| Pulse Sequence         | hsqcetgppisp2.3      | Solvent               | CHLOROFORM-d        |
| Spectrum Type          | HSQC-DEPT            | Sweep Width (Hz)      | (4306.14, 20732.00) |
| Temperature (degree C) | 0.179                |                       |                     |

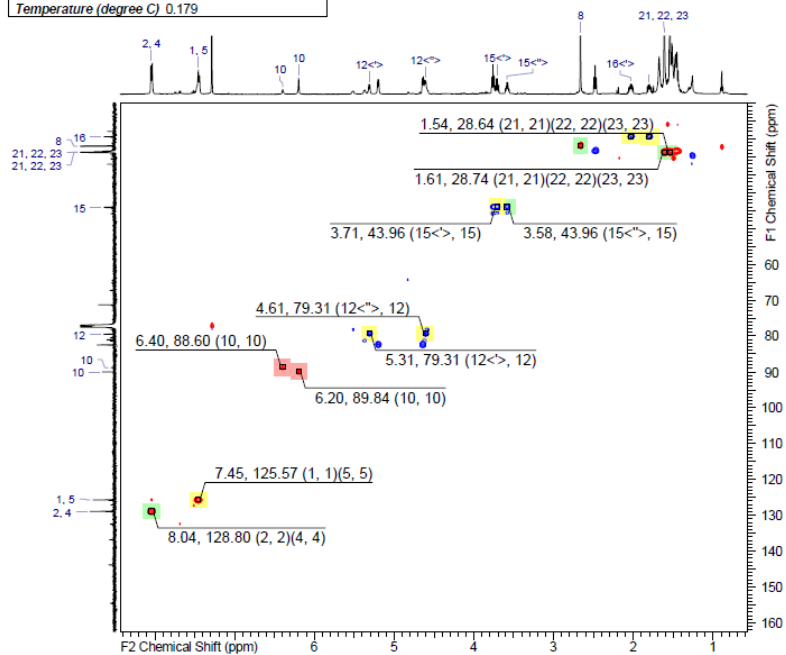

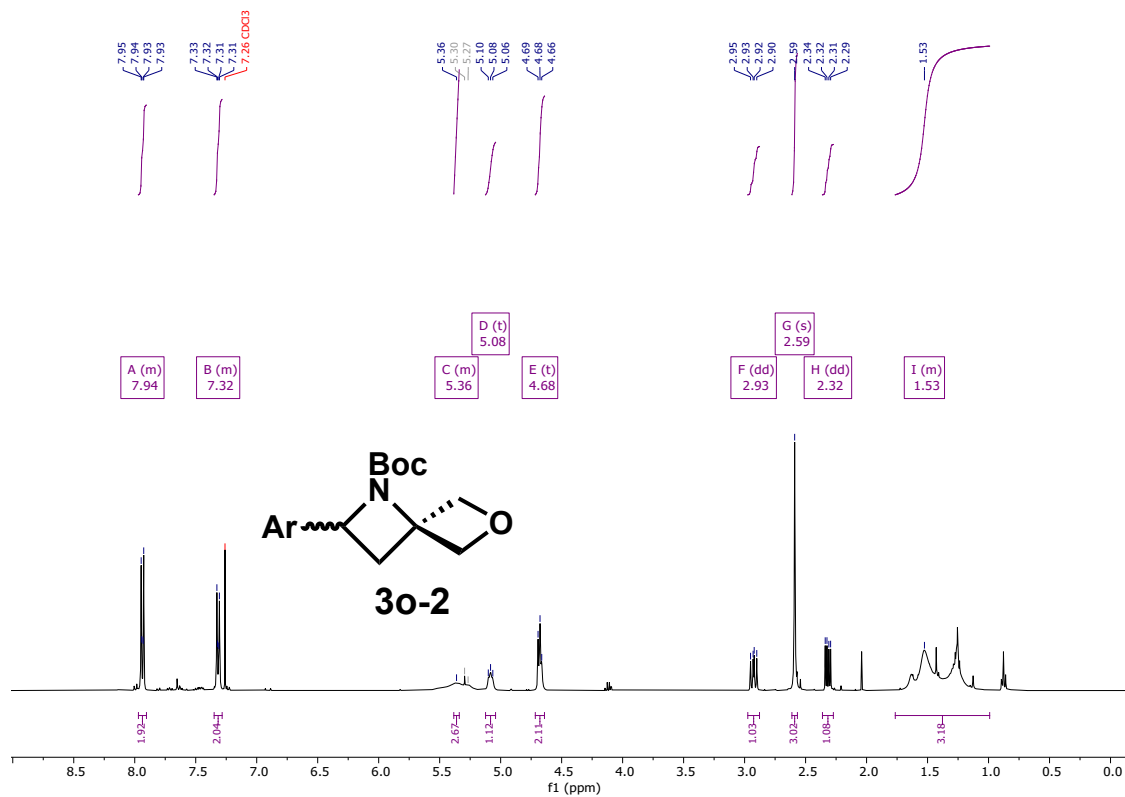

HMBC of **3o-2** (CDCl<sub>3</sub>, 0 °C)

|                      |                      |                       |                     |
|----------------------|----------------------|-----------------------|---------------------|
| Frequency (MHz)      | (500.1300, 125.7578) | Mixing Time           | 0                   |
| Nucleus              | (1H, 13C)            | Number of Transients  | 40                  |
| Origin               | Avance NEO 500       | Original Points Count | (1024, 256)         |
| Owner                | SA-PRD-nmr42         | Points Count          | (4096, 1024)        |
| Pulse Sequence       | hmbcetgpi3nd         | Solvent               | CHLOROFORM-d        |
| Spectrum Type        | HMBC                 | Sweep Width (Hz)      | (4309.29, 27645.06) |
| Temperature (degree) | 0.142, 6             |                       |                     |

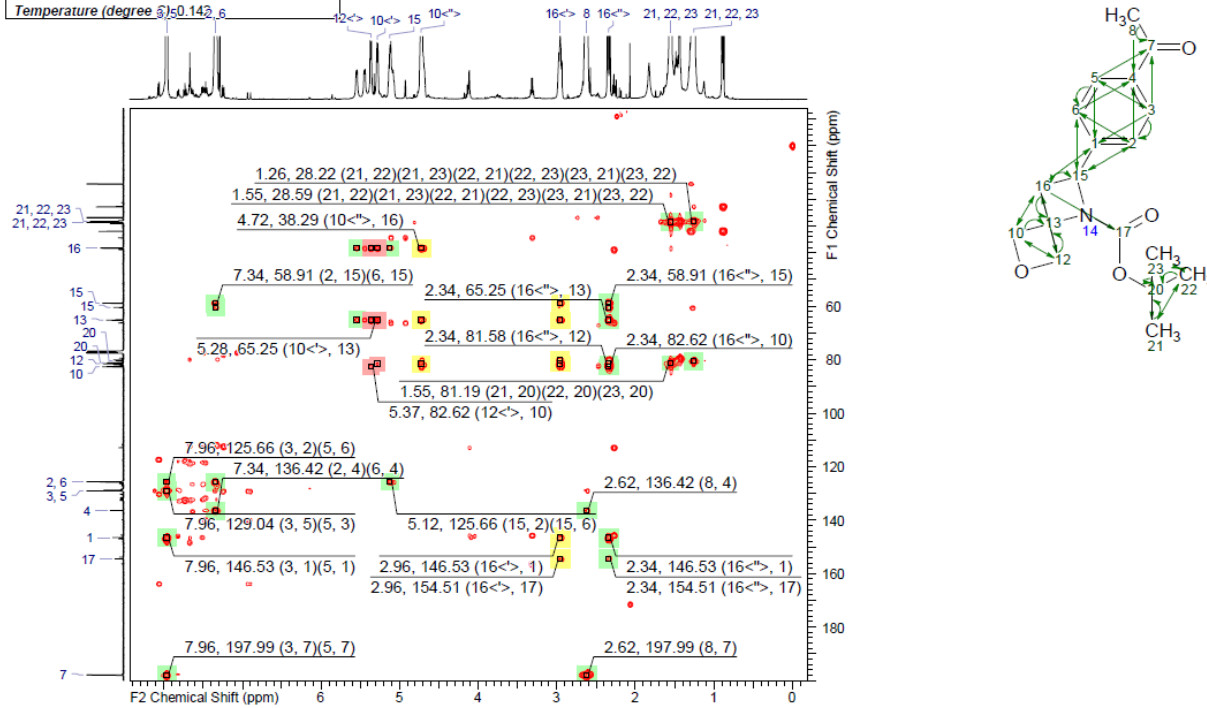

HSQC-DEPT of **3o-2** (CDCl<sub>3</sub>, 0 °C)

|                 |                      |                       |                     |
|-----------------|----------------------|-----------------------|---------------------|
| Frequency (MHz) | (500.1300, 125.7578) | Mixing Time           | 0                   |
| Nucleus         | (1H, 13C)            | Number of Transients  | 8                   |
| Origin          | Avance NEO 500       | Original Points Count | (1024, 256)         |
| Owner           | SA-PRD-nmr42         | Points Count          | (1024, 1024)        |
| Pulse Sequence  | hsqcetgppisp2.3      | Solvent               | CHLOROFORM-d        |
| Spectrum Type   | HSQC-DEPT            | Sweep Width (Hz)      | (4306.14, 20732.00) |

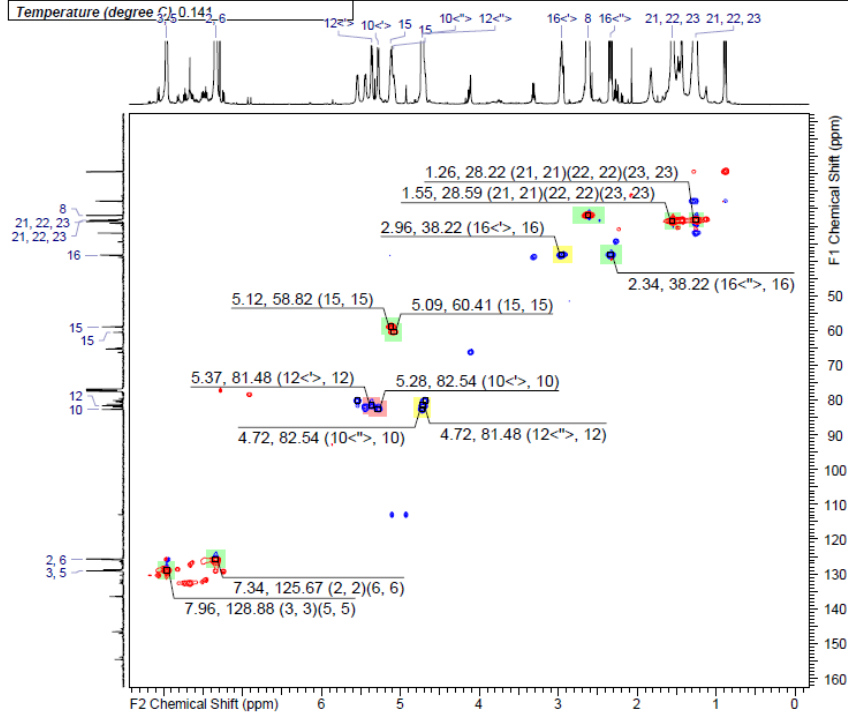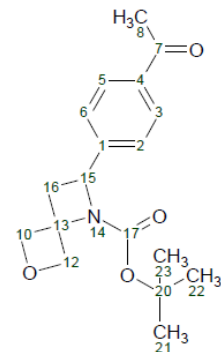



## VIII. HTE Data

**Table S2.** Full HTE data set. Reactions set up as described in General Procedure A.

| Photocatalyst (PC)              | PC % | Ni Catalyst               | Ni % | Base (2 equiv)                  | Oxetane Equivs | Solvent (0.1 M) | Additive | Additive % | Yield (%) |
|---------------------------------|------|---------------------------|------|---------------------------------|----------------|-----------------|----------|------------|-----------|
| benzaldehyde                    | 100  | (dtbbpy)NiBr <sub>2</sub> | 10   | K <sub>2</sub> HPO <sub>4</sub> | 10             | MeCN            |          |            | 0.0       |
| benzaldehyde                    | 100  | (dtbbpy)NiBr <sub>2</sub> | 10   | K <sub>2</sub> HPO <sub>4</sub> | 10             | DMSO            |          |            | 0.0       |
| benzaldehyde                    | 100  | (dtbbpy)NiBr <sub>2</sub> | 10   | K <sub>2</sub> HPO <sub>4</sub> | 10             | DCM             |          |            | 0.0       |
| benzaldehyde                    | 100  | (dtbbpy)NiBr <sub>2</sub> | 10   | K <sub>2</sub> HPO <sub>4</sub> | 10             | DMF             |          |            | 4.7       |
| benzaldehyde                    | 100  | (dtbbpy)NiBr <sub>2</sub> | 10   | K <sub>2</sub> HPO <sub>4</sub> | 10             | TFT             |          |            | 37.0      |
| benzaldehyde                    | 100  | (dtbbpy)NiBr <sub>2</sub> | 10   | K <sub>2</sub> HPO <sub>4</sub> | 10             | acetone         |          |            | 0.0       |
| benzaldehyde                    | 100  | (dtbbpy)NiBr <sub>2</sub> | 10   | Quinuclidine                    | 10             | MeCN            |          |            | 0.0       |
| benzaldehyde                    | 100  | (dtbbpy)NiBr <sub>2</sub> | 10   | Quinuclidine                    | 10             | DMSO            |          |            | 6.0       |
| benzaldehyde                    | 100  | (dtbbpy)NiBr <sub>2</sub> | 10   | Quinuclidine                    | 10             | DCM             |          |            | 0.0       |
| benzaldehyde                    | 100  | (dtbbpy)NiBr <sub>2</sub> | 10   | Quinuclidine                    | 10             | DMF             |          |            | 4.6       |
| benzaldehyde                    | 100  | (dtbbpy)NiBr <sub>2</sub> | 10   | Quinuclidine                    | 10             | TFT             |          |            | 3.7       |
| benzaldehyde                    | 100  | (dtbbpy)NiBr <sub>2</sub> | 10   | Quinuclidine                    | 10             | acetone         |          |            | 0.0       |
| p-anisaldehyde                  | 100  | (dtbbpy)NiBr <sub>2</sub> | 10   | K <sub>2</sub> HPO <sub>4</sub> | 10             | MeCN            |          |            | 0.0       |
| p-anisaldehyde                  | 100  | (dtbbpy)NiBr <sub>2</sub> | 10   | K <sub>2</sub> HPO <sub>4</sub> | 10             | DMSO            |          |            | 0.0       |
| p-anisaldehyde                  | 100  | (dtbbpy)NiBr <sub>2</sub> | 10   | K <sub>2</sub> HPO <sub>4</sub> | 10             | DCM             |          |            | 0.0       |
| p-anisaldehyde                  | 100  | (dtbbpy)NiBr <sub>2</sub> | 10   | K <sub>2</sub> HPO <sub>4</sub> | 10             | DMF             |          |            | 0.0       |
| p-anisaldehyde                  | 100  | (dtbbpy)NiBr <sub>2</sub> | 10   | K <sub>2</sub> HPO <sub>4</sub> | 10             | TFT             |          |            | 0.0       |
| p-anisaldehyde                  | 100  | (dtbbpy)NiBr <sub>2</sub> | 10   | K <sub>2</sub> HPO <sub>4</sub> | 10             | acetone         |          |            | 0.0       |
| p-anisaldehyde                  | 100  | (dtbbpy)NiBr <sub>2</sub> | 10   | Quinuclidine                    | 10             | MeCN            |          |            | 0.0       |
| p-anisaldehyde                  | 100  | (dtbbpy)NiBr <sub>2</sub> | 10   | Quinuclidine                    | 10             | DMSO            |          |            | 0.0       |
| p-anisaldehyde                  | 100  | (dtbbpy)NiBr <sub>2</sub> | 10   | Quinuclidine                    | 10             | DCM             |          |            | 0.0       |
| p-anisaldehyde                  | 100  | (dtbbpy)NiBr <sub>2</sub> | 10   | Quinuclidine                    | 10             | DMF             |          |            | 0.0       |
| p-anisaldehyde                  | 100  | (dtbbpy)NiBr <sub>2</sub> | 10   | Quinuclidine                    | 10             | TFT             |          |            | 0.0       |
| p-anisaldehyde                  | 100  | (dtbbpy)NiBr <sub>2</sub> | 10   | Quinuclidine                    | 10             | acetone         |          |            | 0.0       |
| p-CF <sub>3</sub> -benzaldehyde | 100  | (dtbbpy)NiBr <sub>2</sub> | 10   | K <sub>2</sub> HPO <sub>4</sub> | 10             | MeCN            |          |            | 77.7      |
| p-CF <sub>3</sub> -benzaldehyde | 100  | (dtbbpy)NiBr <sub>2</sub> | 10   | K <sub>2</sub> HPO <sub>4</sub> | 10             | DMSO            |          |            | 0.0       |
| p-CF <sub>3</sub> -benzaldehyde | 100  | (dtbbpy)NiBr <sub>2</sub> | 10   | K <sub>2</sub> HPO <sub>4</sub> | 10             | DCM             |          |            | 51.8      |
| p-CF <sub>3</sub> -benzaldehyde | 100  | (dtbbpy)NiBr <sub>2</sub> | 10   | K <sub>2</sub> HPO <sub>4</sub> | 10             | DMF             |          |            | 0.0       |
| p-CF <sub>3</sub> -benzaldehyde | 100  | (dtbbpy)NiBr <sub>2</sub> | 10   | K <sub>2</sub> HPO <sub>4</sub> | 10             | TFT             |          |            | 54.4      |
| p-CF <sub>3</sub> -benzaldehyde | 100  | (dtbbpy)NiBr <sub>2</sub> | 10   | K <sub>2</sub> HPO <sub>4</sub> | 10             | acetone         |          |            | 63.6      |
| p-CF <sub>3</sub> -benzaldehyde | 100  | (dtbbpy)NiBr <sub>2</sub> | 10   | Quinuclidine                    | 10             | MeCN            |          |            | 30.9      |
| p-CF <sub>3</sub> -benzaldehyde | 100  | (dtbbpy)NiBr <sub>2</sub> | 10   | Quinuclidine                    | 10             | DMSO            |          |            | 4.9       |
| p-CF <sub>3</sub> -benzaldehyde | 100  | (dtbbpy)NiBr <sub>2</sub> | 10   | Quinuclidine                    | 10             | DCM             |          |            | 7.1       |
| p-CF <sub>3</sub> -benzaldehyde | 100  | (dtbbpy)NiBr <sub>2</sub> | 10   | Quinuclidine                    | 10             | DMF             |          |            | 0.0       |
| p-CF <sub>3</sub> -benzaldehyde | 100  | (dtbbpy)NiBr <sub>2</sub> | 10   | Quinuclidine                    | 10             | TFT             |          |            | 87.9      |
| p-CF <sub>3</sub> -benzaldehyde | 100  | (dtbbpy)NiBr <sub>2</sub> | 10   | Quinuclidine                    | 10             | acetone         |          |            | 46.7      |
| benzophenone                    | 100  | (dtbbpy)NiBr <sub>2</sub> | 10   | K <sub>2</sub> HPO <sub>4</sub> | 10             | MeCN            |          |            | 0.0       |
| benzophenone                    | 100  | (dtbbpy)NiBr <sub>2</sub> | 10   | K <sub>2</sub> HPO <sub>4</sub> | 10             | DMSO            |          |            | 7.0       |

|              |     |               |    |              |    |         |  |      |
|--------------|-----|---------------|----|--------------|----|---------|--|------|
| benzophenone | 100 | (dtbbpy)NiBr2 | 10 | K2HPO4       | 10 | DCM     |  | 0.0  |
| benzophenone | 100 | (dtbbpy)NiBr2 | 10 | K2HPO4       | 10 | DMF     |  | 7.8  |
| benzophenone | 100 | (dtbbpy)NiBr2 | 10 | K2HPO4       | 10 | TFT     |  | 21.1 |
| benzophenone | 100 | (dtbbpy)NiBr2 | 10 | K2HPO4       | 10 | acetone |  | 20.3 |
| benzophenone | 100 | (dtbbpy)NiBr2 | 10 | Quinuclidine | 10 | MeCN    |  | 36.9 |
| benzophenone | 100 | (dtbbpy)NiBr2 | 10 | Quinuclidine | 10 | DMSO    |  | 35.3 |
| benzophenone | 100 | (dtbbpy)NiBr2 | 10 | Quinuclidine | 10 | DCM     |  | 2.8  |
| benzophenone | 100 | (dtbbpy)NiBr2 | 10 | Quinuclidine | 10 | DMF     |  | 13.1 |
| benzophenone | 100 | (dtbbpy)NiBr2 | 10 | Quinuclidine | 10 | TFT     |  | 35.0 |
| benzophenone | 100 | (dtbbpy)NiBr2 | 10 | Quinuclidine | 10 | acetone |  | 36.8 |
| none         | 0   | (dtbbpy)NiBr2 | 10 | K2HPO4       | 10 | MeCN    |  | 0.0  |
| none         | 0   | (dtbbpy)NiBr2 | 10 | K2HPO4       | 10 | DMSO    |  | 2.8  |
| none         | 0   | (dtbbpy)NiBr2 | 10 | K2HPO4       | 10 | DCM     |  | 0.0  |
| none         | 0   | (dtbbpy)NiBr2 | 10 | K2HPO4       | 10 | DMF     |  | 0.0  |
| none         | 0   | (dtbbpy)NiBr2 | 10 | K2HPO4       | 10 | TFT     |  | 0.0  |
| none         | 0   | (dtbbpy)NiBr2 | 10 | K2HPO4       | 10 | acetone |  | 0.0  |
| none         | 0   | (dtbbpy)NiBr2 | 10 | Quinuclidine | 10 | MeCN    |  | 0.0  |
| none         | 0   | (dtbbpy)NiBr2 | 10 | Quinuclidine | 10 | DMSO    |  | 3.5  |
| none         | 0   | (dtbbpy)NiBr2 | 10 | Quinuclidine | 10 | DCM     |  | 0.0  |
| none         | 0   | (dtbbpy)NiBr2 | 10 | Quinuclidine | 10 | DMF     |  | 0.0  |
| none         | 0   | (dtbbpy)NiBr2 | 10 | Quinuclidine | 10 | TFT     |  | 0.0  |
| none         | 0   | (dtbbpy)NiBr2 | 10 | Quinuclidine | 10 | acetone |  | 0.0  |
| Eosin Y      | 100 | (dtbbpy)NiBr2 | 10 | K2HPO4       | 10 | MeCN    |  | 0.0  |
| Eosin Y      | 100 | (dtbbpy)NiBr2 | 10 | K2HPO4       | 10 | DMSO    |  | 0.0  |
| Eosin Y      | 100 | (dtbbpy)NiBr2 | 10 | K2HPO4       | 10 | DCM     |  | 0.0  |
| Eosin Y      | 100 | (dtbbpy)NiBr2 | 10 | K2HPO4       | 10 | DMF     |  | 0.0  |
| Eosin Y      | 100 | (dtbbpy)NiBr2 | 10 | K2HPO4       | 10 | TFT     |  | 0.0  |
| Eosin Y      | 100 | (dtbbpy)NiBr2 | 10 | K2HPO4       | 10 | acetone |  | 0.0  |
| Eosin Y      | 100 | (dtbbpy)NiBr2 | 10 | Quinuclidine | 10 | MeCN    |  | 0.0  |
| Eosin Y      | 100 | (dtbbpy)NiBr2 | 10 | Quinuclidine | 10 | DMSO    |  | 0.0  |
| Eosin Y      | 100 | (dtbbpy)NiBr2 | 10 | Quinuclidine | 10 | DCM     |  | 0.0  |
| Eosin Y      | 100 | (dtbbpy)NiBr2 | 10 | Quinuclidine | 10 | DMF     |  | 0.0  |
| Eosin Y      | 100 | (dtbbpy)NiBr2 | 10 | Quinuclidine | 10 | TFT     |  | 0.0  |
| Eosin Y      | 100 | (dtbbpy)NiBr2 | 10 | Quinuclidine | 10 | acetone |  | 0.0  |
| TBADT        | 10  | (dtbbpy)NiBr2 | 10 | K2HPO4       | 10 | MeCN    |  | 42.7 |
| TBADT        | 10  | (dtbbpy)NiBr2 | 10 | K2HPO4       | 10 | DMSO    |  | 3.1  |
| TBADT        | 10  | (dtbbpy)NiBr2 | 10 | K2HPO4       | 10 | DCM     |  | 16.0 |
| TBADT        | 10  | (dtbbpy)NiBr2 | 10 | K2HPO4       | 10 | DMF     |  | 2.2  |
| TBADT        | 10  | (dtbbpy)NiBr2 | 10 | K2HPO4       | 10 | TFT     |  | 16.9 |
| TBADT        | 10  | (dtbbpy)NiBr2 | 10 | K2HPO4       | 10 | acetone |  | 54.3 |
| TBADT        | 10  | (dtbbpy)NiBr2 | 10 | Quinuclidine | 10 | MeCN    |  | 0.0  |
| TBADT        | 10  | (dtbbpy)NiBr2 | 10 | Quinuclidine | 10 | DMSO    |  | 4.4  |
| TBADT        | 10  | (dtbbpy)NiBr2 | 10 | Quinuclidine | 10 | DCM     |  | 0.0  |

|                              |     |               |    |              |    |         |  |  |      |
|------------------------------|-----|---------------|----|--------------|----|---------|--|--|------|
| TBADT                        | 10  | (dtbbpy)NiBr2 | 10 | Quinuclidine | 10 | DMF     |  |  | 0.0  |
| TBADT                        | 10  | (dtbbpy)NiBr2 | 10 | Quinuclidine | 10 | TFT     |  |  | 0.0  |
| TBADT                        | 10  | (dtbbpy)NiBr2 | 10 | Quinuclidine | 10 | acetone |  |  | 0.0  |
| (Ir[dF(CF3)ppy]2(dtbbpy))PF6 | 10  | (dtbbpy)NiBr2 | 10 | K2HPO4       | 10 | MeCN    |  |  | 0.0  |
| (Ir[dF(CF3)ppy]2(dtbbpy))PF6 | 10  | (dtbbpy)NiBr2 | 10 | K2HPO4       | 10 | DMSO    |  |  | 0.0  |
| (Ir[dF(CF3)ppy]2(dtbbpy))PF6 | 10  | (dtbbpy)NiBr2 | 10 | K2HPO4       | 10 | DCM     |  |  | 0.0  |
| (Ir[dF(CF3)ppy]2(dtbbpy))PF6 | 10  | (dtbbpy)NiBr2 | 10 | K2HPO4       | 10 | DMF     |  |  | 0.0  |
| (Ir[dF(CF3)ppy]2(dtbbpy))PF6 | 10  | (dtbbpy)NiBr2 | 10 | K2HPO4       | 10 | TFT     |  |  | 0.0  |
| (Ir[dF(CF3)ppy]2(dtbbpy))PF6 | 10  | (dtbbpy)NiBr2 | 10 | K2HPO4       | 10 | acetone |  |  | 0.0  |
| (Ir[dF(CF3)ppy]2(dtbbpy))PF6 | 10  | (dtbbpy)NiBr2 | 10 | Quinuclidine | 10 | MeCN    |  |  | 13.9 |
| (Ir[dF(CF3)ppy]2(dtbbpy))PF6 | 10  | (dtbbpy)NiBr2 | 10 | Quinuclidine | 10 | DMSO    |  |  | 75.3 |
| (Ir[dF(CF3)ppy]2(dtbbpy))PF6 | 10  | (dtbbpy)NiBr2 | 10 | Quinuclidine | 10 | DCM     |  |  | 0.0  |
| (Ir[dF(CF3)ppy]2(dtbbpy))PF6 | 10  | (dtbbpy)NiBr2 | 10 | Quinuclidine | 10 | DMF     |  |  | 8.0  |
| (Ir[dF(CF3)ppy]2(dtbbpy))PF6 | 10  | (dtbbpy)NiBr2 | 10 | Quinuclidine | 10 | TFT     |  |  | 0.0  |
| (Ir[dF(CF3)ppy]2(dtbbpy))PF6 | 10  | (dtbbpy)NiBr2 | 10 | Quinuclidine | 10 | acetone |  |  | 6.4  |
| (Ir[dF(CF3)ppy]2(dtbbpy))PF6 | 10  | (dtbbpy)NiBr2 | 10 | K2HPO4       | 10 | TFT     |  |  | 0.0  |
| p-CF3-benzaldehyde           | 100 | (dtbbpy)NiBr2 | 10 | K2HPO4       | 10 | TFT     |  |  | 0.0  |
| p-CN-benzaldehyde            | 100 | (dtbbpy)NiBr2 | 10 | K2HPO4       | 10 | TFT     |  |  | 70.0 |
| p-NO2-benzaldehyde           | 100 | (dtbbpy)NiBr2 | 10 | K2HPO4       | 10 | TFT     |  |  | 0.0  |
| m-CHO-benzaldehyde           | 100 | (dtbbpy)NiBr2 | 10 | K2HPO4       | 10 | TFT     |  |  | 45.7 |
| 3,5-diCF3-benzaldehyde       | 100 | (dtbbpy)NiBr2 | 10 | K2HPO4       | 10 | TFT     |  |  | 51.4 |
| 3-py-carboxaldehyde          | 100 | (dtbbpy)NiBr2 | 10 | K2HPO4       | 10 | TFT     |  |  | 39.8 |
| 4-py-carboxaldehyde          | 100 | (dtbbpy)NiBr2 | 10 | K2HPO4       | 10 | TFT     |  |  | 0.0  |
| pentafluorobenzaldehyde      | 100 | (dtbbpy)NiBr2 | 10 | K2HPO4       | 10 | TFT     |  |  | 48.5 |
| p-Ac-benzaldehyde            | 100 | (dtbbpy)NiBr2 | 10 | K2HPO4       | 10 | TFT     |  |  | 54.4 |
| 2-naphthaldehyde             | 100 | (dtbbpy)NiBr2 | 10 | K2HPO4       | 10 | TFT     |  |  | 0.0  |
| o-Me-benzaldehyde            | 100 | (dtbbpy)NiBr2 | 10 | K2HPO4       | 10 | TFT     |  |  | 6.7  |
| (Ir[dF(CF3)ppy]2(dtbbpy))PF6 | 10  | (dtbbpy)NiBr2 | 10 | Cs2CO3       | 10 | TFT     |  |  | 0.0  |
| p-CF3-benzaldehyde           | 100 | (dtbbpy)NiBr2 | 10 | Cs2CO3       | 10 | TFT     |  |  | 36.9 |
| p-CN-benzaldehyde            | 100 | (dtbbpy)NiBr2 | 10 | Cs2CO3       | 10 | TFT     |  |  | 54.8 |
| p-NO2-benzaldehyde           | 100 | (dtbbpy)NiBr2 | 10 | Cs2CO3       | 10 | TFT     |  |  | 0.0  |
| m-CHO-benzaldehyde           | 100 | (dtbbpy)NiBr2 | 10 | Cs2CO3       | 10 | TFT     |  |  | 35.5 |
| 3,5-diCF3-benzaldehyde       | 100 | (dtbbpy)NiBr2 | 10 | Cs2CO3       | 10 | TFT     |  |  | 42.0 |
| 3-py-carboxaldehyde          | 100 | (dtbbpy)NiBr2 | 10 | Cs2CO3       | 10 | TFT     |  |  | 34.1 |
| 4-py-carboxaldehyde          | 100 | (dtbbpy)NiBr2 | 10 | Cs2CO3       | 10 | TFT     |  |  | 7.7  |
| pentafluorobenzaldehyde      | 100 | (dtbbpy)NiBr2 | 10 | Cs2CO3       | 10 | TFT     |  |  | 74.9 |
| p-Ac-benzaldehyde            | 100 | (dtbbpy)NiBr2 | 10 | Cs2CO3       | 10 | TFT     |  |  | 54.6 |
| 2-naphthaldehyde             | 100 | (dtbbpy)NiBr2 | 10 | Cs2CO3       | 10 | TFT     |  |  | 0.0  |
| o-Me-benzaldehyde            | 100 | (dtbbpy)NiBr2 | 10 | Cs2CO3       | 10 | TFT     |  |  | 45.6 |
| (Ir[dF(CF3)ppy]2(dtbbpy))PF6 | 10  | (dtbbpy)NiBr2 | 10 | Quinuclidine | 10 | TFT     |  |  | 0.0  |
| p-CF3-benzaldehyde           | 100 | (dtbbpy)NiBr2 | 10 | Quinuclidine | 10 | TFT     |  |  | 58.4 |
| p-CN-benzaldehyde            | 100 | (dtbbpy)NiBr2 | 10 | Quinuclidine | 10 | TFT     |  |  | 65.6 |
| p-NO2-benzaldehyde           | 100 | (dtbbpy)NiBr2 | 10 | Quinuclidine | 10 | TFT     |  |  | 3.5  |

|                                                                    |     |                           |    |                                 |    |      |  |  |      |
|--------------------------------------------------------------------|-----|---------------------------|----|---------------------------------|----|------|--|--|------|
| m-CHO-benzaldehyde                                                 | 100 | (dtbbpy)NiBr <sub>2</sub> | 10 | Quinuclidine                    | 10 | TFT  |  |  | 26.2 |
| 3,5-diCF <sub>3</sub> -benzaldehyde                                | 100 | (dtbbpy)NiBr <sub>2</sub> | 10 | Quinuclidine                    | 10 | TFT  |  |  | 67.5 |
| 3-py-carboxaldehyde                                                | 100 | (dtbbpy)NiBr <sub>2</sub> | 10 | Quinuclidine                    | 10 | TFT  |  |  | 25.6 |
| 4-py-carboxaldehyde                                                | 100 | (dtbbpy)NiBr <sub>2</sub> | 10 | Quinuclidine                    | 10 | TFT  |  |  | 50.2 |
| pentafluorobenzaldehyde                                            | 100 | (dtbbpy)NiBr <sub>2</sub> | 10 | Quinuclidine                    | 10 | TFT  |  |  | 13.5 |
| p-Ac-benzaldehyde                                                  | 100 | (dtbbpy)NiBr <sub>2</sub> | 10 | Quinuclidine                    | 10 | TFT  |  |  | 0.0  |
| 2-naphthaldehyde                                                   | 100 | (dtbbpy)NiBr <sub>2</sub> | 10 | Quinuclidine                    | 10 | TFT  |  |  | 0.0  |
| o-Me-benzaldehyde                                                  | 100 | (dtbbpy)NiBr <sub>2</sub> | 10 | Quinuclidine                    | 10 | TFT  |  |  | 16.2 |
| (Ir[dF(CF <sub>3</sub> )ppy] <sub>2</sub> (dtbbpy))PF <sub>6</sub> | 10  | (dtbbpy)NiBr <sub>2</sub> | 10 | Barton's base                   | 10 | TFT  |  |  | 0.0  |
| p-CF <sub>3</sub> -benzaldehyde                                    | 100 | (dtbbpy)NiBr <sub>2</sub> | 10 | Barton's base                   | 10 | TFT  |  |  | 0.0  |
| p-CN-benzaldehyde                                                  | 100 | (dtbbpy)NiBr <sub>2</sub> | 10 | Barton's base                   | 10 | TFT  |  |  | 0.0  |
| p-NO <sub>2</sub> -benzaldehyde                                    | 100 | (dtbbpy)NiBr <sub>2</sub> | 10 | Barton's base                   | 10 | TFT  |  |  | 0.0  |
| m-CHO-benzaldehyde                                                 | 100 | (dtbbpy)NiBr <sub>2</sub> | 10 | Barton's base                   | 10 | TFT  |  |  | 0.0  |
| 3,5-diCF <sub>3</sub> -benzaldehyde                                | 100 | (dtbbpy)NiBr <sub>2</sub> | 10 | Barton's base                   | 10 | TFT  |  |  | 0.0  |
| 3-py-carboxaldehyde                                                | 100 | (dtbbpy)NiBr <sub>2</sub> | 10 | Barton's base                   | 10 | TFT  |  |  | 0.0  |
| 4-py-carboxaldehyde                                                | 100 | (dtbbpy)NiBr <sub>2</sub> | 10 | Barton's base                   | 10 | TFT  |  |  | 0.0  |
| pentafluorobenzaldehyde                                            | 100 | (dtbbpy)NiBr <sub>2</sub> | 10 | Barton's base                   | 10 | TFT  |  |  | 0.0  |
| p-Ac-benzaldehyde                                                  | 100 | (dtbbpy)NiBr <sub>2</sub> | 10 | Barton's base                   | 10 | TFT  |  |  | 0.0  |
| 2-naphthaldehyde                                                   | 100 | (dtbbpy)NiBr <sub>2</sub> | 10 | Barton's base                   | 10 | TFT  |  |  | 0.0  |
| o-Me-benzaldehyde                                                  | 100 | (dtbbpy)NiBr <sub>2</sub> | 10 | Barton's base                   | 10 | TFT  |  |  | 0.0  |
| (Ir[dF(CF <sub>3</sub> )ppy] <sub>2</sub> (dtbbpy))PF <sub>6</sub> | 10  | (dtbbpy)NiBr <sub>2</sub> | 10 | K <sub>2</sub> HPO <sub>4</sub> | 10 | MeCN |  |  | 0.0  |
| p-CF <sub>3</sub> -benzaldehyde                                    | 100 | (dtbbpy)NiBr <sub>2</sub> | 10 | K <sub>2</sub> HPO <sub>4</sub> | 10 | MeCN |  |  | 40.6 |
| p-CN-benzaldehyde                                                  | 100 | (dtbbpy)NiBr <sub>2</sub> | 10 | K <sub>2</sub> HPO <sub>4</sub> | 10 | MeCN |  |  | 0.0  |
| p-NO <sub>2</sub> -benzaldehyde                                    | 100 | (dtbbpy)NiBr <sub>2</sub> | 10 | K <sub>2</sub> HPO <sub>4</sub> | 10 | MeCN |  |  | 0.0  |
| m-CHO-benzaldehyde                                                 | 100 | (dtbbpy)NiBr <sub>2</sub> | 10 | K <sub>2</sub> HPO <sub>4</sub> | 10 | MeCN |  |  | 42.2 |
| 3,5-diCF <sub>3</sub> -benzaldehyde                                | 100 | (dtbbpy)NiBr <sub>2</sub> | 10 | K <sub>2</sub> HPO <sub>4</sub> | 10 | MeCN |  |  | 0.0  |
| 3-py-carboxaldehyde                                                | 100 | (dtbbpy)NiBr <sub>2</sub> | 10 | K <sub>2</sub> HPO <sub>4</sub> | 10 | MeCN |  |  | 32.4 |
| 4-py-carboxaldehyde                                                | 100 | (dtbbpy)NiBr <sub>2</sub> | 10 | K <sub>2</sub> HPO <sub>4</sub> | 10 | MeCN |  |  | 44.8 |
| pentafluorobenzaldehyde                                            | 100 | (dtbbpy)NiBr <sub>2</sub> | 10 | K <sub>2</sub> HPO <sub>4</sub> | 10 | MeCN |  |  | 45.0 |
| p-Ac-benzaldehyde                                                  | 100 | (dtbbpy)NiBr <sub>2</sub> | 10 | K <sub>2</sub> HPO <sub>4</sub> | 10 | MeCN |  |  | 44.2 |
| 2-naphthaldehyde                                                   | 100 | (dtbbpy)NiBr <sub>2</sub> | 10 | K <sub>2</sub> HPO <sub>4</sub> | 10 | MeCN |  |  | 0.0  |
| o-Me-benzaldehyde                                                  | 100 | (dtbbpy)NiBr <sub>2</sub> | 10 | K <sub>2</sub> HPO <sub>4</sub> | 10 | MeCN |  |  | 13.1 |
| (Ir[dF(CF <sub>3</sub> )ppy] <sub>2</sub> (dtbbpy))PF <sub>6</sub> | 10  | (dtbbpy)NiBr <sub>2</sub> | 10 | Cs <sub>2</sub> CO <sub>3</sub> | 10 | MeCN |  |  | 0.0  |
| p-CF <sub>3</sub> -benzaldehyde                                    | 100 | (dtbbpy)NiBr <sub>2</sub> | 10 | Cs <sub>2</sub> CO <sub>3</sub> | 10 | MeCN |  |  | 13.7 |
| p-CN-benzaldehyde                                                  | 100 | (dtbbpy)NiBr <sub>2</sub> | 10 | Cs <sub>2</sub> CO <sub>3</sub> | 10 | MeCN |  |  | 16.2 |
| p-NO <sub>2</sub> -benzaldehyde                                    | 100 | (dtbbpy)NiBr <sub>2</sub> | 10 | Cs <sub>2</sub> CO <sub>3</sub> | 10 | MeCN |  |  | 0.0  |

|                              |     |                       |    |               |    |      |  |  |      |
|------------------------------|-----|-----------------------|----|---------------|----|------|--|--|------|
| m-CHO-benzaldehyde           | 100 | (dtbbpy)NiBr2         | 10 | Cs2CO3        | 10 | MeCN |  |  | 2.4  |
| 3,5-diCF3-benzaldehyde       | 100 | (dtbbpy)NiBr2         | 10 | Cs2CO3        | 10 | MeCN |  |  | 4.4  |
| 3-py-carboxaldehyde          | 100 | (dtbbpy)NiBr2         | 10 | Cs2CO3        | 10 | MeCN |  |  | 1.9  |
| 4-py-carboxaldehyde          | 100 | (dtbbpy)NiBr2         | 10 | Cs2CO3        | 10 | MeCN |  |  | 0.0  |
| pentafluorobenzaldehyde      | 100 | (dtbbpy)NiBr2         | 10 | Cs2CO3        | 10 | MeCN |  |  | 0.0  |
| p-Ac-benzaldehyde            | 100 | (dtbbpy)NiBr2         | 10 | Cs2CO3        | 10 | MeCN |  |  | 5.2  |
| 2-naphthaldehyde             | 100 | (dtbbpy)NiBr2         | 10 | Cs2CO3        | 10 | MeCN |  |  | 0.0  |
| o-Me-benzaldehyde            | 100 | (dtbbpy)NiBr2         | 10 | Cs2CO3        | 10 | MeCN |  |  | 0.0  |
| (Ir[dF(CF3)ppy]2(dtbbpy))PF6 | 10  | (dtbbpy)NiBr2         | 10 | Quinuclidine  | 10 | MeCN |  |  | 0.0  |
| p-CF3-benzaldehyde           | 100 | (dtbbpy)NiBr2         | 10 | Quinuclidine  | 10 | MeCN |  |  | 9.7  |
| p-CN-benzaldehyde            | 100 | (dtbbpy)NiBr2         | 10 | Quinuclidine  | 10 | MeCN |  |  | 0.0  |
| p-NO2-benzaldehyde           | 100 | (dtbbpy)NiBr2         | 10 | Quinuclidine  | 10 | MeCN |  |  | 0.0  |
| m-CHO-benzaldehyde           | 100 | (dtbbpy)NiBr2         | 10 | Quinuclidine  | 10 | MeCN |  |  | 1.7  |
| 3,5-diCF3-benzaldehyde       | 100 | (dtbbpy)NiBr2         | 10 | Quinuclidine  | 10 | MeCN |  |  | 5.8  |
| 3-py-carboxaldehyde          | 100 | (dtbbpy)NiBr2         | 10 | Quinuclidine  | 10 | MeCN |  |  | 0.0  |
| 4-py-carboxaldehyde          | 100 | (dtbbpy)NiBr2         | 10 | Quinuclidine  | 10 | MeCN |  |  | 0.0  |
| pentafluorobenzaldehyde      | 100 | (dtbbpy)NiBr2         | 10 | Quinuclidine  | 10 | MeCN |  |  | 3.6  |
| p-Ac-benzaldehyde            | 100 | (dtbbpy)NiBr2         | 10 | Quinuclidine  | 10 | MeCN |  |  | 0.0  |
| 2-naphthaldehyde             | 100 | (dtbbpy)NiBr2         | 10 | Quinuclidine  | 10 | MeCN |  |  | 0.0  |
| o-Me-benzaldehyde            | 100 | (dtbbpy)NiBr2         | 10 | Quinuclidine  | 10 | MeCN |  |  | 0.0  |
| (Ir[dF(CF3)ppy]2(dtbbpy))PF6 | 10  | (dtbbpy)NiBr2         | 10 | Barton's base | 10 | MeCN |  |  | 0.0  |
| p-CF3-benzaldehyde           | 100 | (dtbbpy)NiBr2         | 10 | Barton's base | 10 | MeCN |  |  | 0.0  |
| p-CN-benzaldehyde            | 100 | (dtbbpy)NiBr2         | 10 | Barton's base | 10 | MeCN |  |  | 0.0  |
| p-NO2-benzaldehyde           | 100 | (dtbbpy)NiBr2         | 10 | Barton's base | 10 | MeCN |  |  | 0.0  |
| m-CHO-benzaldehyde           | 100 | (dtbbpy)NiBr2         | 10 | Barton's base | 10 | MeCN |  |  | 0.0  |
| 3,5-diCF3-benzaldehyde       | 100 | (dtbbpy)NiBr2         | 10 | Barton's base | 10 | MeCN |  |  | 0.0  |
| 3-py-carboxaldehyde          | 100 | (dtbbpy)NiBr2         | 10 | Barton's base | 10 | MeCN |  |  | 0.0  |
| 4-py-carboxaldehyde          | 100 | (dtbbpy)NiBr2         | 10 | Barton's base | 10 | MeCN |  |  | 0.0  |
| pentafluorobenzaldehyde      | 100 | (dtbbpy)NiBr2         | 10 | Barton's base | 10 | MeCN |  |  | 2.9  |
| p-Ac-benzaldehyde            | 100 | (dtbbpy)NiBr2         | 10 | Barton's base | 10 | MeCN |  |  | 0.0  |
| 2-naphthaldehyde             | 100 | (dtbbpy)NiBr2         | 10 | Barton's base | 10 | MeCN |  |  | 0.0  |
| o-Me-benzaldehyde            | 100 | (dtbbpy)NiBr2         | 10 | Barton's base | 10 | MeCN |  |  | 0.0  |
| p-CN-benzaldehyde            | 50  | (dtbbpy)NiBr2         | 10 | K2HPO4        | 5  | TFT  |  |  | 9.7  |
| p-CN-benzaldehyde            | 100 | Ni(acac)2 + ttbterpy  | 10 | K2HPO4        | 5  | TFT  |  |  | 0.0  |
| p-CN-benzaldehyde            | 50  | NiBr2(DME) + ttbterpy | 10 | K2HPO4        | 5  | TFT  |  |  | 35.4 |

|                   |     |                          |    |        |    |     |  |  |      |
|-------------------|-----|--------------------------|----|--------|----|-----|--|--|------|
| p-CN-benzaldehyde | 100 | (dtbbpy)NiBr2            | 10 | K2HPO4 | 5  | TFT |  |  | 40.8 |
| p-CN-benzaldehyde | 50  | Ni(acac)2 +<br>ttbterpy  | 10 | K2HPO4 | 5  | TFT |  |  | 21.5 |
| p-CN-benzaldehyde | 100 | NiBr2(DME) +<br>ttbterpy | 10 | K2HPO4 | 5  | TFT |  |  | 59.7 |
| p-CN-benzaldehyde | 50  | (dtbbpy)NiBr2            | 10 | K3PO4  | 5  | TFT |  |  | 24.0 |
| p-CN-benzaldehyde | 100 | Ni(acac)2 +<br>ttbterpy  | 10 | K3PO4  | 5  | TFT |  |  | 0.0  |
| p-CN-benzaldehyde | 50  | NiBr2(DME) +<br>ttbterpy | 10 | K3PO4  | 5  | TFT |  |  | 45.2 |
| p-CN-benzaldehyde | 100 | (dtbbpy)NiBr2            | 10 | K3PO4  | 5  | TFT |  |  | 55.1 |
| p-CN-benzaldehyde | 50  | Ni(acac)2 +<br>ttbterpy  | 10 | K3PO4  | 5  | TFT |  |  | 0.0  |
| p-CN-benzaldehyde | 100 | NiBr2(DME) +<br>ttbterpy | 10 | K3PO4  | 5  | TFT |  |  | 37.6 |
| p-CN-benzaldehyde | 50  | (dtbbpy)NiBr2            | 10 | K2HPO4 | 10 | TFT |  |  | 21.4 |
| p-CN-benzaldehyde | 100 | Ni(acac)2 +<br>ttbterpy  | 10 | K2HPO4 | 10 | TFT |  |  | 0.0  |
| p-CN-benzaldehyde | 50  | NiBr2(DME) +<br>ttbterpy | 10 | K2HPO4 | 10 | TFT |  |  | 42.2 |
| p-CN-benzaldehyde | 100 | (dtbbpy)NiBr2            | 10 | K2HPO4 | 10 | TFT |  |  | 54.2 |
| p-CN-benzaldehyde | 50  | Ni(acac)2 +<br>ttbterpy  | 10 | K2HPO4 | 10 | TFT |  |  | 19.9 |
| p-CN-benzaldehyde | 100 | NiBr2(DME) +<br>ttbterpy | 10 | K2HPO4 | 10 | TFT |  |  | 83.3 |
| p-CN-benzaldehyde | 50  | (dtbbpy)NiBr2            | 10 | K3PO4  | 10 | TFT |  |  | 41.2 |
| p-CN-benzaldehyde | 100 | Ni(acac)2 +<br>ttbterpy  | 10 | K3PO4  | 10 | TFT |  |  | 0.0  |
| p-CN-benzaldehyde | 50  | NiBr2(DME) +<br>ttbterpy | 10 | K3PO4  | 10 | TFT |  |  | 42.2 |
| p-CN-benzaldehyde | 100 | (dtbbpy)NiBr2            | 10 | K3PO4  | 10 | TFT |  |  | 67.6 |
| p-CN-benzaldehyde | 50  | Ni(acac)2 +<br>ttbterpy  | 10 | K3PO4  | 10 | TFT |  |  | 0.0  |
| p-CN-benzaldehyde | 100 | NiBr2(DME) +<br>ttbterpy | 10 | K3PO4  | 10 | TFT |  |  | 93.4 |
| p-CN-benzaldehyde | 50  | (dtbbpy)NiBr2            | 20 | K2HPO4 | 5  | TFT |  |  | 24.8 |
| p-CN-benzaldehyde | 100 | Ni(acac)2 +<br>ttbterpy  | 20 | K2HPO4 | 5  | TFT |  |  | 0.0  |
| p-CN-benzaldehyde | 50  | NiBr2(DME) +<br>ttbterpy | 20 | K2HPO4 | 5  | TFT |  |  | 35.2 |
| p-CN-benzaldehyde | 100 | (dtbbpy)NiBr2            | 20 | K2HPO4 | 5  | TFT |  |  | 18.7 |
| p-CN-benzaldehyde | 50  | Ni(acac)2 +<br>ttbterpy  | 20 | K2HPO4 | 5  | TFT |  |  | 6.1  |
| p-CN-benzaldehyde | 100 | NiBr2(DME) +<br>ttbterpy | 20 | K2HPO4 | 5  | TFT |  |  | 64.2 |
| p-CN-benzaldehyde | 50  | (dtbbpy)NiBr2            | 20 | K3PO4  | 5  | TFT |  |  | 42.0 |
| p-CN-benzaldehyde | 100 | Ni(acac)2 +<br>ttbterpy  | 20 | K3PO4  | 5  | TFT |  |  | 0.0  |
| p-CN-benzaldehyde | 50  | NiBr2(DME) +<br>ttbterpy | 20 | K3PO4  | 5  | TFT |  |  | 40.5 |
| p-CN-benzaldehyde | 100 | (dtbbpy)NiBr2            | 20 | K3PO4  | 5  | TFT |  |  | 34.4 |

|                   |     |                                       |    |                                              |    |     |  |      |
|-------------------|-----|---------------------------------------|----|----------------------------------------------|----|-----|--|------|
| p-CN-benzaldehyde | 50  | Ni(acac) <sub>2</sub> +<br>ttbterpy   | 20 | K <sub>3</sub> PO <sub>4</sub>               | 5  | TFT |  | 0.0  |
| p-CN-benzaldehyde | 100 | NiBr <sub>2</sub> (DME) +<br>ttbterpy | 20 | K <sub>3</sub> PO <sub>4</sub>               | 5  | TFT |  | 68.8 |
| p-CN-benzaldehyde | 50  | (dtbbpy)NiBr <sub>2</sub>             | 20 | K <sub>2</sub> HPO <sub>4</sub>              | 10 | TFT |  | 0.0  |
| p-CN-benzaldehyde | 100 | Ni(acac) <sub>2</sub> +<br>ttbterpy   | 20 | K <sub>2</sub> HPO <sub>4</sub>              | 10 | TFT |  | 0.0  |
| p-CN-benzaldehyde | 50  | NiBr <sub>2</sub> (DME) +<br>ttbterpy | 20 | K <sub>2</sub> HPO <sub>4</sub>              | 10 | TFT |  | 0.0  |
| p-CN-benzaldehyde | 100 | (dtbbpy)NiBr <sub>2</sub>             | 20 | K <sub>2</sub> HPO <sub>4</sub>              | 10 | TFT |  | 49.7 |
| p-CN-benzaldehyde | 50  | Ni(acac) <sub>2</sub> +<br>ttbterpy   | 20 | K <sub>2</sub> HPO <sub>4</sub>              | 10 | TFT |  | 0.0  |
| p-CN-benzaldehyde | 100 | NiBr <sub>2</sub> (DME) +<br>ttbterpy | 20 | K <sub>2</sub> HPO <sub>4</sub>              | 10 | TFT |  | 76.3 |
| p-CN-benzaldehyde | 50  | (dtbbpy)NiBr <sub>2</sub>             | 20 | K <sub>3</sub> PO <sub>4</sub>               | 10 | TFT |  | 47.5 |
| p-CN-benzaldehyde | 100 | Ni(acac) <sub>2</sub> +<br>ttbterpy   | 20 | K <sub>3</sub> PO <sub>4</sub>               | 10 | TFT |  | 0.0  |
| p-CN-benzaldehyde | 50  | NiBr <sub>2</sub> (DME) +<br>ttbterpy | 20 | K <sub>3</sub> PO <sub>4</sub>               | 10 | TFT |  | 52.7 |
| p-CN-benzaldehyde | 100 | (dtbbpy)NiBr <sub>2</sub>             | 20 | K <sub>3</sub> PO <sub>4</sub>               | 10 | TFT |  | 41.9 |
| p-CN-benzaldehyde | 50  | Ni(acac) <sub>2</sub> +<br>ttbterpy   | 20 | K <sub>3</sub> PO <sub>4</sub>               | 10 | TFT |  | 0.0  |
| p-CN-benzaldehyde | 100 | NiBr <sub>2</sub> (DME) +<br>ttbterpy | 20 | K <sub>3</sub> PO <sub>4</sub>               | 10 | TFT |  | 87.0 |
| p-CN-benzaldehyde | 50  | (dtbbpy)NiBr <sub>2</sub>             | 10 | K <sub>2</sub> HPO <sub>4</sub><br>(slurry)  | 5  | TFT |  | 16.8 |
| p-CN-benzaldehyde | 100 | Ni(acac) <sub>2</sub> +<br>ttbterpy   | 10 | K <sub>2</sub> HPO <sub>4</sub><br>(slurry)  | 5  | TFT |  | 0.0  |
| p-CN-benzaldehyde | 50  | NiBr <sub>2</sub> (DME) +<br>ttbterpy | 10 | K <sub>2</sub> HPO <sub>4</sub><br>(slurry)  | 5  | TFT |  | 6.1  |
| p-CN-benzaldehyde | 100 | (dtbbpy)NiBr <sub>2</sub>             | 10 | K <sub>2</sub> HPO <sub>4</sub><br>(slurry)  | 5  | TFT |  | 46.4 |
| p-CN-benzaldehyde | 50  | Ni(acac) <sub>2</sub> +<br>ttbterpy   | 10 | K <sub>2</sub> HPO <sub>4</sub><br>(slurry)  | 5  | TFT |  | 11.9 |
| p-CN-benzaldehyde | 100 | NiBr <sub>2</sub> (DME) +<br>ttbterpy | 10 | K <sub>2</sub> HPO <sub>4</sub><br>(slurry)  | 5  | TFT |  | 51.1 |
| p-CN-benzaldehyde | 50  | (dtbbpy)NiBr <sub>2</sub>             | 10 | K <sub>2</sub> HPO <sub>4</sub><br>(lab ram) | 5  | TFT |  | 16.0 |
| p-CN-benzaldehyde | 100 | Ni(acac) <sub>2</sub> +<br>ttbterpy   | 10 | K <sub>2</sub> HPO <sub>4</sub><br>(lab ram) | 5  | TFT |  | 0.0  |
| p-CN-benzaldehyde | 50  | NiBr <sub>2</sub> (DME) +<br>ttbterpy | 10 | K <sub>2</sub> HPO <sub>4</sub><br>(lab ram) | 5  | TFT |  | 51.7 |
| p-CN-benzaldehyde | 100 | (dtbbpy)NiBr <sub>2</sub>             | 10 | K <sub>2</sub> HPO <sub>4</sub><br>(lab ram) | 5  | TFT |  | 0.0  |
| p-CN-benzaldehyde | 50  | Ni(acac) <sub>2</sub> +<br>ttbterpy   | 10 | K <sub>2</sub> HPO <sub>4</sub><br>(lab ram) | 5  | TFT |  | 27.4 |
| p-CN-benzaldehyde | 100 | NiBr <sub>2</sub> (DME) +<br>ttbterpy | 10 | K <sub>2</sub> HPO <sub>4</sub><br>(lab ram) | 5  | TFT |  | 49.4 |
| p-CN-benzaldehyde | 50  | (dtbbpy)NiBr <sub>2</sub>             | 10 | K <sub>2</sub> HPO <sub>4</sub><br>(slurry)  | 10 | TFT |  | 20.0 |
| p-CN-benzaldehyde | 100 | Ni(acac) <sub>2</sub> +<br>ttbterpy   | 10 | K <sub>2</sub> HPO <sub>4</sub><br>(slurry)  | 10 | TFT |  | 0.0  |
| p-CN-benzaldehyde | 50  | NiBr <sub>2</sub> (DME) +<br>ttbterpy | 10 | K <sub>2</sub> HPO <sub>4</sub><br>(slurry)  | 10 | TFT |  | 0.0  |

|                   |     |                                       |    |                                              |    |     |  |      |
|-------------------|-----|---------------------------------------|----|----------------------------------------------|----|-----|--|------|
| p-CN-benzaldehyde | 100 | (dtbbpy)NiBr <sub>2</sub>             | 10 | K <sub>2</sub> HPO <sub>4</sub><br>(slurry)  | 10 | TFT |  | 52.9 |
| p-CN-benzaldehyde | 50  | Ni(acac) <sub>2</sub> +<br>ttbterpy   | 10 | K <sub>2</sub> HPO <sub>4</sub><br>(slurry)  | 10 | TFT |  | 0.0  |
| p-CN-benzaldehyde | 100 | NiBr <sub>2</sub> (DME) +<br>ttbterpy | 10 | K <sub>2</sub> HPO <sub>4</sub><br>(slurry)  | 10 | TFT |  | 95.3 |
| p-CN-benzaldehyde | 50  | (dtbbpy)NiBr <sub>2</sub>             | 10 | K <sub>2</sub> HPO <sub>4</sub><br>(lab ram) | 10 | TFT |  | 31.6 |
| p-CN-benzaldehyde | 100 | Ni(acac) <sub>2</sub> +<br>ttbterpy   | 10 | K <sub>2</sub> HPO <sub>4</sub><br>(lab ram) | 10 | TFT |  | 5.3  |
| p-CN-benzaldehyde | 50  | NiBr <sub>2</sub> (DME) +<br>ttbterpy | 10 | K <sub>2</sub> HPO <sub>4</sub><br>(lab ram) | 10 | TFT |  | 61.4 |
| p-CN-benzaldehyde | 100 | (dtbbpy)NiBr <sub>2</sub>             | 10 | K <sub>2</sub> HPO <sub>4</sub><br>(lab ram) | 10 | TFT |  | 55.3 |
| p-CN-benzaldehyde | 50  | Ni(acac) <sub>2</sub> +<br>ttbterpy   | 10 | K <sub>2</sub> HPO <sub>4</sub><br>(lab ram) | 10 | TFT |  | 25.4 |
| p-CN-benzaldehyde | 100 | NiBr <sub>2</sub> (DME) +<br>ttbterpy | 10 | K <sub>2</sub> HPO <sub>4</sub><br>(lab ram) | 10 | TFT |  | 77.7 |
| p-CN-benzaldehyde | 50  | (dtbbpy)NiBr <sub>2</sub>             | 20 | K <sub>2</sub> HPO <sub>4</sub><br>(slurry)  | 5  | TFT |  | 20.7 |
| p-CN-benzaldehyde | 100 | Ni(acac) <sub>2</sub> +<br>ttbterpy   | 20 | K <sub>2</sub> HPO <sub>4</sub><br>(slurry)  | 5  | TFT |  | 0.0  |
| p-CN-benzaldehyde | 50  | NiBr <sub>2</sub> (DME) +<br>ttbterpy | 20 | K <sub>2</sub> HPO <sub>4</sub><br>(slurry)  | 5  | TFT |  | 27.8 |
| p-CN-benzaldehyde | 100 | (dtbbpy)NiBr <sub>2</sub>             | 20 | K <sub>2</sub> HPO <sub>4</sub><br>(slurry)  | 5  | TFT |  | 0.0  |
| p-CN-benzaldehyde | 50  | Ni(acac) <sub>2</sub> +<br>ttbterpy   | 20 | K <sub>2</sub> HPO <sub>4</sub><br>(slurry)  | 5  | TFT |  | 0.0  |
| p-CN-benzaldehyde | 100 | NiBr <sub>2</sub> (DME) +<br>ttbterpy | 20 | K <sub>2</sub> HPO <sub>4</sub><br>(slurry)  | 5  | TFT |  | 52.4 |
| p-CN-benzaldehyde | 50  | (dtbbpy)NiBr <sub>2</sub>             | 20 | K <sub>2</sub> HPO <sub>4</sub><br>(lab ram) | 5  | TFT |  | 23.8 |
| p-CN-benzaldehyde | 100 | Ni(acac) <sub>2</sub> +<br>ttbterpy   | 20 | K <sub>2</sub> HPO <sub>4</sub><br>(lab ram) | 5  | TFT |  | 0.0  |
| p-CN-benzaldehyde | 50  | NiBr <sub>2</sub> (DME) +<br>ttbterpy | 20 | K <sub>2</sub> HPO <sub>4</sub><br>(lab ram) | 5  | TFT |  | 63.8 |
| p-CN-benzaldehyde | 100 | (dtbbpy)NiBr <sub>2</sub>             | 20 | K <sub>2</sub> HPO <sub>4</sub><br>(lab ram) | 5  | TFT |  | 22.8 |
| p-CN-benzaldehyde | 50  | Ni(acac) <sub>2</sub> +<br>ttbterpy   | 20 | K <sub>2</sub> HPO <sub>4</sub><br>(lab ram) | 5  | TFT |  | 0.0  |
| p-CN-benzaldehyde | 100 | NiBr <sub>2</sub> (DME) +<br>ttbterpy | 20 | K <sub>2</sub> HPO <sub>4</sub><br>(lab ram) | 5  | TFT |  | 57.9 |
| p-CN-benzaldehyde | 50  | (dtbbpy)NiBr <sub>2</sub>             | 20 | K <sub>2</sub> HPO <sub>4</sub><br>(slurry)  | 10 | TFT |  | 0.0  |
| p-CN-benzaldehyde | 100 | Ni(acac) <sub>2</sub> +<br>ttbterpy   | 20 | K <sub>2</sub> HPO <sub>4</sub><br>(slurry)  | 10 | TFT |  | 0.0  |
| p-CN-benzaldehyde | 50  | NiBr <sub>2</sub> (DME) +<br>ttbterpy | 20 | K <sub>2</sub> HPO <sub>4</sub><br>(slurry)  | 10 | TFT |  | 40.3 |
| p-CN-benzaldehyde | 100 | (dtbbpy)NiBr <sub>2</sub>             | 20 | K <sub>2</sub> HPO <sub>4</sub><br>(slurry)  | 10 | TFT |  | 54.6 |
| p-CN-benzaldehyde | 50  | Ni(acac) <sub>2</sub> +<br>ttbterpy   | 20 | K <sub>2</sub> HPO <sub>4</sub><br>(slurry)  | 10 | TFT |  | 0.0  |
| p-CN-benzaldehyde | 100 | NiBr <sub>2</sub> (DME) +<br>ttbterpy | 20 | K <sub>2</sub> HPO <sub>4</sub><br>(slurry)  | 10 | TFT |  | 62.3 |



|                   |     |                                       |    |                                              |    |         |  |      |
|-------------------|-----|---------------------------------------|----|----------------------------------------------|----|---------|--|------|
| p-CN-benzaldehyde | 50  | (dtbbpy)NiBr <sub>2</sub>             | 20 | K <sub>2</sub> HPO <sub>4</sub><br>(lab ram) | 10 | TFT     |  | 40.0 |
| p-CN-benzaldehyde | 100 | Ni(acac) <sub>2</sub> +<br>ttbterpy   | 20 | K <sub>2</sub> HPO <sub>4</sub><br>(lab ram) | 10 | TFT     |  | 0.0  |
| p-CN-benzaldehyde | 50  | NiBr <sub>2</sub> (DME) +<br>ttbterpy | 20 | K <sub>2</sub> HPO <sub>4</sub><br>(lab ram) | 10 | TFT     |  | 42.4 |
| p-CN-benzaldehyde | 100 | (dtbbpy)NiBr <sub>2</sub>             | 20 | K <sub>2</sub> HPO <sub>4</sub><br>(lab ram) | 10 | TFT     |  | 44.8 |
| p-CN-benzaldehyde | 50  | Ni(acac) <sub>2</sub> +<br>ttbterpy   | 20 | K <sub>2</sub> HPO <sub>4</sub><br>(lab ram) | 10 | TFT     |  | 0.0  |
| p-CN-benzaldehyde | 100 | NiBr <sub>2</sub> (DME) +<br>ttbterpy | 20 | K <sub>2</sub> HPO <sub>4</sub><br>(lab ram) | 10 | TFT     |  | 70.4 |
| p-CN-benzaldehyde | 100 | (dtbbpy)NiBr <sub>2</sub>             | 20 | DABCO                                        | 10 | TFT     |  | 73.4 |
| p-CN-benzaldehyde | 100 | (dtbbpy)NiBr <sub>2</sub>             | 20 | Quinuclidine                                 | 10 | TFT     |  | 21.9 |
| p-CN-benzaldehyde | 100 | (dtbbpy)NiBr <sub>2</sub>             | 20 | NMI                                          | 10 | TFT     |  | 0.0  |
| p-CN-benzaldehyde | 100 | (dtbbpy)NiBr <sub>2</sub>             | 20 | TBD                                          | 10 | TFT     |  | 0.0  |
| p-CN-benzaldehyde | 100 | (dtbbpy)NiBr <sub>2</sub>             | 20 | NaBHT                                        | 10 | TFT     |  | 0.0  |
| p-CN-benzaldehyde | 100 | (dtbbpy)NiBr <sub>2</sub>             | 20 | CsF                                          | 10 | TFT     |  | 75.9 |
| p-CN-benzaldehyde | 100 | (dtbbpy)NiBr <sub>2</sub>             | 20 | KOPiv                                        | 10 | TFT     |  | 5.3  |
| p-CN-benzaldehyde | 100 | (dtbbpy)NiBr <sub>2</sub>             | 20 | DIPEA                                        | 10 | TFT     |  | 37.6 |
| p-CN-benzaldehyde | 100 | (dtbbpy)NiBr <sub>2</sub>             | 20 | P2Et                                         | 10 | TFT     |  | 3.5  |
| p-CN-benzaldehyde | 100 | (dtbbpy)NiBr <sub>2</sub>             | 20 | DBU                                          | 10 | TFT     |  | 0.0  |
| p-CN-benzaldehyde | 100 | (dtbbpy)NiBr <sub>2</sub>             | 20 | 2,6-lutidine                                 | 10 | TFT     |  | 24.9 |
| p-CN-benzaldehyde | 100 | (dtbbpy)NiBr <sub>2</sub>             | 20 | iPr <sub>2</sub> NH                          | 10 | TFT     |  | 71.7 |
| p-CN-benzaldehyde | 100 | (dtbbpy)NiBr <sub>2</sub>             | 20 | DABCO                                        | 10 | MeCN    |  | 5.3  |
| p-CN-benzaldehyde | 100 | (dtbbpy)NiBr <sub>2</sub>             | 20 | Quinuclidine                                 | 10 | MeCN    |  | 0.0  |
| p-CN-benzaldehyde | 100 | (dtbbpy)NiBr <sub>2</sub>             | 20 | NMI                                          | 10 | MeCN    |  | 14.3 |
| p-CN-benzaldehyde | 100 | (dtbbpy)NiBr <sub>2</sub>             | 20 | TBD                                          | 10 | MeCN    |  | 0.0  |
| p-CN-benzaldehyde | 100 | (dtbbpy)NiBr <sub>2</sub>             | 20 | NaBHT                                        | 10 | MeCN    |  | 0.0  |
| p-CN-benzaldehyde | 100 | (dtbbpy)NiBr <sub>2</sub>             | 20 | CsF                                          | 10 | MeCN    |  | 26.4 |
| p-CN-benzaldehyde | 100 | (dtbbpy)NiBr <sub>2</sub>             | 20 | KOPiv                                        | 10 | MeCN    |  | 1.6  |
| p-CN-benzaldehyde | 100 | (dtbbpy)NiBr <sub>2</sub>             | 20 | DIPEA                                        | 10 | MeCN    |  | 4.8  |
| p-CN-benzaldehyde | 100 | (dtbbpy)NiBr <sub>2</sub>             | 20 | P2Et                                         | 10 | MeCN    |  | 3.6  |
| p-CN-benzaldehyde | 100 | (dtbbpy)NiBr <sub>2</sub>             | 20 | DBU                                          | 10 | MeCN    |  | 0.0  |
| p-CN-benzaldehyde | 100 | (dtbbpy)NiBr <sub>2</sub>             | 20 | 2,6-lutidine                                 | 10 | MeCN    |  | 17.9 |
| p-CN-benzaldehyde | 100 | (dtbbpy)NiBr <sub>2</sub>             | 20 | iPr <sub>2</sub> NH                          | 10 | MeCN    |  | 28.2 |
| p-CN-benzaldehyde | 100 | (dtbbpy)NiBr <sub>2</sub>             | 20 | DABCO                                        | 10 | acetone |  | 0.0  |
| p-CN-benzaldehyde | 100 | (dtbbpy)NiBr <sub>2</sub>             | 20 | Quinuclidine                                 | 10 | acetone |  | 20.7 |
| p-CN-benzaldehyde | 100 | (dtbbpy)NiBr <sub>2</sub>             | 20 | NMI                                          | 10 | acetone |  | 0.0  |
| p-CN-benzaldehyde | 100 | (dtbbpy)NiBr <sub>2</sub>             | 20 | TBD                                          | 10 | acetone |  | 0.0  |
| p-CN-benzaldehyde | 100 | (dtbbpy)NiBr <sub>2</sub>             | 20 | NaBHT                                        | 10 | acetone |  | 0.0  |
| p-CN-benzaldehyde | 100 | (dtbbpy)NiBr <sub>2</sub>             | 20 | CsF                                          | 10 | acetone |  | 42.6 |
| p-CN-benzaldehyde | 100 | (dtbbpy)NiBr <sub>2</sub>             | 20 | KOPiv                                        | 10 | acetone |  | 3.5  |
| p-CN-benzaldehyde | 100 | (dtbbpy)NiBr <sub>2</sub>             | 20 | DIPEA                                        | 10 | acetone |  | 22.2 |
| p-CN-benzaldehyde | 100 | (dtbbpy)NiBr <sub>2</sub>             | 20 | P2Et                                         | 10 | acetone |  | 0.0  |

|                   |     |                       |    |              |    |           |  |  |      |
|-------------------|-----|-----------------------|----|--------------|----|-----------|--|--|------|
| p-CN-benzaldehyde | 100 | (dtbbpy)NiBr2         | 20 | DBU          | 10 | acetone   |  |  | 0.0  |
| p-CN-benzaldehyde | 100 | (dtbbpy)NiBr2         | 20 | 2,6-lutidine | 10 | acetone   |  |  | 0.0  |
| p-CN-benzaldehyde | 100 | (dtbbpy)NiBr2         | 20 | iPr2NH       | 10 | acetone   |  |  | 61.5 |
| p-CN-benzaldehyde | 100 | (dtbbpy)NiBr2         | 20 | DABCO        | 10 | t-amyl OH |  |  | 0.0  |
| p-CN-benzaldehyde | 100 | (dtbbpy)NiBr2         | 20 | Quinuclidine | 10 | t-amyl OH |  |  | 0.0  |
| p-CN-benzaldehyde | 100 | (dtbbpy)NiBr2         | 20 | NMI          | 10 | t-amyl OH |  |  | 0.0  |
| p-CN-benzaldehyde | 100 | (dtbbpy)NiBr2         | 20 | TBD          | 10 | t-amyl OH |  |  | 0.0  |
| p-CN-benzaldehyde | 100 | (dtbbpy)NiBr2         | 20 | NaBHT        | 10 | t-amyl OH |  |  | 0.0  |
| p-CN-benzaldehyde | 100 | (dtbbpy)NiBr2         | 20 | CsF          | 10 | t-amyl OH |  |  | 0.0  |
| p-CN-benzaldehyde | 100 | (dtbbpy)NiBr2         | 20 | KOPiv        | 10 | t-amyl OH |  |  | 3.0  |
| p-CN-benzaldehyde | 100 | (dtbbpy)NiBr2         | 20 | DIPEA        | 10 | t-amyl OH |  |  | 6.5  |
| p-CN-benzaldehyde | 100 | (dtbbpy)NiBr2         | 20 | P2Et         | 10 | t-amyl OH |  |  | 0.0  |
| p-CN-benzaldehyde | 100 | (dtbbpy)NiBr2         | 20 | DBU          | 10 | t-amyl OH |  |  | 0.0  |
| p-CN-benzaldehyde | 100 | (dtbbpy)NiBr2         | 20 | 2,6-lutidine | 10 | t-amyl OH |  |  | 0.0  |
| p-CN-benzaldehyde | 100 | (dtbbpy)NiBr2         | 20 | iPr2NH       | 10 | t-amyl OH |  |  | 34.1 |
| p-CN-benzaldehyde | 100 | NiBr2(DME) + ttbterpy | 10 | DABCO        | 10 | TFT       |  |  | 6.0  |
| p-CN-benzaldehyde | 100 | NiBr2(DME) + ttbterpy | 10 | Quinuclidine | 10 | TFT       |  |  | 63.8 |
| p-CN-benzaldehyde | 100 | NiBr2(DME) + ttbterpy | 10 | NMI          | 10 | TFT       |  |  | 0.0  |
| p-CN-benzaldehyde | 100 | NiBr2(DME) + ttbterpy | 10 | TBD          | 10 | TFT       |  |  | 0.0  |
| p-CN-benzaldehyde | 100 | NiBr2(DME) + ttbterpy | 10 | NaBHT        | 10 | TFT       |  |  | 0.0  |
| p-CN-benzaldehyde | 100 | NiBr2(DME) + ttbterpy | 10 | CsF          | 10 | TFT       |  |  | 88.9 |
| p-CN-benzaldehyde | 100 | NiBr2(DME) + ttbterpy | 10 | KOPiv        | 10 | TFT       |  |  | 51.4 |
| p-CN-benzaldehyde | 100 | NiBr2(DME) + ttbterpy | 10 | DIPEA        | 10 | TFT       |  |  | 50.7 |
| p-CN-benzaldehyde | 100 | NiBr2(DME) + ttbterpy | 10 | P2Et         | 10 | TFT       |  |  | 0.0  |
| p-CN-benzaldehyde | 100 | NiBr2(DME) + ttbterpy | 10 | DBU          | 10 | TFT       |  |  | 0.0  |
| p-CN-benzaldehyde | 100 | NiBr2(DME) + ttbterpy | 10 | 2,6-lutidine | 10 | TFT       |  |  | 16.9 |
| p-CN-benzaldehyde | 100 | NiBr2(DME) + ttbterpy | 10 | iPr2NH       | 10 | TFT       |  |  | 64.2 |
| p-CN-benzaldehyde | 100 | NiBr2(DME) + ttbterpy | 10 | DABCO        | 10 | MeCN      |  |  | 4.8  |
| p-CN-benzaldehyde | 100 | NiBr2(DME) +          | 10 | Quinuclidine | 10 | MeCN      |  |  | 5.4  |

|                   |     |                                       |    |                     |    |              |  |  |      |
|-------------------|-----|---------------------------------------|----|---------------------|----|--------------|--|--|------|
|                   |     | ttbterpy                              |    |                     |    |              |  |  |      |
| p-CN-benzaldehyde | 100 | NiBr <sub>2</sub> (DME) +<br>ttbterpy | 10 | NMI                 | 10 | MeCN         |  |  | 11.6 |
| p-CN-benzaldehyde | 100 | NiBr <sub>2</sub> (DME) +<br>ttbterpy | 10 | TBD                 | 10 | MeCN         |  |  | 0.0  |
| p-CN-benzaldehyde | 100 | NiBr <sub>2</sub> (DME) +<br>ttbterpy | 10 | NaBHT               | 10 | MeCN         |  |  | 0.0  |
| p-CN-benzaldehyde | 100 | NiBr <sub>2</sub> (DME) +<br>ttbterpy | 10 | CsF                 | 10 | MeCN         |  |  | 17.8 |
| p-CN-benzaldehyde | 100 | NiBr <sub>2</sub> (DME) +<br>ttbterpy | 10 | KOPiv               | 10 | MeCN         |  |  | 15.6 |
| p-CN-benzaldehyde | 100 | NiBr <sub>2</sub> (DME) +<br>ttbterpy | 10 | DIPEA               | 10 | MeCN         |  |  | 30.0 |
| p-CN-benzaldehyde | 100 | NiBr <sub>2</sub> (DME) +<br>ttbterpy | 10 | P2Et                | 10 | MeCN         |  |  | 0.0  |
| p-CN-benzaldehyde | 100 | NiBr <sub>2</sub> (DME) +<br>ttbterpy | 10 | DBU                 | 10 | MeCN         |  |  | 0.0  |
| p-CN-benzaldehyde | 100 | NiBr <sub>2</sub> (DME) +<br>ttbterpy | 10 | 2,6-lutidine        | 10 | MeCN         |  |  | 4.7  |
| p-CN-benzaldehyde | 100 | NiBr <sub>2</sub> (DME) +<br>ttbterpy | 10 | iPr <sub>2</sub> NH | 10 | MeCN         |  |  | 14.1 |
| p-CN-benzaldehyde | 100 | NiBr <sub>2</sub> (DME) +<br>ttbterpy | 10 | DABCO               | 10 | acetone      |  |  | 25.6 |
| p-CN-benzaldehyde | 100 | NiBr <sub>2</sub> (DME) +<br>ttbterpy | 10 | Quinuclidine        | 10 | acetone      |  |  | 0.0  |
| p-CN-benzaldehyde | 100 | NiBr <sub>2</sub> (DME) +<br>ttbterpy | 10 | NMI                 | 10 | acetone      |  |  | 12.8 |
| p-CN-benzaldehyde | 100 | NiBr <sub>2</sub> (DME) +<br>ttbterpy | 10 | TBD                 | 10 | acetone      |  |  | 1.4  |
| p-CN-benzaldehyde | 100 | NiBr <sub>2</sub> (DME) +<br>ttbterpy | 10 | NaBHT               | 10 | acetone      |  |  | 0.0  |
| p-CN-benzaldehyde | 100 | NiBr <sub>2</sub> (DME) +<br>ttbterpy | 10 | CsF                 | 10 | acetone      |  |  | 12.5 |
| p-CN-benzaldehyde | 100 | NiBr <sub>2</sub> (DME) +<br>ttbterpy | 10 | KOPiv               | 10 | acetone      |  |  | 21.2 |
| p-CN-benzaldehyde | 100 | NiBr <sub>2</sub> (DME) +<br>ttbterpy | 10 | DIPEA               | 10 | acetone      |  |  | 65.3 |
| p-CN-benzaldehyde | 100 | NiBr <sub>2</sub> (DME) +<br>ttbterpy | 10 | P2Et                | 10 | acetone      |  |  | 0.0  |
| p-CN-benzaldehyde | 100 | NiBr <sub>2</sub> (DME) +<br>ttbterpy | 10 | DBU                 | 10 | acetone      |  |  | 0.0  |
| p-CN-benzaldehyde | 100 | NiBr <sub>2</sub> (DME) +<br>ttbterpy | 10 | 2,6-lutidine        | 10 | acetone      |  |  | 5.4  |
| p-CN-benzaldehyde | 100 | NiBr <sub>2</sub> (DME) +<br>ttbterpy | 10 | iPr <sub>2</sub> NH | 10 | acetone      |  |  | 16.2 |
| p-CN-benzaldehyde | 100 | NiBr <sub>2</sub> (DME) +<br>ttbterpy | 10 | DABCO               | 10 | t-amyl<br>OH |  |  | 35.0 |
| p-CN-benzaldehyde | 100 | NiBr <sub>2</sub> (DME) +<br>ttbterpy | 10 | Quinuclidine        | 10 | t-amyl<br>OH |  |  | 0.0  |
| p-CN-benzaldehyde | 100 | NiBr <sub>2</sub> (DME) +<br>ttbterpy | 10 | NMI                 | 10 | t-amyl<br>OH |  |  | 14.8 |
| p-CN-benzaldehyde | 100 | NiBr <sub>2</sub> (DME) +<br>ttbterpy | 10 | TBD                 | 10 | t-amyl<br>OH |  |  | 0.0  |
| p-CN-benzaldehyde | 100 | NiBr <sub>2</sub> (DME) +             | 10 | NaBHT               | 10 | t-amyl       |  |  | 0.0  |

|                   |     |                                       |    |                                |    |              |                  |    |       |
|-------------------|-----|---------------------------------------|----|--------------------------------|----|--------------|------------------|----|-------|
|                   |     | ttbterpy                              |    |                                |    | OH           |                  |    |       |
| p-CN-benzaldehyde | 100 | NiBr <sub>2</sub> (DME) +<br>ttbterpy | 10 | CsF                            | 10 | t-amyl<br>OH |                  |    | 0.0   |
| p-CN-benzaldehyde | 100 | NiBr <sub>2</sub> (DME) +<br>ttbterpy | 10 | KOPiv                          | 10 | t-amyl<br>OH |                  |    | 4.3   |
| p-CN-benzaldehyde | 100 | NiBr <sub>2</sub> (DME) +<br>ttbterpy | 10 | DIPEA                          | 10 | t-amyl<br>OH |                  |    | 21.7  |
| p-CN-benzaldehyde | 100 | NiBr <sub>2</sub> (DME) +<br>ttbterpy | 10 | P2Et                           | 10 | t-amyl<br>OH |                  |    | 0.0   |
| p-CN-benzaldehyde | 100 | NiBr <sub>2</sub> (DME) +<br>ttbterpy | 10 | DBU                            | 10 | t-amyl<br>OH |                  |    | 0.0   |
| p-CN-benzaldehyde | 100 | NiBr <sub>2</sub> (DME) +<br>ttbterpy | 10 | 2,6-lutidine                   | 10 | t-amyl<br>OH |                  |    | 11.7  |
| p-CN-benzaldehyde | 100 | NiBr <sub>2</sub> (DME) +<br>ttbterpy | 10 | iPr <sub>2</sub> NH            | 10 | t-amyl<br>OH |                  |    | 24.3  |
| p-CN-benzaldehyde | 100 | NiBr <sub>2</sub> (DME) +<br>ttbterpy | 10 | K <sub>3</sub> PO <sub>4</sub> | 10 | TFT          | DCE              | 50 | 0.0   |
| p-CN-benzaldehyde | 100 | NiBr <sub>2</sub> (DME) +<br>ttbterpy | 10 | K <sub>3</sub> PO <sub>4</sub> | 10 | TFT          | acetone          | 50 | 0.0   |
| p-CN-benzaldehyde | 100 | NiBr <sub>2</sub> (DME) +<br>ttbterpy | 10 | K <sub>3</sub> PO <sub>4</sub> | 10 | TFT          | t-amyl<br>OH     | 50 | 60.5  |
| p-CN-benzaldehyde | 100 | NiBr <sub>2</sub> (DME) +<br>ttbterpy | 10 | K <sub>3</sub> PO <sub>4</sub> | 10 | TFT          | TFE              | 50 | 0.0   |
| p-CN-benzaldehyde | 100 | NiBr <sub>2</sub> (DME) +<br>ttbterpy | 10 | K <sub>3</sub> PO <sub>4</sub> | 10 | TFT          | DMSO             | 50 | 0.0   |
| p-CN-benzaldehyde | 100 | NiBr <sub>2</sub> (DME) +<br>ttbterpy | 10 | K <sub>3</sub> PO <sub>4</sub> | 10 | TFT          | DCM              | 50 | 29.6  |
| p-CN-benzaldehyde | 100 | NiBr <sub>2</sub> (DME) +<br>ttbterpy | 10 | K <sub>3</sub> PO <sub>4</sub> | 10 | TFT          | DMF              | 50 | 0.0   |
| p-CN-benzaldehyde | 100 | NiBr <sub>2</sub> (DME) +<br>ttbterpy | 10 | K <sub>3</sub> PO <sub>4</sub> | 10 | TFT          | MeCN             | 50 | 88.4  |
| p-CN-benzaldehyde | 100 | NiBr <sub>2</sub> (DME) +<br>ttbterpy | 10 | K <sub>3</sub> PO <sub>4</sub> | 10 | TFT          | TFT              | 50 | 100.0 |
| p-CN-benzaldehyde | 100 | NiBr <sub>2</sub> (DME) +<br>ttbterpy | 10 | K <sub>3</sub> PO <sub>4</sub> | 10 | TFT          | DMA              | 50 | 0.0   |
| p-CN-benzaldehyde | 100 | NiBr <sub>2</sub> (DME) +<br>ttbterpy | 10 | K <sub>3</sub> PO <sub>4</sub> | 10 | TFT          | 2,6-<br>lutidine | 50 | 3.3   |
| p-CN-benzaldehyde | 100 | NiBr <sub>2</sub> (DME) +<br>ttbterpy | 10 | K <sub>3</sub> PO <sub>4</sub> | 10 | TFT          | water            | 50 | 0.0   |
| p-CN-benzaldehyde | 100 | NiBr <sub>2</sub> (DME) +<br>ttbterpy | 10 | K <sub>3</sub> PO <sub>4</sub> | 10 | TFT          | DCE              | 25 | 51.1  |
| p-CN-benzaldehyde | 100 | NiBr <sub>2</sub> (DME) +<br>ttbterpy | 10 | K <sub>3</sub> PO <sub>4</sub> | 10 | TFT          | acetone          | 25 | 100.0 |
| p-CN-benzaldehyde | 100 | NiBr <sub>2</sub> (DME) +<br>ttbterpy | 10 | K <sub>3</sub> PO <sub>4</sub> | 10 | TFT          | t-amyl<br>OH     | 25 | 77.0  |
| p-CN-benzaldehyde | 100 | NiBr <sub>2</sub> (DME) +<br>ttbterpy | 10 | K <sub>3</sub> PO <sub>4</sub> | 10 | TFT          | TFE              | 25 | 22.2  |
| p-CN-benzaldehyde | 100 | NiBr <sub>2</sub> (DME) +<br>ttbterpy | 10 | K <sub>3</sub> PO <sub>4</sub> | 10 | TFT          | DMSO             | 25 | 0.0   |
| p-CN-benzaldehyde | 100 | NiBr <sub>2</sub> (DME) +<br>ttbterpy | 10 | K <sub>3</sub> PO <sub>4</sub> | 10 | TFT          | DCM              | 25 | 24.1  |
| p-CN-benzaldehyde | 100 | NiBr <sub>2</sub> (DME) +<br>ttbterpy | 10 | K <sub>3</sub> PO <sub>4</sub> | 10 | TFT          | DMF              | 25 | 0.0   |
| p-CN-benzaldehyde | 100 | NiBr <sub>2</sub> (DME) +<br>ttbterpy | 10 | K <sub>3</sub> PO <sub>4</sub> | 10 | TFT          | MeCN             | 25 | 76.9  |

|                   |     |                                       |    |                                |    |     |                  |      |       |
|-------------------|-----|---------------------------------------|----|--------------------------------|----|-----|------------------|------|-------|
|                   |     | ttbterpy                              |    |                                |    |     |                  |      |       |
| p-CN-benzaldehyde | 100 | NiBr <sub>2</sub> (DME) +<br>ttbterpy | 10 | K <sub>3</sub> PO <sub>4</sub> | 10 | TFT | TFT              | 25   | 85.8  |
| p-CN-benzaldehyde | 100 | NiBr <sub>2</sub> (DME) +<br>ttbterpy | 10 | K <sub>3</sub> PO <sub>4</sub> | 10 | TFT | DMA              | 25   | 0.0   |
| p-CN-benzaldehyde | 100 | NiBr <sub>2</sub> (DME) +<br>ttbterpy | 10 | K <sub>3</sub> PO <sub>4</sub> | 10 | TFT | 2,6-<br>lutidine | 25   | 3.6   |
| p-CN-benzaldehyde | 100 | NiBr <sub>2</sub> (DME) +<br>ttbterpy | 10 | K <sub>3</sub> PO <sub>4</sub> | 10 | TFT | water            | 25   | 0.0   |
| p-CN-benzaldehyde | 100 | NiBr <sub>2</sub> (DME) +<br>ttbterpy | 10 | K <sub>3</sub> PO <sub>4</sub> | 10 | TFT | DCE              | 12.5 | 0.0   |
| p-CN-benzaldehyde | 100 | NiBr <sub>2</sub> (DME) +<br>ttbterpy | 10 | K <sub>3</sub> PO <sub>4</sub> | 10 | TFT | acetone          | 12.5 | 100.0 |
| p-CN-benzaldehyde | 100 | NiBr <sub>2</sub> (DME) +<br>ttbterpy | 10 | K <sub>3</sub> PO <sub>4</sub> | 10 | TFT | t-amyl<br>OH     | 12.5 | 0.0   |
| p-CN-benzaldehyde | 100 | NiBr <sub>2</sub> (DME) +<br>ttbterpy | 10 | K <sub>3</sub> PO <sub>4</sub> | 10 | TFT | TFE              | 12.5 | 0.0   |
| p-CN-benzaldehyde | 100 | NiBr <sub>2</sub> (DME) +<br>ttbterpy | 10 | K <sub>3</sub> PO <sub>4</sub> | 10 | TFT | DMSO             | 12.5 | 0.0   |
| p-CN-benzaldehyde | 100 | NiBr <sub>2</sub> (DME) +<br>ttbterpy | 10 | K <sub>3</sub> PO <sub>4</sub> | 10 | TFT | DCM              | 12.5 | 40.1  |
| p-CN-benzaldehyde | 100 | NiBr <sub>2</sub> (DME) +<br>ttbterpy | 10 | K <sub>3</sub> PO <sub>4</sub> | 10 | TFT | DMF              | 12.5 | 0.0   |
| p-CN-benzaldehyde | 100 | NiBr <sub>2</sub> (DME) +<br>ttbterpy | 10 | K <sub>3</sub> PO <sub>4</sub> | 10 | TFT | MeCN             | 12.5 | 1.4   |
| p-CN-benzaldehyde | 100 | NiBr <sub>2</sub> (DME) +<br>ttbterpy | 10 | K <sub>3</sub> PO <sub>4</sub> | 10 | TFT | TFT              | 12.5 | 100.0 |
| p-CN-benzaldehyde | 100 | NiBr <sub>2</sub> (DME) +<br>ttbterpy | 10 | K <sub>3</sub> PO <sub>4</sub> | 10 | TFT | DMA              | 12.5 | 0.0   |
| p-CN-benzaldehyde | 100 | NiBr <sub>2</sub> (DME) +<br>ttbterpy | 10 | K <sub>3</sub> PO <sub>4</sub> | 10 | TFT | 2,6-<br>lutidine | 12.5 | 11.7  |
| p-CN-benzaldehyde | 100 | NiBr <sub>2</sub> (DME) +<br>ttbterpy | 10 | K <sub>3</sub> PO <sub>4</sub> | 10 | TFT | water            | 12.5 | 0.0   |
| p-CN-benzaldehyde | 100 | NiBr <sub>2</sub> (DME) +<br>ttbterpy | 10 | K <sub>3</sub> PO <sub>4</sub> | 10 | TFT | DCE              | 6.25 | 5.8   |
| p-CN-benzaldehyde | 100 | NiBr <sub>2</sub> (DME) +<br>ttbterpy | 10 | K <sub>3</sub> PO <sub>4</sub> | 10 | TFT | acetone          | 6.25 | 98.3  |
| p-CN-benzaldehyde | 100 | NiBr <sub>2</sub> (DME) +<br>ttbterpy | 10 | K <sub>3</sub> PO <sub>4</sub> | 10 | TFT | t-amyl<br>OH     | 6.25 | 83.8  |
| p-CN-benzaldehyde | 100 | NiBr <sub>2</sub> (DME) +<br>ttbterpy | 10 | K <sub>3</sub> PO <sub>4</sub> | 10 | TFT | TFE              | 6.25 | 1.5   |
| p-CN-benzaldehyde | 100 | NiBr <sub>2</sub> (DME) +<br>ttbterpy | 10 | K <sub>3</sub> PO <sub>4</sub> | 10 | TFT | DMSO             | 6.25 | 0.0   |
| p-CN-benzaldehyde | 100 | NiBr <sub>2</sub> (DME) +<br>ttbterpy | 10 | K <sub>3</sub> PO <sub>4</sub> | 10 | TFT | DCM              | 6.25 | 52.4  |
| p-CN-benzaldehyde | 100 | NiBr <sub>2</sub> (DME) +<br>ttbterpy | 10 | K <sub>3</sub> PO <sub>4</sub> | 10 | TFT | DMF              | 6.25 | 0.0   |
| p-CN-benzaldehyde | 100 | NiBr <sub>2</sub> (DME) +<br>ttbterpy | 10 | K <sub>3</sub> PO <sub>4</sub> | 10 | TFT | MeCN             | 6.25 | 53.3  |
| p-CN-benzaldehyde | 100 | NiBr <sub>2</sub> (DME) +<br>ttbterpy | 10 | K <sub>3</sub> PO <sub>4</sub> | 10 | TFT | TFT              | 6.25 | 0.0   |
| p-CN-benzaldehyde | 100 | NiBr <sub>2</sub> (DME) +<br>ttbterpy | 10 | K <sub>3</sub> PO <sub>4</sub> | 10 | TFT | DMA              | 6.25 | 0.0   |
| p-CN-benzaldehyde | 100 | NiBr <sub>2</sub> (DME) +<br>ttbterpy | 10 | K <sub>3</sub> PO <sub>4</sub> | 10 | TFT | 2,6-             | 6.25 | 0.0   |

|                   |     |                                       |    |                                |    |     |                  |      |      |
|-------------------|-----|---------------------------------------|----|--------------------------------|----|-----|------------------|------|------|
|                   |     | ttbterpy                              |    |                                |    |     | lutidine         |      |      |
| p-CN-benzaldehyde | 100 | NiBr <sub>2</sub> (DME) +<br>ttbterpy | 10 | K <sub>3</sub> PO <sub>4</sub> | 10 | TFT | water            | 6.25 | 1.8  |
| p-CN-benzaldehyde | 100 | (dtbbpy)NiBr <sub>2</sub>             | 10 | K <sub>3</sub> PO <sub>4</sub> | 10 | TFT | DCE              | 50   | 68.6 |
| p-CN-benzaldehyde | 100 | (dtbbpy)NiBr <sub>2</sub>             | 10 | K <sub>3</sub> PO <sub>4</sub> | 10 | TFT | acetone          | 50   | 2.9  |
| p-CN-benzaldehyde | 100 | (dtbbpy)NiBr <sub>2</sub>             | 10 | K <sub>3</sub> PO <sub>4</sub> | 10 | TFT | t-amyl<br>OH     | 50   | 0.0  |
| p-CN-benzaldehyde | 100 | (dtbbpy)NiBr <sub>2</sub>             | 10 | K <sub>3</sub> PO <sub>4</sub> | 10 | TFT | TFE              | 50   | 7.7  |
| p-CN-benzaldehyde | 100 | (dtbbpy)NiBr <sub>2</sub>             | 10 | K <sub>3</sub> PO <sub>4</sub> | 10 | TFT | DMSO             | 50   | 0.0  |
| p-CN-benzaldehyde | 100 | (dtbbpy)NiBr <sub>2</sub>             | 10 | K <sub>3</sub> PO <sub>4</sub> | 10 | TFT | DCM              | 50   | 66.2 |
| p-CN-benzaldehyde | 100 | (dtbbpy)NiBr <sub>2</sub>             | 10 | K <sub>3</sub> PO <sub>4</sub> | 10 | TFT | DMF              | 50   | 0.0  |
| p-CN-benzaldehyde | 100 | (dtbbpy)NiBr <sub>2</sub>             | 10 | K <sub>3</sub> PO <sub>4</sub> | 10 | TFT | MeCN             | 50   | 42.4 |
| p-CN-benzaldehyde | 100 | (dtbbpy)NiBr <sub>2</sub>             | 10 | K <sub>3</sub> PO <sub>4</sub> | 10 | TFT | TFT              | 50   | 75.8 |
| p-CN-benzaldehyde | 100 | (dtbbpy)NiBr <sub>2</sub>             | 10 | K <sub>3</sub> PO <sub>4</sub> | 10 | TFT | DMA              | 50   | 0.0  |
| p-CN-benzaldehyde | 100 | (dtbbpy)NiBr <sub>2</sub>             | 10 | K <sub>3</sub> PO <sub>4</sub> | 10 | TFT | 2,6-<br>lutidine | 50   | 0.0  |
| p-CN-benzaldehyde | 100 | (dtbbpy)NiBr <sub>2</sub>             | 10 | K <sub>3</sub> PO <sub>4</sub> | 10 | TFT | water            | 50   | 2.9  |
| p-CN-benzaldehyde | 100 | (dtbbpy)NiBr <sub>2</sub>             | 10 | K <sub>3</sub> PO <sub>4</sub> | 10 | TFT | DCE              | 25   | 0.0  |
| p-CN-benzaldehyde | 100 | (dtbbpy)NiBr <sub>2</sub>             | 10 | K <sub>3</sub> PO <sub>4</sub> | 10 | TFT | acetone          | 25   | 0.0  |
| p-CN-benzaldehyde | 100 | (dtbbpy)NiBr <sub>2</sub>             | 10 | K <sub>3</sub> PO <sub>4</sub> | 10 | TFT | t-amyl<br>OH     | 25   | 0.0  |
| p-CN-benzaldehyde | 100 | (dtbbpy)NiBr <sub>2</sub>             | 10 | K <sub>3</sub> PO <sub>4</sub> | 10 | TFT | TFE              | 25   | 5.7  |
| p-CN-benzaldehyde | 100 | (dtbbpy)NiBr <sub>2</sub>             | 10 | K <sub>3</sub> PO <sub>4</sub> | 10 | TFT | DMSO             | 25   | 0.0  |
| p-CN-benzaldehyde | 100 | (dtbbpy)NiBr <sub>2</sub>             | 10 | K <sub>3</sub> PO <sub>4</sub> | 10 | TFT | DCM              | 25   | 57.5 |
| p-CN-benzaldehyde | 100 | (dtbbpy)NiBr <sub>2</sub>             | 10 | K <sub>3</sub> PO <sub>4</sub> | 10 | TFT | DMF              | 25   | 0.0  |
| p-CN-benzaldehyde | 100 | (dtbbpy)NiBr <sub>2</sub>             | 10 | K <sub>3</sub> PO <sub>4</sub> | 10 | TFT | MeCN             | 25   | 46.3 |
| p-CN-benzaldehyde | 100 | (dtbbpy)NiBr <sub>2</sub>             | 10 | K <sub>3</sub> PO <sub>4</sub> | 10 | TFT | TFT              | 25   | 61.1 |
| p-CN-benzaldehyde | 100 | (dtbbpy)NiBr <sub>2</sub>             | 10 | K <sub>3</sub> PO <sub>4</sub> | 10 | TFT | DMA              | 25   | 0.0  |
| p-CN-benzaldehyde | 100 | (dtbbpy)NiBr <sub>2</sub>             | 10 | K <sub>3</sub> PO <sub>4</sub> | 10 | TFT | 2,6-<br>lutidine | 25   | 15.9 |
| p-CN-benzaldehyde | 100 | (dtbbpy)NiBr <sub>2</sub>             | 10 | K <sub>3</sub> PO <sub>4</sub> | 10 | TFT | water            | 25   | 2.2  |
| p-CN-benzaldehyde | 100 | (dtbbpy)NiBr <sub>2</sub>             | 10 | K <sub>3</sub> PO <sub>4</sub> | 10 | TFT | DCE              | 12.5 | 25.6 |
| p-CN-benzaldehyde | 100 | (dtbbpy)NiBr <sub>2</sub>             | 10 | K <sub>3</sub> PO <sub>4</sub> | 10 | TFT | acetone          | 12.5 | 0.0  |
| p-CN-benzaldehyde | 100 | (dtbbpy)NiBr <sub>2</sub>             | 10 | K <sub>3</sub> PO <sub>4</sub> | 10 | TFT | t-amyl<br>OH     | 12.5 | 39.1 |
| p-CN-benzaldehyde | 100 | (dtbbpy)NiBr <sub>2</sub>             | 10 | K <sub>3</sub> PO <sub>4</sub> | 10 | TFT | TFE              | 12.5 | 0.0  |
| p-CN-benzaldehyde | 100 | (dtbbpy)NiBr <sub>2</sub>             | 10 | K <sub>3</sub> PO <sub>4</sub> | 10 | TFT | DMSO             | 12.5 | 0.0  |
| p-CN-benzaldehyde | 100 | (dtbbpy)NiBr <sub>2</sub>             | 10 | K <sub>3</sub> PO <sub>4</sub> | 10 | TFT | DCM              | 12.5 | 63.8 |
| p-CN-benzaldehyde | 100 | (dtbbpy)NiBr <sub>2</sub>             | 10 | K <sub>3</sub> PO <sub>4</sub> | 10 | TFT | DMF              | 12.5 | 0.0  |
| p-CN-benzaldehyde | 100 | (dtbbpy)NiBr <sub>2</sub>             | 10 | K <sub>3</sub> PO <sub>4</sub> | 10 | TFT | MeCN             | 12.5 | 39.4 |
| p-CN-benzaldehyde | 100 | (dtbbpy)NiBr <sub>2</sub>             | 10 | K <sub>3</sub> PO <sub>4</sub> | 10 | TFT | TFT              | 12.5 | 59.0 |
| p-CN-benzaldehyde | 100 | (dtbbpy)NiBr <sub>2</sub>             | 10 | K <sub>3</sub> PO <sub>4</sub> | 10 | TFT | DMA              | 12.5 | 0.0  |
| p-CN-benzaldehyde | 100 | (dtbbpy)NiBr <sub>2</sub>             | 10 | K <sub>3</sub> PO <sub>4</sub> | 10 | TFT | 2,6-<br>lutidine | 12.5 | 31.0 |
| p-CN-benzaldehyde | 100 | (dtbbpy)NiBr <sub>2</sub>             | 10 | K <sub>3</sub> PO <sub>4</sub> | 10 | TFT | water            | 12.5 | 3.3  |
| p-CN-benzaldehyde | 100 | (dtbbpy)NiBr <sub>2</sub>             | 10 | K <sub>3</sub> PO <sub>4</sub> | 10 | TFT | DCE              | 6.25 | 72.2 |

|                   |     |                          |    |        |    |     |              |      |       |
|-------------------|-----|--------------------------|----|--------|----|-----|--------------|------|-------|
| p-CN-benzaldehyde | 100 | (dtbbpy)NiBr2            | 10 | K3PO4  | 10 | TFT | acetone      | 6.25 | 7.4   |
| p-CN-benzaldehyde | 100 | (dtbbpy)NiBr2            | 10 | K3PO4  | 10 | TFT | t-amyl OH    | 6.25 | 0.0   |
| p-CN-benzaldehyde | 100 | (dtbbpy)NiBr2            | 10 | K3PO4  | 10 | TFT | TFE          | 6.25 | 0.0   |
| p-CN-benzaldehyde | 100 | (dtbbpy)NiBr2            | 10 | K3PO4  | 10 | TFT | DMSO         | 6.25 | 0.0   |
| p-CN-benzaldehyde | 100 | (dtbbpy)NiBr2            | 10 | K3PO4  | 10 | TFT | DCM          | 6.25 | 74.4  |
| p-CN-benzaldehyde | 100 | (dtbbpy)NiBr2            | 10 | K3PO4  | 10 | TFT | DMF          | 6.25 | 0.0   |
| p-CN-benzaldehyde | 100 | (dtbbpy)NiBr2            | 10 | K3PO4  | 10 | TFT | MeCN         | 6.25 | 8.8   |
| p-CN-benzaldehyde | 100 | (dtbbpy)NiBr2            | 10 | K3PO4  | 10 | TFT | TFT          | 6.25 | 9.4   |
| p-CN-benzaldehyde | 100 | (dtbbpy)NiBr2            | 10 | K3PO4  | 10 | TFT | DMA          | 6.25 | 0.0   |
| p-CN-benzaldehyde | 100 | (dtbbpy)NiBr2            | 10 | K3PO4  | 10 | TFT | 2,6-lutidine | 6.25 | 42.3  |
| p-CN-benzaldehyde | 100 | (dtbbpy)NiBr2            | 10 | K3PO4  | 10 | TFT | water        | 6.25 | 3.6   |
| 4-CN-benzaldehyde | 50  | dtbbpy + NiBr2(DME)      | 10 | K2HPO4 | 10 | TFT |              |      | 35.2  |
| 4-CN-benzaldehyde | 50  | diOMe bpy + NiBr2(DME)   | 10 | K2HPO4 | 10 | TFT |              |      | 25.4  |
| 4-CN-benzaldehyde | 50  | diMe bpy + NiBr2(DME)    | 10 | K2HPO4 | 10 | TFT |              |      | 27.1  |
| 4-CN-benzaldehyde | 50  | diMe Phen + NiBr2(DME)   | 10 | K2HPO4 | 10 | TFT |              |      | 22.7  |
| 4-CN-benzaldehyde | 50  | diOMe phen + NiBr2(DME)  | 10 | K2HPO4 | 10 | TFT |              |      | 29.0  |
| 4-CN-benzaldehyde | 50  | bphen + NiBr2(DME)       | 10 | K2HPO4 | 10 | TFT |              |      | 36.1  |
| 4-CN-benzaldehyde | 50  | ttbterpy + NiBr2(DME)    | 10 | K2HPO4 | 10 | TFT |              |      | 100.0 |
| 4-CN-benzaldehyde | 50  | BPyCamCN + NiBr2(DME)    | 10 | K2HPO4 | 10 | TFT |              |      | 28.0  |
| 4-CN-benzaldehyde | 50  | Me bpp + NiBr2(DME)      | 10 | K2HPO4 | 10 | TFT |              |      | 9.8   |
| 4-CN-benzaldehyde | 50  | PyCamCN + NiBr2(DME)     | 10 | K2HPO4 | 10 | TFT |              |      | 25.1  |
| 4-CN-benzaldehyde | 50  | BnBiox + NiBr2(DME)      | 10 | K2HPO4 | 10 | TFT |              |      | 21.5  |
| 4-CN-benzaldehyde | 50  | IndenoBOX + NiBr2(DME)   | 10 | K2HPO4 | 10 | TFT |              |      | 21.1  |
| 4-CN-benzaldehyde | 50  | dtbbpy + Ni(cod)(DQ)     | 10 | K2HPO4 | 10 | TFT |              |      | 59.9  |
| 4-CN-benzaldehyde | 50  | diOMe bpy + Ni(cod)(DQ)  | 10 | K2HPO4 | 10 | TFT |              |      | 30.1  |
| 4-CN-benzaldehyde | 50  | diMe bpy + Ni(cod)(DQ)   | 10 | K2HPO4 | 10 | TFT |              |      | 24.0  |
| 4-CN-benzaldehyde | 50  | diMe Phen + Ni(cod)(DQ)  | 10 | K2HPO4 | 10 | TFT |              |      | 21.2  |
| 4-CN-benzaldehyde | 50  | diOMe phen + Ni(cod)(DQ) | 10 | K2HPO4 | 10 | TFT |              |      | 31.4  |
| 4-CN-benzaldehyde | 50  | bphen + Ni(cod)(DQ)      | 10 | K2HPO4 | 10 | TFT |              |      | 24.1  |
| 4-CN-benzaldehyde | 50  | ttbterpy + Ni(cod)(DQ)   | 10 | K2HPO4 | 10 | TFT |              |      | 0.0   |
| 4-CN-benzaldehyde | 50  | BPyCamCN +               | 10 | K2HPO4 | 10 | TFT |              |      | 10.4  |

|                   |    |                         |    |        |    |     |  |  |      |
|-------------------|----|-------------------------|----|--------|----|-----|--|--|------|
|                   |    | Ni(cod)(DQ)             |    |        |    |     |  |  |      |
| 4-CN-benzaldehyde | 50 | Me bpp + Ni(cod)(DQ)    | 10 | K2HPO4 | 10 | TFT |  |  | 22.4 |
| 4-CN-benzaldehyde | 50 | PyCamCN + Ni(cod)(DQ)   | 10 | K2HPO4 | 10 | TFT |  |  | 10.1 |
| 4-CN-benzaldehyde | 50 | BnBiox + Ni(cod)(DQ)    | 10 | K2HPO4 | 10 | TFT |  |  | 16.7 |
| 4-CN-benzaldehyde | 50 | IndenoBOX + Ni(cod)(DQ) | 10 | K2HPO4 | 10 | TFT |  |  | 10.3 |
| 4-CN-benzaldehyde | 50 | dtbbpy + Ni(acac)2      | 10 | K2HPO4 | 10 | TFT |  |  | 40.3 |
| 4-CN-benzaldehyde | 50 | diOMe bpy + Ni(acac)2   | 10 | K2HPO4 | 10 | TFT |  |  | 29.1 |
| 4-CN-benzaldehyde | 50 | diMe bpy + Ni(acac)2    | 10 | K2HPO4 | 10 | TFT |  |  | 27.3 |
| 4-CN-benzaldehyde | 50 | diMe Phen + Ni(acac)2   | 10 | K2HPO4 | 10 | TFT |  |  | 75.7 |
| 4-CN-benzaldehyde | 50 | diOMe phen + Ni(acac)2  | 10 | K2HPO4 | 10 | TFT |  |  | 57.9 |
| 4-CN-benzaldehyde | 50 | bphen + Ni(acac)2       | 10 | K2HPO4 | 10 | TFT |  |  | 77.9 |
| 4-CN-benzaldehyde | 50 | ttbterpy + Ni(acac)2    | 10 | K2HPO4 | 10 | TFT |  |  | 90.0 |
| 4-CN-benzaldehyde | 50 | BPyCamCN + Ni(acac)2    | 10 | K2HPO4 | 10 | TFT |  |  | 14.7 |
| 4-CN-benzaldehyde | 50 | Me bpp + Ni(acac)2      | 10 | K2HPO4 | 10 | TFT |  |  | 35.7 |
| 4-CN-benzaldehyde | 50 | PyCamCN + Ni(acac)2     | 10 | K2HPO4 | 10 | TFT |  |  | 16.3 |
| 4-CN-benzaldehyde | 50 | BnBiox + Ni(acac)2      | 10 | K2HPO4 | 10 | TFT |  |  | 22.7 |
| 4-CN-benzaldehyde | 50 | IndenoBOX + Ni(acac)2   | 10 | K2HPO4 | 10 | TFT |  |  | 12.8 |
| 4-CN-benzaldehyde | 50 | dtbbpy + NiCl2-6H2O     | 10 | K2HPO4 | 10 | TFT |  |  | 38.5 |
| 4-CN-benzaldehyde | 50 | diOMe bpy + NiCl2-6H2O  | 10 | K2HPO4 | 10 | TFT |  |  | 8.7  |
| 4-CN-benzaldehyde | 50 | diMe bpy + NiCl2-6H2O   | 10 | K2HPO4 | 10 | TFT |  |  | 20.8 |
| 4-CN-benzaldehyde | 50 | diMe Phen + NiCl2-6H2O  | 10 | K2HPO4 | 10 | TFT |  |  | 0.0  |
| 4-CN-benzaldehyde | 50 | diOMe phen + NiCl2-6H2O | 10 | K2HPO4 | 10 | TFT |  |  | 5.4  |
| 4-CN-benzaldehyde | 50 | bphen + NiCl2-6H2O      | 10 | K2HPO4 | 10 | TFT |  |  | 20.9 |
| 4-CN-benzaldehyde | 50 | ttbterpy + NiCl2-6H2O   | 10 | K2HPO4 | 10 | TFT |  |  | 85.8 |
| 4-CN-benzaldehyde | 50 | BPyCamCN + NiCl2-6H2O   | 10 | K2HPO4 | 10 | TFT |  |  | 14.1 |
| 4-CN-benzaldehyde | 50 | Me bpp + NiCl2-6H2O     | 10 | K2HPO4 | 10 | TFT |  |  | 8.3  |
| 4-CN-benzaldehyde | 50 | PyCamCN + NiCl2-6H2O    | 10 | K2HPO4 | 10 | TFT |  |  | 0.0  |
| 4-CN-benzaldehyde | 50 | BnBiox +                | 10 | K2HPO4 | 10 | TFT |  |  | 20.2 |



|                         |    |                                                  |    |                                 |    |     |  |  |      |
|-------------------------|----|--------------------------------------------------|----|---------------------------------|----|-----|--|--|------|
|                         |    | NiCl <sub>2</sub> ·6H <sub>2</sub> O             |    |                                 |    |     |  |  |      |
| 4-CN-benzaldehyde       | 50 | IndenoBOX + NiCl <sub>2</sub> ·6H <sub>2</sub> O | 10 | K <sub>2</sub> HPO <sub>4</sub> | 10 | TFT |  |  | 18.0 |
| pentafluorobenzaldehyde | 50 | dtbbpy + NiBr <sub>2</sub> (DME)                 | 10 | Cs <sub>2</sub> CO <sub>3</sub> | 10 | TFT |  |  | 46.6 |
| pentafluorobenzaldehyde | 50 | diOMe bpy + NiBr <sub>2</sub> (DME)              | 10 | Cs <sub>2</sub> CO <sub>3</sub> | 10 | TFT |  |  | 0.0  |
| pentafluorobenzaldehyde | 50 | diMe bpy + NiBr <sub>2</sub> (DME)               | 10 | Cs <sub>2</sub> CO <sub>3</sub> | 10 | TFT |  |  | 6.0  |
| pentafluorobenzaldehyde | 50 | diMe Phen + NiBr <sub>2</sub> (DME)              | 10 | Cs <sub>2</sub> CO <sub>3</sub> | 10 | TFT |  |  | 5.1  |
| pentafluorobenzaldehyde | 50 | diOMe phen + NiBr <sub>2</sub> (DME)             | 10 | Cs <sub>2</sub> CO <sub>3</sub> | 10 | TFT |  |  | 0.0  |
| pentafluorobenzaldehyde | 50 | bphen + NiBr <sub>2</sub> (DME)                  | 10 | Cs <sub>2</sub> CO <sub>3</sub> | 10 | TFT |  |  | 27.2 |
| pentafluorobenzaldehyde | 50 | ttbterpy + NiBr <sub>2</sub> (DME)               | 10 | Cs <sub>2</sub> CO <sub>3</sub> | 10 | TFT |  |  | 55.7 |
| pentafluorobenzaldehyde | 50 | BPyCamCN + NiBr <sub>2</sub> (DME)               | 10 | Cs <sub>2</sub> CO <sub>3</sub> | 10 | TFT |  |  | 0.0  |
| pentafluorobenzaldehyde | 50 | Me bpp + NiBr <sub>2</sub> (DME)                 | 10 | Cs <sub>2</sub> CO <sub>3</sub> | 10 | TFT |  |  | 8.2  |
| pentafluorobenzaldehyde | 50 | PyCamCN + NiBr <sub>2</sub> (DME)                | 10 | Cs <sub>2</sub> CO <sub>3</sub> | 10 | TFT |  |  | 0.0  |
| pentafluorobenzaldehyde | 50 | BnBiox + NiBr <sub>2</sub> (DME)                 | 10 | Cs <sub>2</sub> CO <sub>3</sub> | 10 | TFT |  |  | 0.0  |
| pentafluorobenzaldehyde | 50 | IndenoBOX + NiBr <sub>2</sub> (DME)              | 10 | Cs <sub>2</sub> CO <sub>3</sub> | 10 | TFT |  |  | 0.0  |
| pentafluorobenzaldehyde | 50 | dtbbpy + Ni(cod)(DQ)                             | 10 | Cs <sub>2</sub> CO <sub>3</sub> | 10 | TFT |  |  | 49.8 |
| pentafluorobenzaldehyde | 50 | diOMe bpy + Ni(cod)(DQ)                          | 10 | Cs <sub>2</sub> CO <sub>3</sub> | 10 | TFT |  |  | 28.5 |
| pentafluorobenzaldehyde | 50 | diMe bpy + Ni(cod)(DQ)                           | 10 | Cs <sub>2</sub> CO <sub>3</sub> | 10 | TFT |  |  | 25.1 |
| pentafluorobenzaldehyde | 50 | diMe Phen + Ni(cod)(DQ)                          | 10 | Cs <sub>2</sub> CO <sub>3</sub> | 10 | TFT |  |  | 26.2 |
| pentafluorobenzaldehyde | 50 | diOMe phen + Ni(cod)(DQ)                         | 10 | Cs <sub>2</sub> CO <sub>3</sub> | 10 | TFT |  |  | 15.8 |
| pentafluorobenzaldehyde | 50 | bphen + Ni(cod)(DQ)                              | 10 | Cs <sub>2</sub> CO <sub>3</sub> | 10 | TFT |  |  | 49.7 |
| pentafluorobenzaldehyde | 50 | ttbterpy + Ni(cod)(DQ)                           | 10 | Cs <sub>2</sub> CO <sub>3</sub> | 10 | TFT |  |  | 51.9 |
| pentafluorobenzaldehyde | 50 | BPyCamCN + Ni(cod)(DQ)                           | 10 | Cs <sub>2</sub> CO <sub>3</sub> | 10 | TFT |  |  | 0.0  |
| pentafluorobenzaldehyde | 50 | Me bpp + Ni(cod)(DQ)                             | 10 | Cs <sub>2</sub> CO <sub>3</sub> | 10 | TFT |  |  | 15.3 |
| pentafluorobenzaldehyde | 50 | PyCamCN + Ni(cod)(DQ)                            | 10 | Cs <sub>2</sub> CO <sub>3</sub> | 10 | TFT |  |  | 5.3  |
| pentafluorobenzaldehyde | 50 | BnBiox + Ni(cod)(DQ)                             | 10 | Cs <sub>2</sub> CO <sub>3</sub> | 10 | TFT |  |  | 0.0  |
| pentafluorobenzaldehyde | 50 | IndenoBOX + Ni(cod)(DQ)                          | 10 | Cs <sub>2</sub> CO <sub>3</sub> | 10 | TFT |  |  | 0.0  |
| pentafluorobenzaldehyde | 50 | dtbbpy + Ni(acac) <sub>2</sub>                   | 10 | Cs <sub>2</sub> CO <sub>3</sub> | 10 | TFT |  |  | 52.3 |
| pentafluorobenzaldehyde | 50 | diOMe bpy +                                      | 10 | Cs <sub>2</sub> CO <sub>3</sub> | 10 | TFT |  |  | 48.1 |

|                         |    |                                                   |    |                                 |    |     |  |  |      |
|-------------------------|----|---------------------------------------------------|----|---------------------------------|----|-----|--|--|------|
|                         |    | Ni(acac) <sub>2</sub>                             |    |                                 |    |     |  |  |      |
| pentafluorobenzaldehyde | 50 | diMe bpy + Ni(acac) <sub>2</sub>                  | 10 | Cs <sub>2</sub> CO <sub>3</sub> | 10 | TFT |  |  | 43.4 |
| pentafluorobenzaldehyde | 50 | diMe Phen + Ni(acac) <sub>2</sub>                 | 10 | Cs <sub>2</sub> CO <sub>3</sub> | 10 | TFT |  |  | 36.8 |
| pentafluorobenzaldehyde | 50 | diOMe phen + Ni(acac) <sub>2</sub>                | 10 | Cs <sub>2</sub> CO <sub>3</sub> | 10 | TFT |  |  | 31.9 |
| pentafluorobenzaldehyde | 50 | bphen + Ni(acac) <sub>2</sub>                     | 10 | Cs <sub>2</sub> CO <sub>3</sub> | 10 | TFT |  |  | 0.0  |
| pentafluorobenzaldehyde | 50 | ttbterpy + Ni(acac) <sub>2</sub>                  | 10 | Cs <sub>2</sub> CO <sub>3</sub> | 10 | TFT |  |  | 0.0  |
| pentafluorobenzaldehyde | 50 | BPyCamCN + Ni(acac) <sub>2</sub>                  | 10 | Cs <sub>2</sub> CO <sub>3</sub> | 10 | TFT |  |  | 0.0  |
| pentafluorobenzaldehyde | 50 | Me bpp + Ni(acac) <sub>2</sub>                    | 10 | Cs <sub>2</sub> CO <sub>3</sub> | 10 | TFT |  |  | 0.0  |
| pentafluorobenzaldehyde | 50 | PyCamCN + Ni(acac) <sub>2</sub>                   | 10 | Cs <sub>2</sub> CO <sub>3</sub> | 10 | TFT |  |  | 0.0  |
| pentafluorobenzaldehyde | 50 | BnBiox + Ni(acac) <sub>2</sub>                    | 10 | Cs <sub>2</sub> CO <sub>3</sub> | 10 | TFT |  |  | 0.0  |
| pentafluorobenzaldehyde | 50 | IndenoBOX + Ni(acac) <sub>2</sub>                 | 10 | Cs <sub>2</sub> CO <sub>3</sub> | 10 | TFT |  |  | 8.1  |
| pentafluorobenzaldehyde | 50 | dtbbpy + NiCl <sub>2</sub> ·6H <sub>2</sub> O     | 10 | Cs <sub>2</sub> CO <sub>3</sub> | 10 | TFT |  |  | 62.3 |
| pentafluorobenzaldehyde | 50 | diOMe bpy + NiCl <sub>2</sub> ·6H <sub>2</sub> O  | 10 | Cs <sub>2</sub> CO <sub>3</sub> | 10 | TFT |  |  | 14.1 |
| pentafluorobenzaldehyde | 50 | diMe bpy + NiCl <sub>2</sub> ·6H <sub>2</sub> O   | 10 | Cs <sub>2</sub> CO <sub>3</sub> | 10 | TFT |  |  | 16.4 |
| pentafluorobenzaldehyde | 50 | diMe Phen + NiCl <sub>2</sub> ·6H <sub>2</sub> O  | 10 | Cs <sub>2</sub> CO <sub>3</sub> | 10 | TFT |  |  | 34.4 |
| pentafluorobenzaldehyde | 50 | diOMe phen + NiCl <sub>2</sub> ·6H <sub>2</sub> O | 10 | Cs <sub>2</sub> CO <sub>3</sub> | 10 | TFT |  |  | 21.2 |
| pentafluorobenzaldehyde | 50 | bphen + NiCl <sub>2</sub> ·6H <sub>2</sub> O      | 10 | Cs <sub>2</sub> CO <sub>3</sub> | 10 | TFT |  |  | 39.7 |
| pentafluorobenzaldehyde | 50 | ttbterpy + NiCl <sub>2</sub> ·6H <sub>2</sub> O   | 10 | Cs <sub>2</sub> CO <sub>3</sub> | 10 | TFT |  |  | 21.0 |
| pentafluorobenzaldehyde | 50 | BPyCamCN + NiCl <sub>2</sub> ·6H <sub>2</sub> O   | 10 | Cs <sub>2</sub> CO <sub>3</sub> | 10 | TFT |  |  | 0.0  |
| pentafluorobenzaldehyde | 50 | Me bpp + NiCl <sub>2</sub> ·6H <sub>2</sub> O     | 10 | Cs <sub>2</sub> CO <sub>3</sub> | 10 | TFT |  |  | 0.0  |
| pentafluorobenzaldehyde | 50 | PyCamCN + NiCl <sub>2</sub> ·6H <sub>2</sub> O    | 10 | Cs <sub>2</sub> CO <sub>3</sub> | 10 | TFT |  |  | 0.0  |
| pentafluorobenzaldehyde | 50 | BnBiox + NiCl <sub>2</sub> ·6H <sub>2</sub> O     | 10 | Cs <sub>2</sub> CO <sub>3</sub> | 10 | TFT |  |  | 0.0  |
| pentafluorobenzaldehyde | 50 | IndenoBOX + NiCl <sub>2</sub> ·6H <sub>2</sub> O  | 10 | Cs <sub>2</sub> CO <sub>3</sub> | 10 | TFT |  |  | 0.0  |

## IX. Mass Table for Parallel Oxetane Arylation

| Row | Column | Expected | Observed | Ion                    |
|-----|--------|----------|----------|------------------------|
| A   | 1      | 306.1    | 306.2    | [M-tBu+H] <sup>+</sup> |
| A   | 2      | 249.1    | 249.1    | [M+H] <sup>+</sup>     |
| A   | 3      | -        | N/A      | -                      |
| A   | 4      | 261.2    | 261.3    | [M+H] <sup>+</sup>     |
| A   | 5      |          | N/A      | -                      |
| A   | 6      | 252.1    | 252.1    | [M+H] <sup>+</sup>     |
| B   | 1      | -        | N/A      | -                      |
| B   | 2      | 233.1    | 233.1    | [M+H] <sup>+</sup>     |
| B   | 3      | -        | N/A      | -                      |
| B   | 4      | -        | N/A      | -                      |
| B   | 5      | 263.1    | 263.0    | [M+H] <sup>+</sup>     |
| B   | 6      | 327.1    | 327.3    | [M+H] <sup>+</sup>     |
| C   | 1      | 247.1    | 247.1    | [M+H] <sup>+</sup>     |
| C   | 2      | 243.1    | 243.1    | [M+H] <sup>+</sup>     |
| C   | 3      | 150.1    | 150.0    | [M+H] <sup>+</sup>     |
| C   | 4      | 217.1    | 217.2    | [M+H] <sup>+</sup>     |
| C   | 5      | 295.1    | 295.2    | [M+H] <sup>+</sup>     |
| C   | 6      | 391.1    | 391.2    | [M+Na] <sup>+</sup>    |
| D   | 1      | 224.1    | 224.1    | [M-tBu+H] <sup>+</sup> |
| D   | 2      | 210.1    | 210.1    | [M-tBu+H] <sup>+</sup> |
| D   | 3      | -        | N/A      | -                      |
| D   | 4      | 190.1    | 190.1    | [M+H] <sup>+</sup>     |
| D   | 5      | 244.1    | 244.1    | [M+H] <sup>+</sup>     |
| D   | 6      | 312.1    | 312.1    | [M+H] <sup>+</sup>     |
